# Supplementary material for: Functionalized cationic [4]helicenes with unique tuning of absorption, fluorescence and chiroptical properties up to the far-red range
Source: PubMed Central journal article supplement (PMC5772034; doi:10.1039/c6sc00614k), 2016-04-08
Supplement: SC-007-C6SC00614K-s001.pdf [file SC-007-C6SC00614K-s001.pdf]

Supporting Information

# Functionalized Cationic [4]Helicenes with Unique Tuning of Absorption, Fluorescence and Chiroptical Properties up to the Far-Red Range

Irene Hernández Delgado, Simon Pascal, Antoine Wallabregue, Romain Duwald, Céline Besnard, Laure Guénée, Christoph Nançoz, Eric Vauthey, Roberto C. Tovar, Jamie L. Lunkley, Gilles Muller, and Jérôme Lacour

|                                                                                     |           |
|-------------------------------------------------------------------------------------|-----------|
| <b>1. GENERAL REMARKS AND ANALYSIS CONDITIONS.....</b>                              | <b>2</b>  |
| <b>2. SYNTHETIC PROTOCOLS AND CHARACTERIZATIONS .....</b>                           | <b>4</b>  |
| <b>3. <sup>1</sup>H, <sup>13</sup>C, <sup>19</sup>F NMR AND HRMS ANALYSIS .....</b> | <b>21</b> |
| <b>4. X-RAY DIFFRACTION.....</b>                                                    | <b>73</b> |
| <b>5. <sup>1</sup>H-NOESY EXPERIMENT .....</b>                                      | <b>85</b> |
| <b>6. ADDITIONAL CYCLIC VOLTAMMETRY DATA.....</b>                                   | <b>86</b> |
| <b>7. ADDITIONAL OPTICAL DATA .....</b>                                             | <b>88</b> |
| 1. SOLVATOCHROMISM .....                                                            | 88        |
| 2. FLUORESCENCE .....                                                               | 90        |
| 3. ECD AND OR DATA .....                                                            | 91        |
| <b>8. REFERENCES.....</b>                                                           | <b>93</b> |

## 1. General remarks and analysis conditions

**Reagents.** Compound **1** was prepared according to reported procedures from tris(2,6-dimethoxyphenyl)methylmethyl tetrafluoroborate.<sup>1,2</sup> Column chromatography were performed using Siliacel P60 silicagel (40-63  $\mu\text{m}$ , 60  $\text{\AA}$ ) and Acros Brockmann I basic alumina (40-200  $\mu\text{m}$ , 60  $\text{\AA}$ ). Optical properties were recorded in analytical grade solvents.

**Analytical methods and apparatus.** NMR spectra were recorded on Bruker Advance II+ AMX-500 and AMX-400 spectrometers at room temperature (otherwise noted). NMR chemical shifts are given in ppm ( $\delta$ ) relative to  $\text{Me}_4\text{Si}$  with solvent resonances used as internal standards ( $\text{CD}_2\text{Cl}_2$ : 5.32 ppm for  $^1\text{H}$  and 53.8 for  $^{13}\text{C}$ ;  $\text{CD}_3\text{OD}$ : 3.31 ppm for  $^1\text{H}$  and 49.0 for  $^{13}\text{C}$ ;  $\text{DMSO-d}_6$ : 2.50 ppm for  $^1\text{H}$  and 39.5 for  $^{13}\text{C}$ ). IR spectra were recorded on a Perkin-Elmer 1650 FT-IR spectrometer using a diamond ATR Golden Gate sampling. Melting points (M.P.) were measured in open capillary tubes with a Buchi B-550 melting points apparatus and are uncorrected. UV-Vis-NIR absorption spectra were recorded on a JASCO V-650 spectrophotometer at 20°C. Electrospray mass spectra were obtained on a Finnigan SSQ 7000 spectrometer QSTAR pulsar / (AB / MDS Sciex), ESI (TIS)/nanoESI/APCI-QqTof by the Department of Mass Spectroscopy of the University of Geneva. Optical rotation were measured on a Perkin Elmer 241 polarimeter at 20°C using a Hg lamp (365 nm). Electronic circular dichroism spectra were recorded on a JASCO J-815 spectrophotometer at 20 °C.

**Crystallography.** All data were collected on an Agilent supernova dual source diffractometer equipped with an Atlas detector, using  $\text{Cu K}\alpha$  radiation. Data reduction was carried out in the crysalis Pro Software.<sup>3</sup> Structure solution was made using direct methods (Shelxs<sup>4</sup> or sir2004<sup>5</sup>) or charge-flipping (Superflip<sup>6</sup>). Refinements were carried out in ShexlL<sup>4</sup> within the Olex2<sup>7</sup> software.

**Electrochemistry.** Cyclic voltammetry (CV) data were recorded using a CH instruments potentiostat. All the experiments were conducted under an argon atmosphere in a standard one-compartment, three-electrode electrochemical cell placed in a faraday cage. Tetra-n-butylammonium hexafluorophosphate ( $[\text{TBA}][\text{PF}_6]$ ) in anhydrous acetonitrile was used as supporting electrolytes ( $10^{-1}$  M). All the electrodes were purchased from BAS Inc. Platinum ( $\varnothing = 3$  mm) working electrodes was polished with 0.05  $\mu\text{m}$  alumina paste before each recording. An  $\text{Ag}|\text{AgNO}_3$  ( $10^{-2}$  M +  $\text{TBA}\cdot\text{PF}_6$   $10^{-1}$  M) electrode was used as a pseudo-reference. Before experiment, the solution was degassed using argon for 5 minutes. Ferrocene was used as redox potential of reference.

**Fluorescence.** Steady-state fluorescence spectra were measured using a Varian Cary 50 Eclipse spectrofluorimeter. All fluorescence spectra were corrected for the wavelength-dependent sensitivity of the detection. Fluorescence quantum yields  $\Phi$  were measured in diluted solutions (at least 5 different concentrations for each sample) with an optical density lower than 0.1 using the following equation:

$$\frac{\Phi_x}{\Phi_r} = \left( \frac{A_r(\lambda)}{A_x(\lambda)} \right) \left( \frac{n_x^2}{n_r^2} \right) \left( \frac{D_x}{D_r} \right)$$

where A is the absorbance at the excitation wavelength ( $\lambda$ ), n the refractive index and D the integrated intensity. “r” and “x” stand for reference and sample. The fluorescence quantum yields were measured relative to cresyl violet in methanol ( $\Phi = 0.54$ ). Excitation of reference and sample compounds was performed at the same wavelength.

**Fluorescence lifetime.** Fluorescence dynamics on the nanosecond timescale were measured by a time-correlated single photon counting (TCSPC) setup described in detail previously.<sup>8,9</sup> Excitation was performed at 470 nm using ~60 ps pulse at 10 MHz produced by a laser diode (Picoquant, LDH-P-C-470). The full width at half-maximum (fwhm) of the instrument response function (IRF) was around 200 ps. The fluorescence time profiles were analysed with the convolution of the experimental IRF and an exponential function.

**Circularly polarized luminescence.** The circularly polarized luminescence (CPL) and total luminescence spectra were recorded on an instrument described previously,<sup>10</sup> operating in a differential photon-counting mode. The light source for excitation was a continuous wave 1000 W xenon arc lamp from a Spex Fluorolog-2 spectrofluorimeter, equipped with excitation and emission monochromators with dispersion of 4 nm/mm (SPEX, 1681B). To prevent artifacts associated with the presence of linear polarization in the emission,<sup>11</sup> a high quality linear polarizer was placed in the sample compartment, and aligned so that the excitation beam was linearly polarized in the direction of emission detection (z-axis). The key feature of this geometry is that it ensures that the molecules that have been excited and that are subsequently emitting are isotropically distributed in the plane (x,y) perpendicular to the direction of emission detection. The optical system detection consisted of a focusing lens, long pass filter, and 0.22 m monochromator. The emitted light was detected by a cooled EMI-9558B photomultiplier tube operating in photo-counting mode. All measurements were performed with quartz cuvettes with a path length of 1.0 cm.

## 2. Synthetic protocols and characterizations

### 1,13-Dimethoxy-6-nitro-5,9-dipropyl-5,9-dihydro-13b*H*-quinolino[2,3,4-*k*]acridin-13b-ylium tetrafluoroborate (5)

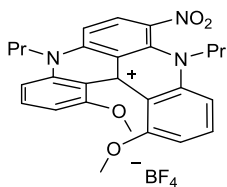

To a solution of **1** (1 g, 2 mmol) in CH<sub>2</sub>Cl<sub>2</sub> (40 mL, 0.05 M) were added 40 mL of aqueous HNO<sub>3</sub> (60%, 0.05 M). After 15 min of stirring at 25 °C (monitored by TLC), the reaction mixture was quenched by addition of aqueous NaOH (1 M) and then, it was extracted with CH<sub>2</sub>Cl<sub>2</sub> (3 x 20 mL) and washed with HBF<sub>4</sub> 1 M in H<sub>2</sub>O. The organic layer was dried over Na<sub>2</sub>SO<sub>4</sub>, filtered and evaporated under *vacuum*. The desired product was obtained as a red solid (1.08 g, 99%) after filtration.

**R<sub>f</sub>** = 0.6 (SiO<sub>2</sub>, CH<sub>2</sub>Cl<sub>2</sub>/MeOH, 98:2). **M. P.:** 273-275 °C (decomposition). **<sup>1</sup>H NMR (400 MHz, CD<sub>2</sub>Cl<sub>2</sub>):** δ = 8.81 (d, *J* = 9.6 Hz, 1H, CH), 8.13 (t, *J* = 8.4 Hz, 1H, CH), 7.99 (t, *J* = 8.4 Hz, 1H, CH), 7.65 – 7.57 (m, 2H, CH), 7.49 (d, *J* = 8.6 Hz, 1H, CH), 7.10 (d, *J* = 8.1 Hz, 1H, CH), 7.01 (d, *J* = 8.2 Hz, 1H, CH), 4.97 – 4.75 (m, 2H, CH), 4.71 – 4.56 (m, 1H, CH), 3.84 (s, 3H, OCH<sub>3</sub>), 3.79 (s, 3H, OCH<sub>3</sub>), 3.59 – 3.44 (m, 1H, CH), 2.31 – 2.14 (m, 2H, CH<sub>2</sub>), 1.84 – 1.69 (m, 2H, CH<sub>2</sub>), 1.29 (t, *J* = 7.4 Hz, 3H, CH<sub>3</sub>), 0.45 (t, *J* = 7.3 Hz, 3H, CH<sub>3</sub>). **<sup>13</sup>C{<sup>1</sup>H} NMR (101 MHz, CD<sub>2</sub>Cl<sub>2</sub>):** δ 160.2 (C), 159.6 (C), 141.8 (C), 141.7 (C), 141.4 (C), 141.3 (C), 139.6 (CH), 138.01 (CH), 136.5 (C), 134.7 (CH), 132.1 (C), 120.5 (C), 116.9 (C), 114.5 (C), 110.4 (CH), 108.3 (CH), 106.7 (CH), 105.8 (CH), 105.4 (CH), 58.8 (CH<sub>2</sub>), 56.7 (OCH<sub>3</sub>), 56.5 (OCH<sub>3</sub>), 22.6 (CH<sub>2</sub>), 21.3 (CH<sub>2</sub>), 11.4 (CH<sub>3</sub>), 10.8 (CH<sub>3</sub>). **<sup>19</sup>F NMR (282 MHz, CD<sub>2</sub>Cl<sub>2</sub>):** δ = -152.5. **UV-Vis:** λ<sub>max</sub> (CH<sub>3</sub>CN) = 575 nm (ε = 12000 L.mol<sup>-1</sup>.cm<sup>-1</sup>). **IR (CH<sub>2</sub>Cl<sub>2</sub>, cm<sup>-1</sup>):** ν = 3107, 2969, 2880, 1585, 1500, 1468, 1389, 1285, 1168, 1040, 817, 731, 699, 632. **HRMS (ESI+)** calculated for [M<sup>+</sup>]: 458.2074 (C<sub>27</sub>H<sub>28</sub>N<sub>3</sub>O<sub>4</sub><sup>+</sup>), Found 458.2097.

### 6-Formyl-1,13-dimethoxy-5,9-dipropyl-5,9-dihydro-13b*H*-quinolino[2,3,4-*k*]acridin-13b-ylium tetrafluoroborate (6)

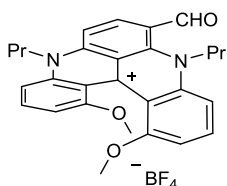

To a solution of **1** (1 g, 2.00 mmol) in DMF (1.85 mL, 24.00 mmol) at 90 °C was added POCl<sub>3</sub> (4.5 mL, 45.00 mmol). After being stirred for 2 h at this temperature (monitored by ESI-MS), H<sub>2</sub>O (10 mL) was added to the reaction mixture at 25 °C and stirred for 30 min. Then, the mixture was washed with aqueous 5% LiCl solution and extracted with CH<sub>2</sub>Cl<sub>2</sub> (3 x 20 mL). The organic layer was washed with HBF<sub>4</sub> 1 M in H<sub>2</sub>O, dried

over Na<sub>2</sub>SO<sub>4</sub>, filtered and evaporated under *vacuum*. The crude material was purified by flash chromatography on silica gel (CH<sub>2</sub>Cl<sub>2</sub>/MeOH, 98:2). The desired product is obtained as a purple solid (908 mg, 86%).

**R<sub>f</sub>** = 0.5 (SiO<sub>2</sub>, CH<sub>2</sub>Cl<sub>2</sub>/MeOH, 98:2). **M. P.:** 264-266 °C (decomposition). **<sup>1</sup>H NMR (400 MHz, CD<sub>2</sub>Cl<sub>2</sub>):** δ = 10.17 (s, 1H, CHO), 8.60 (d, *J* = 9.0 Hz, 1H, CH), 8.07 (t, *J* = 8.2 Hz, 1H, CH), 7.96 (t, *J* = 8.4 Hz, 1H, CH), 7.68 (d, *J* = 9.0 Hz, 1H, CH), 7.56 (d, *J* = 8.8 Hz, 2H, CH), 7.05 (d, *J* = 8.1 Hz, 1H, CH), 6.97 (d, *J* = 8.0 Hz, 1H, CH), 5.20 – 5.13 (m, 1H, CH), 4.82 – 4.74 (m, 1H, CH), 4.64 – 4.55 (m, 1H, CH), 4.09 – 4.01 (m, 1H, CH), 3.82 (s, 3H, OCH<sub>3</sub>), 3.78 (s, 3H, OCH<sub>3</sub>), 2.30 – 2.17 (m, 2H, CH<sub>2</sub>), 1.81 – 1.67 (m, 2H, CH<sub>2</sub>), 1.30 (t, *J* = 7.4 Hz, 3H, CH<sub>3</sub>), 0.41 (t, *J* = 7.3 Hz, 3H, CH<sub>3</sub>). **<sup>13</sup>C{<sup>1</sup>H} NMR (101 MHz, CD<sub>2</sub>Cl<sub>2</sub>):** δ = 186.9 (C), 160.2



(C), 159.6 (C), 142.4 (CH), 142.1 (C), 141.9 (C), 141.7 (C), 141.5 (C), 141.0 (C), 138.9 (CH), 137.4 (CH), 120.2 (C), 117.7 (C), 116.8 (C), 114.2 (C), 110.7 (CH), 108.1 (CH), 106.9 (CH), 105.2 (CH), 104.8 (CH), 60.8 (CH<sub>2</sub>), 56.6 (OCH<sub>3</sub>), 56.4 (OCH<sub>3</sub>), 23.0 (CH<sub>2</sub>), 21.1 (CH<sub>2</sub>), 11.4 (CH<sub>3</sub>), 10.9 (CH<sub>3</sub>). **<sup>19</sup>F NMR (282 MHz, CD<sub>2</sub>Cl<sub>2</sub>):**  $\delta$  = -152.5. **UV-Vis:**  $\lambda_{\text{max}}$  (CH<sub>3</sub>CN) = 582 nm ( $\epsilon$  = 10750 L.mol<sup>-1</sup>.cm<sup>-1</sup>). **IR (CH<sub>2</sub>Cl<sub>2</sub>, cm<sup>-1</sup>):**  $\nu$  = 2961, 2961, 2752, 1686, 1583, 1506, 1470, 1343, 1266, 1171, 1050, 818, 784, 732, 653. **HRMS (ESI+)** calculated for [M<sup>+</sup>]: 441.2173 (C<sub>28</sub>H<sub>29</sub>N<sub>2</sub>O<sub>3</sub><sup>+</sup>), Found 441.2192.

**6-amino-1,13-dimethoxy-5,9-dipropyl-5,9-dihydro-13bH-quinolino[2,3,4-kl]acridin-13b-ylum tetrafluoroborate (7)**

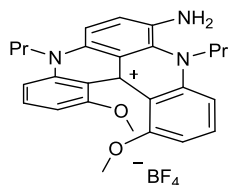

To solution of **5** (1.084 g, 2.00 mmol) in CH<sub>2</sub>Cl<sub>2</sub>/methanol (60:20 mL) under N<sub>2</sub> atmosphere was added Pd/C (108 mg, 10% wt). Then H<sub>2</sub> was bubbled in the reaction mixture for 5 min and stirred further for 30 min at 25 °C (monitored by ESI-MS). Then, the reaction mixture was purged with N<sub>2</sub> and filtered over celite®, with CH<sub>2</sub>Cl<sub>2</sub>. The solvent was evaporated under *vacuum*. The desired product was obtained as a light green solid (1.14 g, 99%) after evaporation of solvent.

**R<sub>f</sub>** = 0.4 (SiO<sub>2</sub>, CH<sub>2</sub>Cl<sub>2</sub>/MeOH, 98:2). **M. P.:** 231-233 °C (decomposition). **<sup>1</sup>H NMR (400 MHz, CD<sub>2</sub>Cl<sub>2</sub>):**  $\delta$  = 7.85 (t,  $J$  = 9.0, 7.8 Hz, 1H, CH), 7.77 (d,  $J$  = 9.1 Hz, 1H, CH), 7.70 (t,  $J$  = 8.4 Hz, 1H, CH), 7.52 (d,  $J$  = 9.1 Hz, 1H, CH), 7.34 (d,  $J$  = 9.0 Hz, 1H, CH), 7.29 (d,  $J$  = 8.8 Hz, 1H, CH), 6.81 (d,  $J$  = 8.0 Hz, 1H, CH), 6.69 (d,  $J$  = 8.1 Hz, 1H, CH), 4.79 – 4.71 (m, 1H, CH), 4.67 – 4.58 (m, 1H, CH), 4.49 – 4.39 (m, 2H, CH), 4.28 (s, 2H, NH<sub>2</sub>), 3.76 (s, 3H, OCH<sub>3</sub>), 3.69 (s, 3H, OCH<sub>3</sub>), 2.26 – 2.05 (m, 2H, CH<sub>2</sub>), 1.63 – 1.45 (m, 2H, CH<sub>2</sub>), 1.24 (t,  $J$  = 7.4 Hz, 3H, CH<sub>3</sub>), 0.53 (t,  $J$  = 7.4 Hz, 3H, CH<sub>3</sub>). **<sup>13</sup>C{<sup>1</sup>H} NMR (101 MHz, CD<sub>2</sub>Cl<sub>2</sub>):**  $\delta$  = 160.1 (C), 159.6 (C), 148.0 (C), 143.6 (C), 142.4 (C), 137.2 (CH), 136.4 (CH), 132.2 (C), 131.6 (C), 128.0 (C), 126.9 (CH), 123.8 (C), 117.7 (C), 114.6 (C), 110.5 (CH), 107.9 (CH), 107.8 (CH), 103.1 (CH), 103.1 (CH), 56.3 (OCH<sub>3</sub>), 56.0 (OCH<sub>3</sub>), 51.6 (CH<sub>2</sub>), 22.7 (CH<sub>2</sub>), 21.1 (CH<sub>2</sub>), 11.5 (CH<sub>3</sub>), 11.3 (CH<sub>3</sub>). **<sup>19</sup>F NMR (282 MHz, CD<sub>2</sub>Cl<sub>2</sub>):**  $\delta$  = -152.4. **UV-Vis:**  $\lambda_{\text{max}}$  (CH<sub>3</sub>CN) = 698 nm ( $\epsilon$  = 6560 L.mol<sup>-1</sup>.cm<sup>-1</sup>). **IR (CH<sub>2</sub>Cl<sub>2</sub>, cm<sup>-1</sup>):**  $\nu$  = 3663, 2964, 1605, 1578, 1559, 1502, 1470, 1369, 1263, 1166, 1056, 812, 775, 730, 656. **HRMS (ESI+)** calculated for [M<sup>+</sup>]: 428.2333 (C<sub>27</sub>H<sub>30</sub>N<sub>3</sub>O<sub>4</sub><sup>+</sup>), Found 428.2325.

**6-(dimethylamino)-1,13-dimethoxy-5,9-dipropyl-5,9-dihydro-13bH-quinolino[2,3,4-kl]acridin-13b-ylum tetrafluoroborate (8)**

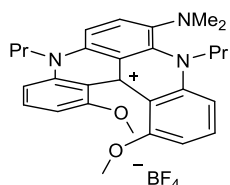

To solution of **7** (500 mg, 0.97 mmol) in THF (12.6 mL) was added aqueous formaldehyde (40%, 350 mg, 11.64 mmol) and the reaction mixture was stirred for 15 min. Then NaBH<sub>3</sub>CN (427 mg, 6.80 mmol) was added, and the reaction mixture was stirred for 15 min, followed by addition of AcOH (1.26 mL, 22.0 mmol). The resulting mixture was stirred for 1 h at 25 °C (monitored by ESI-MS). The reaction was quenched by addition of NaOH 1 N to adjust the solution to pH  $\approx$  7. The reaction mixture was extracted with CH<sub>2</sub>Cl<sub>2</sub> (3 x 20 mL) and washed with HBF<sub>4</sub> 1 M in H<sub>2</sub>O. The organic layer was dried over Na<sub>2</sub>SO<sub>4</sub>, filtered and evaporated under *vacuum*. The crude material was dissolved in a minimum amount of CH<sub>2</sub>Cl<sub>2</sub> and then

the addition of Et<sub>2</sub>O led to the precipitation of the product, which was separated from the mother liquor by centrifugation. The desired product was further purified by flash chromatography (CH<sub>2</sub>Cl<sub>2</sub>/MeOH, 98:2) as a light green solid (495 mg, 94%).

**R<sub>f</sub>** = 0.5 (SiO<sub>2</sub>, CH<sub>2</sub>Cl<sub>2</sub>/MeOH, 98:2). **M. P.:** 122-124 °C (decomposition). **<sup>1</sup>H NMR (400 MHz, CD<sub>2</sub>Cl<sub>2</sub>):** δ = 7.98 (d, *J* = 9.2 Hz, 1H, CH), 7.91 (t, *J* = 8.5 Hz, 1H, CH), 7.78 (t, *J* = 8.4 Hz, 1H, CH), 7.60 (d, *J* = 9.2 Hz, 1H, CH), 7.39 (d, *J* = 9.2 Hz, 2H, CH), 6.86 (d, *J* = 8.0 Hz, 1H, CH), 6.77 (d, *J* = 8.1 Hz, 1H, CH), 5.19 – 5.11 (m, 1H, CH), 4.71 – 4.62 (m, 1H, CH), 4.51 – 4.42 (m, 2H, CH), 3.78 (s, 3H, OCH<sub>3</sub>), 3.72 (s, 3H, OCH<sub>3</sub>), 3.2 – 2.5 (bs, 6H, NCH<sub>3</sub>), 2.27 – 2.06 (m, 3H, CH<sub>2</sub>), 1.48 – 1.38 (m, 2H, CH<sub>2</sub>), 1.25 (t, *J* = 7.4 Hz, 3H, CH<sub>3</sub>), 0.51 (t, *J* = 7.3 Hz, 3H, CH<sub>3</sub>). **<sup>13</sup>C{<sup>1</sup>H} NMR (101 MHz, CD<sub>2</sub>Cl<sub>2</sub>):** δ = 160.1 (C), 159.7 (C), 146.7 (C), 143.2 (C), 142.4 (C), 137.8 (C), 137.7 (CH), 136.8 (CH), 133.6 (C), 131.0 (C), 128.3 (CH), 123.5 (C), 116.9 (C), 114.2 (C), 109.5 (CH), 107.8 (CH), 107.2 (CH), 103.3 (CH), 103.2 (CH), 56.3 (OCH<sub>3</sub>), 56.1 (OCH<sub>3</sub>), 50.4 (CH<sub>2</sub>), 42.2 (NCH<sub>3</sub>), 22.6 (CH<sub>2</sub>), 20.9 (CH<sub>2</sub>), 11.4 (CH<sub>3</sub>), 11.4 (CH<sub>3</sub>). **<sup>19</sup>F NMR (282 MHz, CD<sub>2</sub>Cl<sub>2</sub>):** δ = -152.8. **UV-Vis:** λ<sub>max</sub> (CH<sub>3</sub>CN) = 675 nm (ε = 5580 L.mol<sup>-1</sup>.cm<sup>-1</sup>). **IR (CH<sub>2</sub>Cl<sub>2</sub>, cm<sup>-1</sup>):** ν = 2963, 2847, 1601, 1577, 1558, 1450, 1470, 1321, 1263, 1170, 1051, 921, 814, 779, 732, 620. **HRMS (ESI+)** calculated for [M<sup>+</sup>]: 456.2645 (C<sub>29</sub>H<sub>34</sub>N<sub>3</sub>O<sub>2</sub><sup>+</sup>), Found 456.2645.

#### 6-azido-1,13-dimethoxy-5,9-dipropyl-5,9-dihydro-13bH-quinolino[2,3,4-kl]acridin-13b-ylium tetrafluoroborate (9)

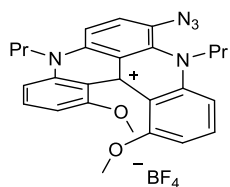

To solution of **7** (200 mg, 0.39 mmol) in MeCN (0.39 mL) at 0 °C and in the absence of light, *t*-BuONO (70 μL, 0.60 mmol) and TMSN<sub>3</sub> (102 μL, 0.78 mmol) were added dropwise. The reaction mixture was stirred for 3 h at 25 °C (monitored by ESI-MS). Then, the addition of Et<sub>2</sub>O led to the precipitation of the product, which was separated from the mother liquor by centrifugation. The desired product was further purified by

flash chromatography (CH<sub>2</sub>Cl<sub>2</sub>/MeOH, 98:2) as a green solid (208 mg, 99%).

**R<sub>f</sub>** = 0.4 (SiO<sub>2</sub>, CH<sub>2</sub>Cl<sub>2</sub>/MeOH, 98:2). **M. P.:** 190-192 °C (decomposition). **<sup>1</sup>H NMR (400 MHz, CD<sub>2</sub>Cl<sub>2</sub>):** δ = 8.02 (d, *J* = 9.1 Hz, 1H, CH), 7.96 (t, *J* = 8.9 Hz, 1H, CH), 7.83 (t, *J* = 8.8 Hz, 1H, CH), 7.66 (d, *J* = 9.2 Hz, 1H), 7.42 (d, *J* = 9.2 Hz, 1H, CH), 7.38 (d, *J* = 9.2 Hz, 1H, CH), 6.90 (d, *J* = 8.1 Hz, 1H), 6.81 (d, *J* = 8.2 Hz, 1H), 4.95 – 4.87 (m, 1H, CH), 4.74 – 4.59 (m, 2H, CH), 4.53 – 4.44 (m, 1H, CH), 3.77 (s, 3H, OCH<sub>3</sub>), 3.72 (s, 3H, OCH<sub>3</sub>), 2.26 – 2.11 (m, 2H, CH<sub>2</sub>), 1.86 – 1.76 (m, 2H, CH<sub>2</sub>), 1.26 (t, *J* = 7.4 Hz, 4H, CH<sub>3</sub>), 0.70 (t, *J* = 7.4 Hz, 3H, CH<sub>3</sub>). **<sup>13</sup>C{<sup>1</sup>H} NMR (101 MHz, CD<sub>2</sub>Cl<sub>2</sub>):** δ = 160.1 (C), 159.6 (C), 145.6 (C), 143.4 (C), 142.4 (C), 138.4 (CH), 137.5 (CH), 135.7 (C), 131.0 (C), 127.8 (CH), 122.3 (C), 121.1 (C), 116.4 (C), 114.4 (C), 109.6 (CH), 107.9 (CH), 107.6 (CH), 104.0 (CH), 103.8 (CH), 56.4 (OCH<sub>3</sub>), 56.2 (OCH<sub>3</sub>), 55.7 (CH<sub>2</sub>), 23.2 (CH<sub>2</sub>), 20.9 (CH<sub>2</sub>), 11.4 (CH<sub>3</sub>), 11.3 (CH<sub>3</sub>). **<sup>19</sup>F NMR (282 MHz, CD<sub>2</sub>Cl<sub>2</sub>):** δ = -152.4. **UV-Vis:** λ<sub>max</sub> (CH<sub>3</sub>CN) = 644 nm (ε = 8790 L.mol<sup>-1</sup>.cm<sup>-1</sup>). **IR (CH<sub>2</sub>Cl<sub>2</sub>, cm<sup>-1</sup>):** ν = 3556, 3108, 2966, 2880, 2112, 1602, 1578, 1500, 1470, 1323, 1263, 1170, 1127, 1044, 813, 776, 732, 711, 639. **HRMS (ESI+)** calculated for [M<sup>+</sup>][N<sub>2</sub>]: 426.2176 (C<sub>27</sub>H<sub>28</sub>N<sub>3</sub>O<sub>2</sub><sup>+</sup>), Found 426.2188.

### General procedure for the synthesis of triazolo quinacridinium tetrafluoroborate salts (10a-c).

To a solution of **9** (25 mg, 0.05 mmol) and the corresponding alkyne (0.1 – 0.25 mmol) in methanol (40  $\mu$ L), was added a solution of  $\text{CuSO}_4 \cdot 5\text{H}_2\text{O}$  (0.9 mg, 8 mol%) dropwise, followed by ascorbic acid (1.7 mg, 21 mol%) and  $\text{NaHCO}_3$  (0.8 mg, 21 mol%) in water (40  $\mu$ L). The reaction mixture was stirred for 4 - 24 h (monitored by ESI-MS). The crude product was precipitated in  $\text{Et}_2\text{O}$ . The crude precipitate was filtered and purified by dissolving it in a minimum amount of  $\text{CH}_2\text{Cl}_2$  and then the addition of  $\text{Et}_2\text{O}$  led to the precipitation of the product, which was separated from the mother liquor by centrifugation. Desired products were obtained as light green solids.

### 1,13-dimethoxy-6-(4-phenyl-1H-1,2,3-triazol-1-yl)-5,9-dipropyl-5,9-dihydro-13bH-quinolino[2,3,4-kl]acridin-13b-ylum tetrafluoroborate (10a)

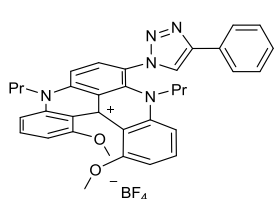

Prepared according to general procedure using ethynylbenzene (5  $\mu$ L, 0.1 mmol).

The reaction mixture was stirred for 4 h. Purification by selective precipitation with  $\text{CH}_2\text{Cl}_2$  and  $\text{Et}_2\text{O}$  provided the product as a light green solid (29 mg, 99%).

**R<sub>f</sub>** = 0.3 ( $\text{SiO}_2$ ,  $\text{CH}_2\text{Cl}_2/\text{MeOH}$ , 98:2). **M. P.:** 267-269 °C (decomposition). **<sup>1</sup>H NMR (400 MHz,  $\text{CD}_2\text{Cl}_2$ ):**  $\delta$  = 8.42 (s, 1H, CH), 8.24 (d,  $J$  = 9.1 Hz, 1H), 8.05 (t,  $J$  = 8.4 Hz, 1H, CH), 8.01 (d,  $J$  = 8.0 Hz, 2H, CH), 7.86 (t,  $J$  = 8.4 Hz, 1H, CH), 7.72 (d,  $J$  = 9.1 Hz, 1H, CH), 7.56 – 7.47 (m, 3H, CH), 7.43 – 7.38 (m, 1H, CH), 7.29 (d,  $J$  = 8.6 Hz, 1H, CH), 7.00 (d,  $J$  = 8.1 Hz, 1H, CH), 6.90 (d,  $J$  = 8.1 Hz, 1H, CH), 4.82 – 4.72 (m, 1H, CH), 4.65 – 4.54 (m, 1H, CH), 4.28 – 4.19 (m, 1H, CH), 3.81 (s, 3H,  $\text{OCH}_3$ ), 3.77 (s, 3H,  $\text{OCH}_3$ ), 3.15 – 3.06 (m, 1H, CH), 2.34 – 2.12 (m, 2H,  $\text{CH}_2$ ), 1.68 – 1.44 (m, 2H,  $\text{CH}_2$ ), 1.29 (t,  $J$  = 7.4 Hz, 3H,  $\text{CH}_3$ ), 0.38 (t,  $J$  = 7.3 Hz, 3H,  $\text{CH}_3$ ). **<sup>13</sup>C{<sup>1</sup>H} NMR (101 MHz,  $\text{CD}_2\text{Cl}_2$ ):**  $\delta$  = 160.2 (C), 159.6 (C), 149.4 (C), 144.0 (C), 143.2 (C), 142.4 (C), 139.0 (CH), 134.0 (C), 137.6 (CH), 135.9 (C), 135.8 (CH), 130.4 (C), 129.6 (CH), 129.3 (CH), 126.5 (CH), 122.1 (CH), 121.8 (C), 119.1 (C), 116.9 (C), 114.6 (C), 109.9 (CH), 108.1 (CH), 107.5 (CH), 104.7 (CH), 104.4 (CH), 56.5 ( $\text{OCH}_3$ ), 56.3 ( $\text{OCH}_3$ ), 53.8 ( $\text{CH}_2$ ), 22.5 ( $\text{CH}_2$ ), 21.0 ( $\text{CH}_2$ ), 11.4 ( $\text{CH}_3$ ), 10.9 ( $\text{CH}_3$ ). **<sup>19</sup>F NMR (282 MHz,  $\text{CD}_2\text{Cl}_2$ ):**  $\delta$  = -152.2. **UV-Vis:**  $\lambda_{\text{max}}$  ( $\text{CH}_3\text{CN}$ ) = 606 nm ( $\epsilon$  = 11670  $\text{L}\cdot\text{mol}^{-1}\cdot\text{cm}^{-1}$ ). **IR ( $\text{CH}_2\text{Cl}_2$ ,  $\text{cm}^{-1}$ ):**  $\nu$  = 3132, 2967, 1602, 1585, 1509, 1470, 1338, 1264, 1169, 1129, 1046, 896, 864, 816, 771, 732, 698, 640. **HRMS (ESI+)** calculated for  $[\text{M}^+]$ : 556.2707 ( $\text{C}_{35}\text{H}_{34}\text{N}_5\text{O}_2^+$ ), Found 556.2681.

### 1,13-dimethoxy-5,9-dipropyl-6-(4-(4-(trifluoromethyl)phenyl)-1H-1,2,3-triazol-1-yl)-5,9-dihydro-13bH-quinolino[2,3,4-kl]acridin-13b-ylum tetrafluoroborate (10b)

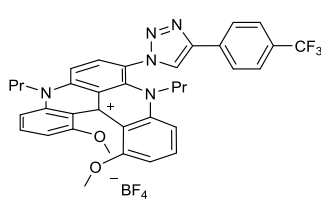

Prepared according to general procedure using 1-ethynyl-4-(trifluoromethyl)benzene (38  $\mu$ L, 0.25 mmol). The reaction mixture was stirred for 24 h. Purification by selective precipitation with  $\text{CH}_2\text{Cl}_2$  and  $\text{Et}_2\text{O}$  provided the product as a light green solid (35 mg, 99%).

**R<sub>f</sub>** = 0.3 ( $\text{SiO}_2$ ,  $\text{CH}_2\text{Cl}_2/\text{MeOH}$ , 98:2). **M. P.:** 257-259 °C (decomposition). **<sup>1</sup>H NMR (400 MHz,  $\text{CD}_2\text{Cl}_2$ ):**  $\delta$  = 8.66 (s, 1H, CH), 8.24 (d,  $J$  = 9.2 Hz, 1H, CH), 8.16 (d,  $J$  = 8.0 Hz, 2H, CH),

8.05 (t,  $J = 8.8$  Hz, 1H, CH), 7.87 (t,  $J = 8.4$  Hz, 1H, CH), 7.78 – 7.69 (m, 3H, CH), 7.53 (d,  $J = 8.9$  Hz, 1H, CH), 7.30 (d,  $J = 8.6$  Hz, 1H, CH), 6.99 (d,  $J = 8.1$  Hz, 1H, CH), 6.91 (d,  $J = 8.1$  Hz, 1H, CH), 4.81 – 4.71 (m, 1H, CH), 4.63 – 4.53 (m, 1H, CH), 4.27 – 4.19 (m, 1H, CH), 3.80 (s, 3H, OCH<sub>3</sub>), 3.76 (s, 3H, OCH<sub>3</sub>), 3.14 – 3.05 (m, 1H, CH), 2.33 – 2.15 (m, 2H, CH<sub>2</sub>), 1.64 – 1.44 (m, 2H, CH<sub>2</sub>), 1.29 (t,  $J = 7.4$  Hz, 3H, CH<sub>3</sub>), 0.38 (t,  $J = 7.3$  Hz, 3H, CH<sub>3</sub>). **<sup>13</sup>C{<sup>1</sup>H} NMR (101 MHz, CD<sub>2</sub>Cl<sub>2</sub>):**  $\delta = 160.2$  (C), 159.6 (C), 148.0 (C), 144.0 (C), 143.2 (C), 142.4 (C), 139.0 (C), 138.9 (CH), 137.6 (CH), 135.9 (C), 135.8 (CH), 134.1 (C), 134.1 (C), 130.6 (CF<sub>3</sub>), 126.8 (CH), 126.5 (CH), 126.5 (CH), 123.4 (CH), 121.8 (C), 118.9 (C), 116.8 (C), 114.6 (C), 109.9 (CH), 108.1 (CH), 107.4 (CH), 104.7 (CH), 104.5 (CH), 56.5 (OCH<sub>3</sub>), 56.3 (OCH<sub>3</sub>), 53.9 (CH<sub>2</sub>), 22.4 (CH<sub>2</sub>), 21.0 (CH<sub>2</sub>), 11.4 (CH<sub>3</sub>), 10.8 (CH<sub>3</sub>). **<sup>19</sup>F NMR (282 MHz, CD<sub>2</sub>Cl<sub>2</sub>):**  $\delta = -62.2, -152.0$ . **UV-Vis:**  $\lambda_{\max}$  (CH<sub>3</sub>CN) = 605 nm ( $\epsilon = 12820$  L.mol<sup>-1</sup>.cm<sup>-1</sup>). **IR (CH<sub>2</sub>Cl<sub>2</sub>, cm<sup>-1</sup>):**  $\nu = 3130, 2966, 1603, 1586, 1511, 1470, 1324, 1263, 1168, 1120, 1058, 815, 776, 736, 642$ . **HRMS (ESI+)** calculated for [M<sup>+</sup>]: 624.2581 (C<sub>36</sub>H<sub>33</sub>F<sub>3</sub>N<sub>5</sub>O<sub>2</sub><sup>+</sup>), Found 624.2573.

**6-(4-(4-(dimethylamino)phenyl)-1H-1,2,3-triazol-1-yl)-1,13-dimethoxy-5,9-dipropyl-5,9-dihydro-13bH-quinolino[2,3,4-kl]acridin-13b-ylum tetrafluoroborate (10c)**

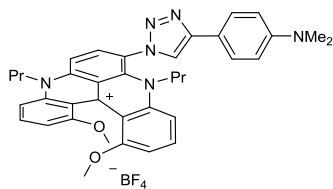

Prepared according to general procedure using 4-ethynyl-*N,N*-dimethylaniline (34 mg, 0.25 mmol). The reaction mixture was stirred for 24 h. Purification by selective precipitation with CH<sub>2</sub>Cl<sub>2</sub> and Et<sub>2</sub>O provided the product as a light green solid (34 mg, 99%).

**R<sub>f</sub>** = 0.3 (SiO<sub>2</sub>, CH<sub>2</sub>Cl<sub>2</sub>/MeOH, 98:2). **M. P.:** 208-210 °C (decomposition). **<sup>1</sup>H NMR (400 MHz, CD<sub>2</sub>Cl<sub>2</sub>):**  $\delta = 8.25 - 8.17$  (m, 2H, CH), 8.05 (t,  $J = 8.5$  Hz, 1H, CH), 7.85 (t,  $J = 8.3$  Hz, 1H, CH), 7.80 (d,  $J = 8.5$  Hz, 2H, CH), 7.70 (d,  $J = 9.3$  Hz, 1H, CH), 7.52 (d,  $J = 9.0$  Hz, 1H, CH), 7.28 (d,  $J = 8.7$  Hz, 1H, CH), 7.00 (d,  $J = 8.1$  Hz, 1H, CH), 6.90 (d,  $J = 8.2$  Hz, 1H, CH), 6.80 (d,  $J = 8.4$  Hz, 2H, CH), 4.80 – 4.70 (m, 1H, CH), 4.62 – 4.51 (m, 1H, CH), 4.26 – 4.18 (m, 1H, CH), 3.80 (s, 3H, OCH<sub>3</sub>), 3.77 (s, 3H, OCH<sub>3</sub>), 3.14 – 3.05 (m, 1H, CH), 3.00 (s, 6H, CH<sub>3</sub>), 2.32 – 2.13 (m, 2H, CH<sub>2</sub>), 1.65 – 1.43 (m, 2H, CH<sub>2</sub>), 1.29 (t,  $J = 7.3$  Hz, 3H, CH<sub>3</sub>), 0.37 (t,  $J = 7.3$  Hz, 3H, CH<sub>3</sub>). **<sup>13</sup>C{<sup>1</sup>H} NMR (101 MHz, CD<sub>2</sub>Cl<sub>2</sub>):**  $\delta = 160.2$  (C), 159.6 (C), 151.4 (C), 150.0 (C), 144.0 (C), 143.2 (C), 142.4 (C), 138.9 (CH), 138.8 (C), 137.6 (CH), 135.7 (C), 135.7 (CH), 127.3 (CH), 121.8 (C), 120.2 (CH), 119.3 (C), 117.9 (C), 116.8 (C), 114.6 (C), 112.8 (CH), 109.8 (CH), 108.1 (CH), 107.4 (CH), 104.7 (CH), 104.4 (CH), 56.5 (OCH<sub>3</sub>), 56.3 (OCH<sub>3</sub>), 53.7 (CH<sub>2</sub>), 40.7 (NCH<sub>3</sub>), 22.5 (CH<sub>2</sub>), 21.0 (CH<sub>2</sub>), 11.4 (CH<sub>3</sub>), 10.9 (CH<sub>3</sub>). **<sup>19</sup>F NMR (282 MHz, CD<sub>2</sub>Cl<sub>2</sub>):**  $\delta = -152.3$ . **UV-Vis:**  $\lambda_{\max}$  (CH<sub>3</sub>CN) = 607 nm ( $\epsilon = 11520$  L.mol<sup>-1</sup>.cm<sup>-1</sup>). **IR (CH<sub>2</sub>Cl<sub>2</sub>, cm<sup>-1</sup>):**  $\nu = 3130, 2955, 1603, 1586, 1506, 1349, 1264, 1169, 1055, 946, 816, 778, 747, 644$ . **HRMS (ESI+)** calculated for [M<sup>+</sup>]: 599.3129 (C<sub>37</sub>H<sub>39</sub>N<sub>6</sub>O<sub>2</sub><sup>+</sup>), Found 599.3155.

**6-cyano-1,13-dimethoxy-5,9-dipropyl-5,9-dihydro-13bH-quinolino[2,3,4-kl]acridin-13b-ylium tetrafluoroborate (11)**

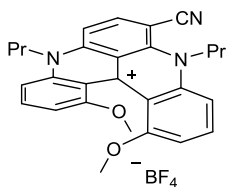

To a solution of salt **6** (25 mg, 0.05 mmol) and NaN<sub>3</sub> (4.6 mg, 0.07 mmol) in MeCN (95 μL, 0.05 M), was added TfOH (12.53 μL, 0.14 mmol). The resulting mixture was stirred for 5 min at 25 °C (monitored by ESI-MS). Then, the mixture was extracted with CH<sub>2</sub>Cl<sub>2</sub> (3 x 10 mL) and the organic layer was washed with HBF<sub>4</sub> 1 M in H<sub>2</sub>O, dried over Na<sub>2</sub>SO<sub>4</sub>, filtered and evaporated under *vacuum*. The crude material was

purified by selective precipitation with CH<sub>2</sub>Cl<sub>2</sub> and Et<sub>2</sub>O and flash chromatography on silica gel (CH<sub>2</sub>Cl<sub>2</sub>/MeOH, 98:2). The desired product is obtained as a purple solid (17.4 mg, 70%).

**R<sub>f</sub>** = 0.3 (SiO<sub>2</sub>, CH<sub>2</sub>Cl<sub>2</sub>/MeOH, 98:2). **M. P.:** 261-263 °C (decomposition). **<sup>1</sup>H NMR (400 MHz, CD<sub>2</sub>Cl<sub>2</sub>):** δ = 8.35 (d, *J* = 9.1 Hz, 1H, CH), 8.08 (t, *J* = 8.4, 1H, CH), 7.98 (t, *J* = 8.4, 1H, CH), 7.71 (d, *J* = 9.1 Hz, 1H, CH), 7.60 (d, *J* = 8.9 Hz, 1H, CH), 7.50 (d, *J* = 9.2 Hz, 1H), 7.04 (d, *J* = 8.1 Hz, 1H), 6.97 (d, *J* = 8.2 Hz, 1H), 5.01 – 4.95 (m, 2H, CH), 4.86 – 4.77 (m, 1H, CH), 4.65 – 4.56 (m, 1H, CH), 3.80 (s, 3H, OCH<sub>3</sub>), 3.77 (s, 3H, OCH<sub>3</sub>), 2.25 – 2.13 (m, 2H, CH<sub>2</sub>), 2.10 – 1.98 (m, 2H, CH<sub>2</sub>), 1.28 (t, *J* = 7.4 Hz, 3H, CH<sub>3</sub>), 0.84 (t, *J* = 7.3 Hz, 3H, CH<sub>3</sub>). **<sup>13</sup>C{<sup>1</sup>H} NMR (101 MHz, CD<sub>2</sub>Cl<sub>2</sub>):** δ = 160.1 (C), 159.7 (C), 142.8 (C), 142.7 (C), 142.3 (C), 142.2 (CH), 141.9 (C), 141.3 (C), 139.3 (CH), 138.3 (CH), 120.0 (C), 118.5 (C), 115.9 (C), 114.5 (C), 109.3 (CH), 108.3 (CH), 107.7 (CH), 105.3 (CH), 105.0 (CH), 91.0 (CN), 56.6 (OCH<sub>3</sub>), 56.5 (OCH<sub>3</sub>), 55.4 (CH<sub>2</sub>), 22.8 (CH<sub>2</sub>), 21.0 (CH<sub>2</sub>), 11.4 (CH<sub>3</sub>), 10.6 (CH<sub>3</sub>). **<sup>19</sup>F NMR (282 MHz, CD<sub>2</sub>Cl<sub>2</sub>):** δ = -152.0. **UV-Vis:** λ<sub>max</sub> (CH<sub>3</sub>CN) = 585 nm (ε = 12880 L·mol<sup>-1</sup>·cm<sup>-1</sup>). **IR (CH<sub>2</sub>Cl<sub>2</sub>, cm<sup>-1</sup>):** ν = 3097, 2932, 2217, 1588, 1501, 1466, 1324, 1260, 1132, 1027, 864, 814, 781, 633. **HRMS (ESI+)** calculated for [M<sup>+</sup>]: 438.2176 (C<sub>28</sub>H<sub>28</sub>N<sub>3</sub>O<sub>2</sub><sup>+</sup>), Found 438.2170.

**6-(2,2-dicyanovinyl)-1,13-dimethoxy-5,9-dipropyl-5,9-dihydro-13bH-quinolino[2,3,4-kl]acridin-13b-ylium tetrafluoroborate (12)**

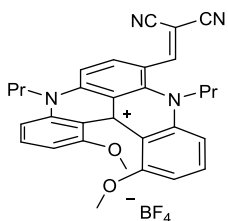

To a solution of salt **3** (25 mg, 0.05 mmol) and malononitrile (9.4 mg, 0.14 mmol) in MeCN (10 μL, 3 M), was added Ph<sub>3</sub>P (2.5 mg, 0.01 mmol). The obtained mixture was heated in the MW at 130 °C. The crude material was purified by selective precipitation with CH<sub>2</sub>Cl<sub>2</sub> and Et<sub>2</sub>O. The desired product is obtained as a green solid (25.6 mg, 94%).

**R<sub>f</sub>** = 0.3 (SiO<sub>2</sub>, CH<sub>2</sub>Cl<sub>2</sub>/MeOH, 98:2). **M. P.:** 283-285 °C (decomposition). **<sup>1</sup>H NMR (400 MHz, CD<sub>2</sub>Cl<sub>2</sub>):** δ = 8.70 (d, *J* = 9.3 Hz, 1H, CH), 8.16 – 8.06 (m, 2H, CH), 7.97 (t, *J* = 8.4 Hz, 1H, CH), 7.68 (d, *J* = 9.4 Hz, 1H, CH), 7.60 – 7.53 (m, 2H, CH), 7.07 (d, *J* = 8.1 Hz, 1H, CH), 6.98 (d, *J* = 8.2 Hz, 1H, CH), 5.19 – 5.08 (m, 1H, CH), 4.86 – 4.73 (m, 1H, CH), 4.67 – 4.54 (m, 1H, CH), 4.21 – 4.10 (m, 1H, CH), 3.82 (s, 3H, CH<sub>3</sub>), 3.78 (s, 3H, CH<sub>3</sub>), 2.30 – 2.15 (m, 2H, CH<sub>2</sub>), 1.80 – 1.69 (m, 2H, CH<sub>2</sub>), 1.30 (t, *J* = 7.4 Hz, 3H, CH<sub>3</sub>), 0.43 (t, *J* = 7.3 Hz, 3H, CH<sub>3</sub>). **<sup>13</sup>C{<sup>1</sup>H} NMR (101 MHz, CD<sub>2</sub>Cl<sub>2</sub>):** δ 160.3 (C), 159.6 (C), 156.5 (CH), 143.4 (C), 142.6 (C), 142.3 (C), 141.8 (C), 140.9 (C), 139.5 (CH), 137.9 (CH), 137.4 (CH), 120.3 (C), 117.2 (C), 114.7 (C), 114.3 (C), 113.3 (C), 112.8 (C), 111.1 (C), 108.2 (CH), 108.1 (CH), 105.6 (CH), 105.4 (CH), 82.2 (CH),

60.9 (CH<sub>2</sub>), 56.7 (OCH<sub>3</sub>), 56.5 (OCH<sub>3</sub>), 23.2 (CH<sub>2</sub>), 21.3 (CH<sub>2</sub>), 11.4 (CH<sub>3</sub>), 10.8 (CH<sub>3</sub>). **<sup>19</sup>F NMR (282 MHz, CD<sub>2</sub>Cl<sub>2</sub>):** δ = -152.5. **UV-Vis:** λ<sub>max</sub> (CH<sub>3</sub>CN) = 598 nm (ε = 11550 L.mol<sup>-1</sup>.cm<sup>-1</sup>). **IR (CH<sub>2</sub>Cl<sub>2</sub>, cm<sup>-1</sup>):** ν = 3120, 2968, 2227, 1583, 1503, 1469, 1340, 1287, 1265, 1235, 1117, 1125, 1050, 955, 818, 778, 709, 616. **HRMS (ESI+)** calculated for [M+]: 489.2285 (C<sub>31</sub>H<sub>29</sub>N<sub>4</sub>O<sub>2</sub><sup>+</sup>), Found 489.2285.

#### General procedure for the synthesis of styryl quinacridinium tetrafluoroborate salts [13a-c,e-f].

To a solution of Ph<sub>3</sub>P (1.6 equiv) in CH<sub>2</sub>Cl<sub>2</sub> (0.1 M), was added the corresponding benzyl chloride (1.6 equiv). The reaction mixture was stirred for 30 min. Full conversion to the corresponding phosphonium salt was confirmed by ESI-MS. Then, **6** (25 mg, 0.05 mmol) and NaH (2 equiv) were added to the reaction mixture at 0 °C. The reaction was allowed to reach 25 °C and stirred for 30 min to 4 h (monitored by ESI-MS). Then, the mixture was extracted with CH<sub>2</sub>Cl<sub>2</sub> (3 x 10 mL) and the organic layer was washed with HBF<sub>4</sub> 1 M in H<sub>2</sub>O, dried over Na<sub>2</sub>SO<sub>4</sub>, filtered and evaporated under *vacuum*. The crude product was precipitated in Et<sub>2</sub>O. The crude precipitate was filtered and purified by dissolving it in a minimum amount of CH<sub>2</sub>Cl<sub>2</sub> and then the addition of pentane led to the precipitation of the desired product, which was separated from the mother liquor by centrifugation. Desired products were further purified by flash chromatography (CH<sub>2</sub>Cl<sub>2</sub>/MeOH, 98:2) as light green solids.

#### (E)-1,13-dimethoxy-5,9-dipropyl-6-styryl-5,9-dihydro-13bH-quinolino[2,3,4-kl]acridin-13b-ylium tetrafluoroborate (13a)

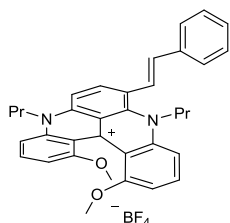

Prepared according to general procedure using benzyl bromide (13.7 mg, 0.08 mmol). The reaction mixture was stirred for 30 min after addition of the aldehyde and NaH. Purification by selective precipitation with CH<sub>2</sub>Cl<sub>2</sub> and pentane and flash chromatography provided the product as a light green solid (28.0 mg, 98%).

**R<sub>f</sub>** = 0.5 (SiO<sub>2</sub>, CH<sub>2</sub>Cl<sub>2</sub>/MeOH, 98:2). **M. P.:** 170-172 °C (decomposition). **<sup>1</sup>H NMR (400 MHz, CD<sub>2</sub>Cl<sub>2</sub>):** δ = 8.37 (d, *J* = 8.0 Hz 1H, CH), 7.98 (t, *J* = 8.5 Hz, 1H, CH), 7.86 (t, *J* = 8.3 Hz, 1H, CH), 7.69 – 7.60 (m, 3H, CH), 7.47 – 7.42 (m, 4H, CH), 7.37 – 7.26 (m, 3H, CH), 6.94 (d, *J* = 8.1 Hz, 1H), 6.85 (d, *J* = 8.1 Hz, 1H), 4.85 – 4.66 (m, 2H, CH), 4.61 – 4.47 (m, 2H, CH), 3.80 (s, 3H, CH<sub>3</sub>), 3.76 (s, 3H, CH<sub>3</sub>), 2.32 – 2.09 (m, 2H, CH<sub>2</sub>), 1.69 – 1.61 (m, 2H, CH<sub>2</sub>), 1.29 (t, *J* = 7.4 Hz, 3H, CH<sub>3</sub>), 0.39 (t, *J* = 7.3 Hz, 3H, CH<sub>3</sub>). **<sup>13</sup>C{<sup>1</sup>H} NMR (101 MHz, CD<sub>2</sub>Cl<sub>2</sub>):** δ = 160.2 (C), 159.7 (C), 144.9 (C), 142.8 (C), 142.2 (C), 139.4 (C), 138.1 (CH), 137.5 (C), 137.3 (CH), 136.9 (CH), 131.1 (CH), 129.5 (CH), 129.0 (CH), 127.2 (CH), 125.8 (CH), 121.9 (C), 120.5 (C), 117.1 (C), 114.4 (C), 110.4 (CH), 108.0 (CH), 107.4 (CH), 104.1 (CH), 103.8 (CH), 57.0 (CH<sub>2</sub>), 56.4 (OCH<sub>3</sub>), 56.2 (OCH<sub>3</sub>), 22.8 (CH<sub>2</sub>), 21.1 (CH<sub>2</sub>), 11.4 (CH<sub>3</sub>), 10.9 (CH<sub>3</sub>). **<sup>19</sup>F NMR (282 MHz, CD<sub>2</sub>Cl<sub>2</sub>):** δ = -152.5. **UV-Vis:** λ<sub>max</sub> (CH<sub>3</sub>CN) = 638 nm (ε = 6710 L.mol<sup>-1</sup>.cm<sup>-1</sup>). **IR (CH<sub>2</sub>Cl<sub>2</sub>, cm<sup>-1</sup>):** ν = 2965, 2878, 1587, 1502, 1469, 1340, 1256, 1170, 1127, 1052, 816, 779, 695. **HRMS (ESI+)** calculated for [M+]: 515.2693 (C<sub>35</sub>H<sub>35</sub>N<sub>2</sub>O<sub>2</sub><sup>+</sup>), Found 515.2693.

**(E)-1,13-dimethoxy-6-(4-nitrostyryl)-5,9-dipropyl-5,9-dihydro-13bH-quinolino[2,3,4-kl]acridin-13b-ylium tetrafluoroborate (13b)**

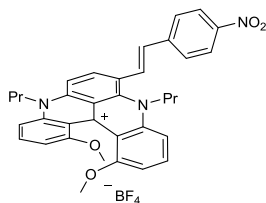

Prepared according to general procedure using *p*-NO<sub>2</sub>-benzyl bromide (17.3 mg, 0.08 mmol). The reaction mixture was stirred for 4 h after addition of the aldehyde and NaH. Purification by selective precipitation with CH<sub>2</sub>Cl<sub>2</sub> and pentane and flash chromatography provided the product as a light green solid (19.3 mg, 63%).

**R<sub>f</sub>** = 0.5 (SiO<sub>2</sub>, CH<sub>2</sub>Cl<sub>2</sub>/MeOH, 98:2). **M. P.:** 167-169 °C (decomposition). **<sup>1</sup>H NMR**

**(400 MHz, CD<sub>2</sub>Cl<sub>2</sub>):** δ = 8.41 (d, *J* = 9.1 Hz, 1H), 8.28 – 8.25 (m, 2H, CH), 7.99 (t, *J* = 8.9, 8.0 Hz, 1H, CH), 7.89 (t, *J* = 8.4 Hz, 1H, CH), 7.83 – 7.76 (m, 2H, CH), 7.67 (d, *J* = 9.1 Hz, 1H, CH), 7.57 – 7.45 (m, 3H, CH), 7.35 (d, *J* = 16.2 Hz, 1H, CH), 6.95 (d, *J* = 8.0 Hz, 1H, CH), 6.87 (d, *J* = 8.1 Hz, 1H, CH), 4.93 – 4.84 (m, 1H, CH), 4.78 – 4.67 (m, 1H, CH), 4.61 – 4.41 (m, 2H, CH), 2.33 – 2.11 (m, 2H, CH<sub>2</sub>), 1.73 – 1.58 (m, 2H, CH<sub>2</sub>), 1.29 (t, *J* = 7.4 Hz, 3H, CH<sub>3</sub>), 0.38 (t, *J* = 7.3 Hz, 3H, CH<sub>3</sub>). **<sup>13</sup>C{<sup>1</sup>H} NMR (101 MHz, CD<sub>2</sub>Cl<sub>2</sub>):** δ = 160.2 (C), 159.7 (C), 147.8 (C), 144.6 (C), 143.8 (C), 142.8 (C), 142.2 (C), 140.1 (C), 138.3 (CH), 138.0 (C), 137.4 (CH), 137.1 (CH), 130.1 (CH), 128.5 (CH), 127.8 (CH), 124.8 (CH), 121.7 (C), 119.4 (C), 117.1 (C), 114.5 (C), 110.5 (C), 108.0 (CH), 107.6 (CH), 104.3 (CH), 104.0 (CH), 57.7 (CH<sub>2</sub>), 56.5 (OCH<sub>3</sub>), 56.2 (OCH<sub>3</sub>), 22.8 (CH<sub>2</sub>), 21.1 (CH<sub>2</sub>), 11.5 (CH<sub>3</sub>), 10.9 (CH<sub>3</sub>). **<sup>19</sup>F NMR (282 MHz, CD<sub>2</sub>Cl<sub>2</sub>):** δ = -152.4. **UV-Vis:** λ<sub>max</sub> (CH<sub>3</sub>CN) = 638 nm (ε = 8090 L.mol<sup>-1</sup>.cm<sup>-1</sup>). **IR (CH<sub>2</sub>Cl<sub>2</sub>, cm<sup>-1</sup>):** ν = 2965, 2878, 1585, 1510, 1470, 1338, 1258, 1170, 1127, 1055, 817, 779, 745. **HRMS (ESI+)** calculated for [M<sup>+</sup>]: 560.2544 (C<sub>35</sub>H<sub>34</sub>N<sub>3</sub>O<sub>4</sub><sup>+</sup>), Found 515.2543.

**(E)-1,13-dimethoxy-5,9-dipropyl-6-(4-(trifluoromethyl)styryl)-5,9-dihydro-13bH-quinolino[2,3,4-kl]acridin-13b-ylium tetrafluoroborate (13c)**

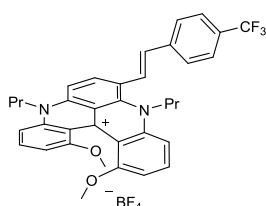

Prepared according to general procedure using *p*-CF<sub>3</sub>-benzyl bromide (19.1 mg, 0.08 mmol). The reaction mixture was stirred for 4 h after addition of the aldehyde and NaH. Purification by selective precipitation with CH<sub>2</sub>Cl<sub>2</sub> and pentane and flash chromatography provided the product as a light green solid (15.2 mg, 55%).

**R<sub>f</sub>** = 0.3 (SiO<sub>2</sub>, CH<sub>2</sub>Cl<sub>2</sub>/MeOH, 98:2). **M. P.:** 271-273 °C (decomposition). **<sup>1</sup>H NMR**

**(400 MHz, CD<sub>2</sub>Cl<sub>2</sub>):** δ = 8.39 (d, *J* = 9.0 Hz, 1H, CH), 7.98 (t, *J* = 9.0, 8.0 Hz, 1H, CH), 7.87 (t, *J* = 8.4 Hz, 1H, CH), 7.77 (d, *J* = 8.2 Hz, 2H, CH), 7.73 – 7.62 (m, 3H, CH), 7.51 – 7.40 (m, 3H, CH), 7.32 (d, *J* = 16.2 Hz, 1H, CH), 6.95 (d, *J* = 8.0 Hz, 1H, CH), 6.86 (d, *J* = 8.1 Hz, 1H, CH), 4.88 – 4.79 (m, 1H, CH), 4.78 – 4.66 (m, 1H, CH), 4.60 – 4.44 (m, 2H, CH), 3.80 (s, 3H, CH<sub>3</sub>), 3.76 (s, 3H, CH<sub>3</sub>), 2.35 – 2.10 (m, 2H, CH<sub>2</sub>), 1.73 – 1.57 (m, 2H, CH<sub>2</sub>), 1.28 (t, 3H, CH<sub>3</sub>), 0.39 (t, *J* = 7.3 Hz, 3H, CH<sub>3</sub>). **<sup>13</sup>C{<sup>1</sup>H} NMR (101 MHz, CD<sub>2</sub>Cl<sub>2</sub>):** δ = 160.2 (C), 159.7 (C), 144.8 (C), 142.8 (C), 142.2 (C), 141.0 (C), 139.8 (C), 138.3 (CH), 137.8 (C), 137.4 (CH), 137.0 (CH), 130.2 (CF<sub>3</sub>), 129.4 (CH), 128.4 (CH), 127.4 (CH), 121.8 (C), 119.8 (C), 117.1 (C), 114.5 (C), 110.4 (CH), 108.0 (CH), 107.5 (CH), 104.2 (CH), 103.9 (CH), 57.4 (CH<sub>2</sub>), 56.5 (OCH<sub>3</sub>), 56.2 (OCH<sub>3</sub>), 22.8 (CH<sub>2</sub>), 21.1 (CH<sub>2</sub>), 11.5 (CH<sub>3</sub>), 10.9 (CH<sub>3</sub>). **<sup>19</sup>F NMR (282 MHz, CD<sub>2</sub>Cl<sub>2</sub>):** δ = -62.1, -152.5. **UV-Vis:** λ<sub>max</sub> (CH<sub>3</sub>CN) = 640 nm (ε = 8810 L.mol<sup>-1</sup>.cm<sup>-1</sup>). **IR (CH<sub>2</sub>Cl<sub>2</sub>, cm<sup>-1</sup>):** ν = 2960, 2878, 1591, 1504, 1470, 1323,

1256, 1169, 1124, 1066, 817, 779, 750. **HRMS (ESI+)** calculated for [M+]: 583.2567 (C<sub>36</sub>H<sub>34</sub>F<sub>3</sub>N<sub>2</sub>O<sub>4</sub><sup>+</sup>), Found 583.2586.

**(E)-6-(4-aminostyryl)-1,13-dimethoxy-5,9-dipropyl-5,9-dihydro-13bH-quinolino[2,3,4-kl]acridin-13b-ylidium tetrafluoroborate (13d)**

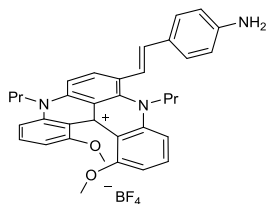

To a solution of **13b** (15 mg, 0.02 mmol) and CH<sub>3</sub>COOH (20.0 μl, 0.35 mmol) in CH<sub>2</sub>Cl<sub>2</sub> (20.0 μl, 1.2 M), was added Zn powder (8.0 mg, 0.12 mmol). The reaction mixture was stirred for 3 h at 25 °C. Purification by selective precipitation with CH<sub>2</sub>Cl<sub>2</sub> and pentane and flash chromatography provided the product as a light green solid (14 mg, 98%).

**R<sub>f</sub>** = 0.5 (SiO<sub>2</sub>, CH<sub>2</sub>Cl<sub>2</sub>/MeOH, 98:2). **M. P.:** 290-292 °C (decomposition). **<sup>1</sup>H NMR (400 MHz, CD<sub>2</sub>Cl<sub>2</sub>):** δ = 8.32 (d, *J* = 9.0 Hz, 1H, CH), 7.95 (t, *J* = 8.9, 8.0 Hz, 1H, CH), 7.83 (t, *J* = 8.4 Hz, 1H, CH), 7.59 (d, *J* = 9.0 Hz, 1H, CH), 7.49 – 7.36 (m, 4H, CH), 7.16 (d, *J* = 16.1 Hz, 1H, CH), 7.05 (d, *J* = 16.2 Hz, 1H, CH), 6.92 (d, *J* = 8.0 Hz, 1H, CH), 6.83 (d, *J* = 8.1 Hz, 1H, CH), 6.78 – 6.67 (m, 2H, CH), 4.80 – 4.63 (m, 2H, CH), 4.62 – 4.43 (m, 2H, CH), 3.79 (s, 3H, CH<sub>3</sub>), 3.75 (s, 3H, CH<sub>3</sub>), 3.55 – 2.81 (m, 2H, NH<sub>2</sub>), 2.31 – 2.08 (m, 2H, CH<sub>2</sub>), 1.70 – 1.51 (m, 2H, CH<sub>2</sub>), 1.28 (t, *J* = 7.3 Hz, 3H, CH<sub>3</sub>), 0.38 (t, *J* = 7.3 Hz, 3H, CH<sub>3</sub>). **<sup>13</sup>C{<sup>1</sup>H} NMR (101 MHz, CD<sub>2</sub>Cl<sub>2</sub>):** δ = 160.2 (C), 159.7 (C), 148.2 (C), 145.3 (C), 142.9 (C), 142.2 (C), 138.9 (C), 137.9 (CH), 137.1 (CH), 137.0 (C), 136.8 (CH), 131.4 (CH), 128.6 (CH), 127.3 (C), 122.1 (C), 121.6 (CH), 121.5 (C), 117.1 (C), 115.5 (CH), 114.4 (C), 110.3 (CH), 108.0 (CH), 107.3 (CH), 104.0 (CH), 103.6 (CH), 56.5 (CH<sub>2</sub>), 56.4 (OCH<sub>3</sub>), 56.6 (OCH<sub>3</sub>), 22.7 (CH<sub>2</sub>), 21.0 (CH<sub>2</sub>), 11.5 (CH<sub>3</sub>), 10.9 (CH<sub>3</sub>). **<sup>19</sup>F NMR (282 MHz, CD<sub>2</sub>Cl<sub>2</sub>):** δ = -151.5. **UV-Vis:** λ<sub>max</sub> (CH<sub>3</sub>CN) = 660 nm (ε = 5600 L·mol<sup>-1</sup>·cm<sup>-1</sup>). **IR (CH<sub>2</sub>Cl<sub>2</sub>, cm<sup>-1</sup>):** ν = 3380, 2935, 2878, 1580, 1512, 1466, 1339, 1254, 1168, 1126, 1038, 814, 775, 730. **HRMS (ESI+)** calculated for [M+]: 530.2802 (C<sub>35</sub>H<sub>36</sub>N<sub>3</sub>O<sub>2</sub><sup>+</sup>), Found 530.2804.

**(E)-6-(3,5-bis(trifluoromethyl)styryl)-1,13-dimethoxy-5,9-dipropyl-5,9-dihydro-13bH-quinolino[2,3,4-kl]acridin-13b-ylidium tetrafluoroborate (13e)**

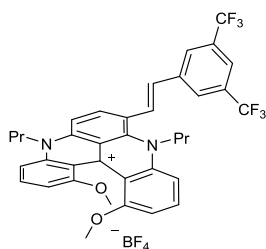

Prepared according to general procedure using *m*-di(CF<sub>3</sub>)-benzyl chloride (21.0 mg, 0.08 mmol). The reaction mixture was stirred for 2 h after addition of the aldehyde and NaH. Purification by selective precipitation with CH<sub>2</sub>Cl<sub>2</sub> and pentane and flash chromatography provided the product as a light green solid (22.7 mg, 65%).

**R<sub>f</sub>** = 0.4 (SiO<sub>2</sub>, CH<sub>2</sub>Cl<sub>2</sub>/MeOH, 98:2). **M. P.:** 223-225 °C (decomposition). **<sup>1</sup>H NMR (400 MHz, CD<sub>2</sub>Cl<sub>2</sub>):** δ = 8.38 (d, *J* = 9.1 Hz, 1H, CH), 8.07 (s, 2H, CH), 8.00 (t, *J* = 8.9, 8.0 Hz, 1H, CH), 7.92 – 7.84 (m, 2H, CH), 7.68 (d, *J* = 9.1 Hz, 1H, CH), 7.52 – 7.44 (m, 3H, CH), 7.35 (d, *J* = 16.2 Hz, 1H, CH), 6.96 (d, *J* = 8.0 Hz, 1H, CH), 6.87 (d, *J* = 8.1 Hz, 1H, CH), 4.89 – 4.79 (m, 1H, CH), 4.79 – 4.67 (m, 1H, CH), 4.62 – 4.40 (m, 2H, CH), 3.80 (s, 3H, CH<sub>3</sub>), 3.76 (s, 3H, CH<sub>3</sub>), 2.33 – 2.11 (m, 2H, CH<sub>2</sub>), 1.72 – 1.58 (m, 2H, CH<sub>2</sub>), 1.29 (t, *J* = 7.4 Hz, 3H, CH<sub>3</sub>), 0.39 (t, *J* = 7.3 Hz, 3H, CH<sub>3</sub>). **<sup>13</sup>C{<sup>1</sup>H} NMR (101 MHz,**



**CD<sub>2</sub>Cl<sub>2</sub>**):  $\delta$  = 160.2 (C), 159.8 (C), 144.6 (C), 142.8 (C), 142.2 (C), 140.0 (C), 139.7 (C), 138.4 (CH), 138.1 (C), 137.6 (CH), 137.1 (CH), 132.7 (CF<sub>3</sub>), 129.7 (CH), 127.9 (CH), 127.1 (CH), 125.3 (C), 122.6 (C), 121.7 (C), 119.2 (C), 117.1 (C), 114.5 (C), 110.4 (CH), 108.0 (CH), 107.7 (CH), 104.3 (CH), 104.0 (CH), 57.6 (CH<sub>2</sub>), 56.5 (OCH<sub>3</sub>), 56.2 (OCH<sub>3</sub>), 22.8 (CH<sub>2</sub>), 21.1 (CH<sub>2</sub>), 11.5 (CH<sub>3</sub>), 10.9 (CH<sub>3</sub>). **<sup>19</sup>F NMR (282 MHz, CD<sub>2</sub>Cl<sub>2</sub>)**  $\delta$  = -62.6, -152.5. **UV-Vis:**  $\lambda_{\text{max}}$  (CH<sub>3</sub>CN) = 636 nm ( $\epsilon$  = 8750 L.mol<sup>-1</sup>.cm<sup>-1</sup>). **IR (CH<sub>2</sub>Cl<sub>2</sub>, cm<sup>-1</sup>):**  $\nu$  = 2967, 2881, 1585, 1502, 1468, 1376, 1277, 1169, 1125, 1039, 941, 894, 816, 778, 732. **HRMS (ESI+)** calculated for [M<sup>+</sup>]: 651.2441 (C<sub>37</sub>H<sub>33</sub>F<sub>6</sub>N<sub>2</sub>O<sub>2</sub><sup>+</sup>), Found 651.2415.

**(E)-6-(3,5-dimethoxystyryl)-1,13-dimethoxy-5,9-dipropyl-5,9-dihydro-13bH-quinolino[2,3,4-kl]acridin-13b-ylium tetrafluoroborate (13f)**

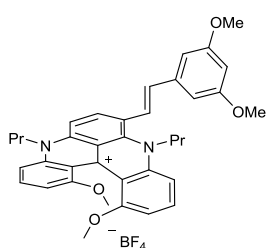

Prepared according to general procedure using *m*-di(OMe)-benzyl bromide (14.1 mg, 0.08 mmol). The reaction mixture was stirred for 2 h after addition of the aldehyde and NaH. Purification by selective precipitation with CH<sub>2</sub>Cl<sub>2</sub> and pentane and flash chromatography provided the product as a light green solid (21.9 mg, 70%).

**R<sub>f</sub>** = 0.5 (SiO<sub>2</sub>, CH<sub>2</sub>Cl<sub>2</sub>/MeOH, 98:2). **M. P.:** 186-188 °C (decomposition). **<sup>1</sup>H NMR (400 MHz, CD<sub>2</sub>Cl<sub>2</sub>):**  $\delta$  = 8.35 (d,  $J$  = 9.0 Hz, 1H, CH), 7.97 (t,  $J$  = 8.0 Hz, 1H, CH), 7.86 (t,  $J$  = 8.4 Hz, 1H, CH), 7.64 (d,  $J$  = 9.0 Hz, 1H, CH), 7.49 – 7.40 (m, 2H, CH), 7.29 (d,  $J$  = 16.2 Hz, 1H, CH), 7.19 (d,  $J$  = 16.1 Hz, 1H, CH), 6.94 (d,  $J$  = 8.1 Hz, 1H, CH), 6.85 (d,  $J$  = 8.1 Hz, 1H, CH), 6.77 (s, 2H, CH), 6.47 (s, 1H, CH), 4.84 – 4.65 (m, 2H, CH), 4.59 – 4.47 (m, 2H, CH), 3.85 (s, 6H, CH<sub>3</sub>), 3.80 (s, 3H, CH<sub>3</sub>), 3.76 (s, 3H, CH<sub>3</sub>), 2.31 – 2.10 (m, 2H, CH<sub>2</sub>), 1.71 – 1.52 (m, 2H, CH<sub>2</sub>), 1.29 (t,  $J$  = 7.4 Hz, 3H, CH<sub>3</sub>), 0.38 (t,  $J$  = 7.3 Hz, 3H, CH<sub>3</sub>). **<sup>13</sup>C{<sup>1</sup>H} NMR (101 MHz, CD<sub>2</sub>Cl<sub>2</sub>):**  $\delta$  = 161.8 (C), 160.2 (C), 159.7 (C), 144.9 (C), 142.8 (C), 142.2 (C), 139.4 (C), 139.3 (C), 138.1 (CH), 137.5 (C), 137.4 (CH), 136.9 (CH), 131.1 (CH), 126.3 (CH), 121.8 (C), 120.3 (C), 117.0 (C), 114.4 (C), 110.4 (CH), 108.0 (CH), 107.5 (CH), 105.4 (CH), 104.1 (CH), 103.8 (CH), 100.7 (CH), 57.0 (CH<sub>2</sub>), 56.4 (OCH<sub>3</sub>), 56.2 (OCH<sub>3</sub>), 56.0 (OCH<sub>3</sub>), 22.8 (CH<sub>2</sub>), 21.1 (CH<sub>2</sub>), 11.4 (CH<sub>3</sub>), 10.9 (CH<sub>3</sub>). **<sup>19</sup>F NMR (282 MHz, CD<sub>2</sub>Cl<sub>2</sub>):**  $\delta$  = -152.5. **UV-Vis:**  $\lambda_{\text{max}}$  (CH<sub>3</sub>CN) = 644 nm ( $\epsilon$  = 7960 L.mol<sup>-1</sup>.cm<sup>-1</sup>). **IR (CH<sub>2</sub>Cl<sub>2</sub>, cm<sup>-1</sup>):**  $\nu$  = 2938, 2879, 1582, 1500, 1463, 1320, 1260, 1169, 1152, 1040, 815, 777, 731. **HRMS (ESI+)** calculated for [M<sup>+</sup>]: 575.2904 (C<sub>37</sub>H<sub>39</sub>N<sub>2</sub>O<sub>4</sub><sup>+</sup>), Found 579.2886.

**6-hydroxy-1,13-dimethoxy-5,9-dipropyl-5,9-dihydro-13bH-quinolino[2,3,4-kl]acridin-13b-ylium tetrafluoroborate (14)**

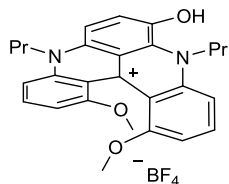

Compound **6** (400 mg, 0.76 mmol, 1 equiv) was dissolved in 5 mL of CH<sub>2</sub>Cl<sub>2</sub>. To this solution was added 3-chloroperbenzoic acid (653 mg, 3.79 mmol, 5 equiv) and the reaction was stirred for 2 h at 25 °C. The crude mixture was diluted in CH<sub>2</sub>Cl<sub>2</sub> and washed twice with an aqueous saturated solution of NaHCO<sub>3</sub>, an aqueous diluted solution of HBF<sub>4</sub>, then dried over Na<sub>2</sub>SO<sub>4</sub>, filtered and finally evaporated. Several

purifications on neutral alumina (CH<sub>2</sub>Cl<sub>2</sub>/MeOH, 95:5) afforded the pure product as a green solid (306 mg, 78%).

**R<sub>f</sub>** = 0.4 (Neutral alumina, CH<sub>2</sub>Cl<sub>2</sub>/MeOH, 95:5). **M. P.:** 154-156 °C (decomposition: 176-178 °C). **<sup>1</sup>H NMR (CD<sub>2</sub>Cl<sub>2</sub>, 500 MHz):** δ = 11.63 (s, 1H, OH), 8.69 (d, *J* = 9.2 Hz, 1H, CH), 7.78 (t, *J* = 8.9 Hz, 1H, CH), 7.68 (t, *J* = 8.8 Hz, 1H, CH), 7.38 (d, *J* = 9.2 Hz, 1H, CH), 7.31 (dd, *J* = 8.9, 1.0 Hz, 1H, CH), 7.25 (dd, *J* = 9.2, 1.0 Hz, 1H, CH), 6.73 (d, *J* = 8.1 Hz, 1H, CH), 6.65 (dd, *J* = 8.1, 1.0 Hz, 1H, CH), 5.08 – 5.02 (m, 1H, CH<sub>2</sub>), 4.64 – 4.58 (m, 1H, CH<sub>2</sub>), 4.55 – 4.48 (m, 1H, CH<sub>2</sub>), 4.36 – 4.23 (m, 1H, CH<sub>2</sub>), 3.72 (s, 3H, OCH<sub>3</sub>), 3.67 (s, 3H, OCH<sub>3</sub>), 2.17 – 2.01 (m, 2H, CH<sub>2</sub>), 1.94 – 1.76 (m, 2H, CH<sub>2</sub>), 1.20 (t, *J* = 7.3 Hz, 3H, CH<sub>3</sub>), 0.74 (t, *J* = 7.3 Hz, 3H, CH<sub>3</sub>). **<sup>13</sup>C{<sup>1</sup>H} NMR (CD<sub>2</sub>Cl<sub>2</sub>, 125 MHz):** δ = 159.8 (C), 159.4 (C), 146.6 (C), 143.3 (C), 142.5 (C), 141.9 (C), 136.5 (CH), 136.2 (CH), 130.9 (C), 127.1 (C), 127.1 (CH), 123.2 (C), 115.8 (C), 113.4 (C), 109.1 (CH), 107.5 (CH), 106.0 (CH), 102.3 (CH), 102.2 (CH), 55.9 (OCH<sub>3</sub>), 55.7 (OCH<sub>3</sub>), 53.7 (CH<sub>2</sub>), 52.0 (CH<sub>2</sub>), 23.3 (CH<sub>2</sub>), 20.4 (CH<sub>2</sub>), 11.3 (CH<sub>3</sub>), 11.2 (CH<sub>3</sub>). **<sup>19</sup>F NMR (CD<sub>2</sub>Cl<sub>2</sub>, 282 MHz):** δ = -150.7. **UV-Vis:** λ<sub>max</sub> (CH<sub>3</sub>CN) = 659 nm (ε = 7450 L.mol<sup>-1</sup>.cm<sup>-1</sup>). **IR (neat, cm<sup>-1</sup>):** ν = 3367, 2940, 1604, 1557, 1500, 1459, 1365, 1304, 1257, 1163, 1127, 1046, 809, 770, 734, 717. **HRMS (ESI+)** calculated for [M+H]<sup>+</sup>: 429.2173 (C<sub>27</sub>H<sub>29</sub>N<sub>2</sub>O<sub>3</sub><sup>+</sup>), Found 429.2159.

### 1,6,13-trimethoxy-5,9-dipropyl-5,9-dihydro-13bH-quinolino[2,3,4-kl]acridin-13b-ylum tetrafluoroborate (15)

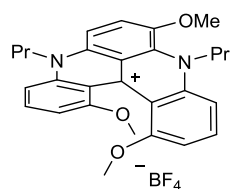

Compound **14** (30 mg, 0.06 mmol, 1 equiv) was dissolved in 2 mL of acetonitrile. To this solution was added K<sub>2</sub>CO<sub>3</sub> (40 mg, 0.29 mmol, 5 equiv) and MeI (11 μL, 0.17 mmol, 3 equiv). The reaction was refluxed for 1 h then the crude mixture was diluted in CH<sub>2</sub>Cl<sub>2</sub> and washed with an aqueous diluted solution of HBF<sub>4</sub>, dried over Na<sub>2</sub>SO<sub>4</sub>, filtered and finally evaporated. Purification by silica column chromatography (CH<sub>2</sub>Cl<sub>2</sub>/MeOH, 95:5) afforded the pure product as a green solid (28 mg, 90%).

**R<sub>f</sub>** = 0.45 (SiO<sub>2</sub>, CH<sub>2</sub>Cl<sub>2</sub>/MeOH, 95:5). **M. P.:** 230-232 °C (decomposition). **<sup>1</sup>H NMR (CD<sub>2</sub>Cl<sub>2</sub>/CD<sub>3</sub>OD 1/1, 500 MHz):** δ = 7.98 (d, *J* = 9.3 Hz, 1H, CH), 7.90 (t, *J* = 8.8 Hz, 1H, CH), 7.81 (t, *J* = 8.8 Hz, 1H, CH), 7.63 (d, *J* = 9.3 Hz, 1H, CH), 7.45 (d, *J* = 8.7 Hz, 1H, CH), 7.42 (d, *J* = 8.9 Hz, 1H, CH), 6.88 (d, *J* = 7.8 Hz, 1H, CH), 6.82 (d, *J* = 8.0 Hz, 1H, CH), 4.85 – 4.81 (m, 1H, CH<sub>2</sub>), 4.72 – 4.63 (m, 2H, CH<sub>2</sub>), 4.49 – 4.43 (m, 1H, CH<sub>2</sub>), 4.11 (s, 3H, OCH<sub>3</sub>), 3.76 (s, 3H, OCH<sub>3</sub>), 3.72 (s, 3H, OCH<sub>3</sub>), 2.23 – 2.06 (m, 2H, CH<sub>2</sub>), 2.89 – 1.78 (m, 2H, CH<sub>2</sub>), 1.23 (t, *J* = 7.4 Hz, 3H, CH<sub>3</sub>), 0.73 (t, *J* = 7.4 Hz, 3H, CH<sub>3</sub>). **<sup>13</sup>C{<sup>1</sup>H} NMR (CD<sub>2</sub>Cl<sub>2</sub>/CD<sub>3</sub>OD 1/1, 125 MHz):** δ = 160.4 (C), 160.0 (C), 146.6 (C), 143.9 (C), 143.1 (C), 143.0 (C), 138.1 (CH), 137.4 (CH), 133.0 (C), 129.5 (C), 122.8 (C), 122.3 (CH), 116.5 (C), 114.1 (C), 109.5 (CH), 108.1 (CH), 106.9 (CH), 103.5 (CH), 103.4 (CH), 57.8 (OCH<sub>3</sub>), 56.2 (OCH<sub>3</sub>), 56.0 (OCH<sub>3</sub>), 55.2 (CH<sub>2</sub>), 52.4 (CH<sub>2</sub>), 23.5 (CH<sub>2</sub>), 20.8 (CH<sub>2</sub>), 11.36 (CH<sub>3</sub>), 11.2 (CH<sub>3</sub>). **<sup>19</sup>F NMR (CD<sub>2</sub>Cl<sub>2</sub>, 282 MHz):** δ = -152.6. **UV-Vis:** λ<sub>max</sub> (CH<sub>3</sub>CN) = 653 nm (ε = 7750 L.mol<sup>-1</sup>.cm<sup>-1</sup>). **IR (neat, cm<sup>-1</sup>):** ν = 3107, 2953, 1605, 1579, 1559, 1518, 1497, 1470, 1365, 1330,

1260, 1211, 1186, 1164, 1130, 1085, 1038, 995, 964, 903, 862, 808, 793, 775, 735, 714, 675, 626. **HRMS (ESI+)** calculated for [M+]: 443.2329 (C<sub>28</sub>H<sub>31</sub>N<sub>2</sub>O<sub>3</sub><sup>+</sup>), Found 443.2326.

### 1,13-dimethoxy-5,9-dipropyl-5,9-dihydroquinolino[2,3,4-kl]acridin-13b-ylium-6-carboxylate (16)

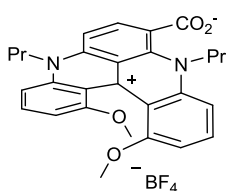

Compound **6** (500 mg, 0.95 mmol, 1 equiv) was dissolved in 20 mL of acetonitrile. To this solution was added separately NaH<sub>2</sub>PO<sub>4</sub> (113 mg, 0.95 mmol, 1 equiv), 1 mL of H<sub>2</sub>O<sub>2</sub> and NaClO<sub>2</sub> (171 mg, 1.89 mmol, 2 equiv). The reaction was stirred for 1 h at 60 °C, then concentrated under reduced pressure. The residue was diluted in CH<sub>2</sub>Cl<sub>2</sub> and washed with aqueous NaBF<sub>4</sub> (0.2 M), water, dried over Na<sub>2</sub>SO<sub>4</sub>, filtered and finally evaporated. Purification by silicagel column chromatography (CH<sub>2</sub>Cl<sub>2</sub>/MeOH, 90:10) afforded the pure product as a green solid (390 mg, 76%).

R<sub>f</sub> = 0.32 (SiO<sub>2</sub>, CH<sub>2</sub>Cl<sub>2</sub>/MeOH, 90:10). **M. P.:** 179-181 °C (decomposition). **<sup>1</sup>H NMR (CD<sub>3</sub>OD, 500 MHz):** δ = 8.50 (d, *J* = 8.7 Hz, 1H, CH), 7.98 (t, *J* = 8.4 Hz, 1H, CH), 7.85 (t, *J* = 8.4 Hz, 1H, CH), 7.64 – 7.53 (m, 3H, CH), 7.05 (d, *J* = 8.0 Hz, 1H, CH), 6.94 (d, *J* = 8.0 Hz, 1H, CH), 5.00 – 4.97 (m, 1H, CH<sub>2</sub>), 4.76 – 4.70 (m, 1H, CH<sub>2</sub>), 4.53 – 4.48 (m, 1H, CH<sub>2</sub>), 4.30 – 4.24 (m, 1H, CH<sub>2</sub>), 3.79 (s, 3H, OCH<sub>3</sub>), 3.73 (s, 3H, OCH<sub>3</sub>), 2.15 – 2.07 (m, 2H, CH<sub>2</sub>), 1.73 – 1.69 (m, 2H, CH<sub>2</sub>), 1.20 (t, *J* = 7.3 Hz, 3H, CH<sub>3</sub>), 0.42 (t, *J* = 7.3 Hz, 3H, CH<sub>2</sub>). **<sup>13</sup>C{<sup>1</sup>H} NMR (CD<sub>3</sub>OD, 125 MHz):** δ = 173.7 (C), 160.9 (C), 160.4 (C), 143.7 (C), 142.9 (C), 142.2 (C), 140.2 (C), 139.6 (C), 139.4 (CH), 138.6 (CH), 137.4 (CH), 121.6 (C), 121.5 (C), 116.9 (C), 114.4 (C), 111.2 (CH), 108.8 (CH), 106.4 (CH), 104.7 (CH), 104.3 (CH), 58.22 (CH<sub>2</sub>), 56.5 (OCH<sub>3</sub>), 56.2 (OCH<sub>3</sub>), 52.7 (CH<sub>2</sub>), 23.1 (CH<sub>2</sub>), 21.2 (CH<sub>2</sub>), 11.1 (CH<sub>3</sub>), 10.8 (CH<sub>3</sub>). **UV-Vis:** λ<sub>max</sub> (CH<sub>3</sub>CN) = 626 nm (ε = 10400 L.mol<sup>-1</sup>.cm<sup>-1</sup>). **IR (neat, cm<sup>-1</sup>):** ν = 2954, 1583, 1495, 1468, 1390, 1329, 1262, 1240, 1165, 1127, 1047, 816, 768, 715, 644. **HRMS (ESI+)** calculated for [M+H]<sup>+</sup>: 457.2122 (C<sub>28</sub>H<sub>29</sub>N<sub>2</sub>O<sub>4</sub><sup>+</sup>), Found 457.2120.

### 6-acetyl-1,13-dimethoxy-5,9-dipropyl-5,9-dihydro-13bH-quinolino[2,3,4-kl]acridin-13b-ylium tetrafluoroborate (17a)

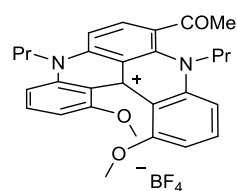

Compound **16** (20 mg, 0.04 mmol, 1 equiv) was dissolved in 3 mL of anhydrous CH<sub>2</sub>Cl<sub>2</sub>. To this solution was added SOCl<sub>2</sub> (3.2 μL, 0.05 mmol, 1.2 equiv) and the reaction was stirred for 10 min at 25 °C. Then the reaction mixture was cooled to -5 °C using an ice/salt bath and methylmagnesium iodide (3 M in Et<sub>2</sub>O, 19 μL, 0.06 mmol, 1.5 equiv) was added and after 30 min of stirring at -5 °C, the mixture was hydrolysed by addition of 1 mL of HBF<sub>4</sub> 1 M in H<sub>2</sub>O. The reaction mixture was extracted with CH<sub>2</sub>Cl<sub>2</sub>, washed with NaBF<sub>4</sub> 0.2 M in H<sub>2</sub>O. The organic phase was dried over Na<sub>2</sub>SO<sub>4</sub>, filtered and finally evaporated. Purification by silicagel column chromatography (CH<sub>2</sub>Cl<sub>2</sub>/MeOH, 97:3) afforded the pure product as a green solid (15 mg, 75%).

$R_f = 0.46$  (SiO<sub>2</sub>, CH<sub>2</sub>Cl<sub>2</sub>/MeOH, 97:3). **M. P.:** 110-112 °C. **<sup>1</sup>H NMR (CD<sub>2</sub>Cl<sub>2</sub>, 500 MHz):**  $\delta = 8.58$  (d,  $J = 9.7$  Hz, 1H, CH), 8.03 (t,  $J = 8.9$  Hz, 1H, CH), 7.92 (t,  $J = 8.2$  Hz, 1H, CH), 7.57 (d,  $J = 9.7$  Hz, 1H, CH), 7.51 (d,  $J = 8.2$  Hz, 1H, CH), 7.48 (d,  $J = 8.9$  Hz, 1H, CH), 7.00 (d,  $J = 8.2$  Hz, 1H, CH), 6.93 (d,  $J = 8.9$  Hz, 1H, CH), 4.92 – 4.85 (m, 1H, CH<sub>2</sub>), 4.78 – 4.70 (m, 1H, CH<sub>2</sub>), 4.59 – 4.51 (m, 1H, CH<sub>2</sub>), 3.80 (s, 3H, OCH<sub>3</sub>), 3.77 (s, 3H, OCH<sub>3</sub>), 3.69 – 3.58 (m, 1H, CH<sub>2</sub>), 2.78 (s, 3H, CH<sub>3</sub>), 2.27 – 2.14 (m, 2H, CH<sub>2</sub>), 1.76 – 1.67 (m, 2H, CH<sub>2</sub>), 1.28 (t,  $J = 7.4$  Hz, 3H, CH<sub>3</sub>), 0.40 (t,  $J = 7.4$  Hz, 3H, CH<sub>3</sub>). **<sup>13</sup>C{<sup>1</sup>H} NMR (CD<sub>2</sub>Cl<sub>2</sub>, 125 MHz):**  $\delta = 196.3$  (C=O), 160.2 (C), 159.6 (C), 142.2 (C), 141.9 (C), 141.2 (C), 140.5 (C), 139.0 (CH), 138.6 (CH), 137.3 (CH), 129.6 (C), 120.6 (C), 120.6 (C), 116.7 (C), 114.1 (C), 110.6 (CH), 108.0 (CH), 105.9 (C), 104.8 (CH), 104.4 (CH), 60.1 (CH<sub>2</sub>), 56.5 (OCH<sub>3</sub>), 56.4 (OCH<sub>3</sub>), 53.1 (CH<sub>2</sub>), 28.8 (CH<sub>3</sub>), 22.7 (CH<sub>2</sub>), 21.0 (CH<sub>2</sub>), 11.4 (CH<sub>3</sub>), 10.8 (CH<sub>3</sub>). **<sup>19</sup>F NMR (CD<sub>2</sub>Cl<sub>2</sub>, 282 MHz):**  $\delta = -150.7$ . **UV-Vis:**  $\lambda_{\max}$  (CH<sub>3</sub>CN) = 593 nm ( $\epsilon = 9080$  L.mol<sup>-1</sup>.cm<sup>-1</sup>). **IR (neat, cm<sup>-1</sup>):**  $\nu = 2928, 2854, 1674, 1580, 1504, 1467, 1405, 1390, 1345, 1268, 1236, 1171, 1123, 1041, 974, 895, 870, 818$ . **HRMS (ESI+)** calculated for [M<sup>+</sup>]: 455.2328 (C<sub>29</sub>H<sub>31</sub>N<sub>2</sub>O<sub>3</sub><sup>+</sup>), Found 455.2329.

**6-benzoyl-1,13-dimethoxy-5,9-dipropyl-5,9-dihydro-13bH-quinolino[2,3,4-kl]acridin-13b-ylum tetrafluoroborate (17b)**

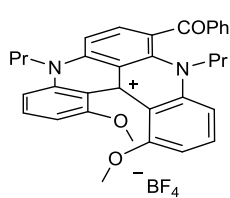

Compound **16** (20 mg, 0.04 mmol, 1 equiv) was dissolved in 3 mL of anhydrous CH<sub>2</sub>Cl<sub>2</sub>. To this solution was added SOCl<sub>2</sub> (3.2  $\mu$ L, 0.05 mmol, 1.2 equiv) and the reaction was stirred for 10 min at 25 °C. Then the reaction mixture was cooled to -5 °C using an ice/salt bath and phenylmagnesium bromide (1.5 M in THF, 32  $\mu$ L, 0.06 mmol, 1.5 equiv) was added and after 30 min of stirring at -5 °C, the mixture was

hydrolysed by addition of 1 mL of HBF<sub>4</sub> 1 M in H<sub>2</sub>O. The reaction mixture was extracted with CH<sub>2</sub>Cl<sub>2</sub>, washed with NaBF<sub>4</sub> 0.2 M in H<sub>2</sub>O. The organic phase was dried over Na<sub>2</sub>SO<sub>4</sub>, filtered and finally evaporated. Purification by silicagel column chromatography (CH<sub>2</sub>Cl<sub>2</sub>/MeOH, 97:3) afforded the pure product as a green solid (15 mg, 67%).

$R_f = 0.35$  (SiO<sub>2</sub>, CH<sub>2</sub>Cl<sub>2</sub>/MeOH, 97:3). **M. P.:** 130-132 °C. **<sup>1</sup>H NMR (CD<sub>2</sub>Cl<sub>2</sub>, 500 MHz):**  $\delta = 8.29$  (d,  $J = 8.8$  Hz, 1H, CH), 8.05 (t,  $J = 8.6$  Hz, 1H, CH), 7.89 – 7.84 (m, 3H, CH), 7.71 (t,  $J = 6.8$  Hz, 1H, CH), 7.57 – 7.51 (m, 4H, CH), 7.18 (d,  $J = 8.8$  Hz, 1H, CH), 7.01 (d,  $J = 8.2$  Hz, 1H, CH), 6.93 (d,  $J = 8.2$  Hz, 1H, CH), 4.79-4.71 (m, 1H, CH<sub>2</sub>), 4.58 – 4.49 (m, 1H, CH<sub>2</sub>), 4.43 – 4.36 (m, 1H, CH<sub>2</sub>), 3.81 (s, 3H, OCH<sub>3</sub>), 3.78 (s, 3H, OCH<sub>3</sub>), 3.78 – 3.72 (m, 1H, CH<sub>2</sub>), 2.28 – 2.16 (m, 2H, CH<sub>2</sub>), 1.77 – 1.69 (m, 1H, CH<sub>2</sub>), 1.28 (t,  $J = 7.4$  Hz, 3H, CH<sub>3</sub>), 0.1 – 0.82 (m, 1H, CH<sub>2</sub>), 0.39 (t,  $J = 7.4$  Hz, 3H, CH<sub>3</sub>). **<sup>13</sup>C{<sup>1</sup>H} NMR (CD<sub>2</sub>Cl<sub>2</sub>, 125 MHz):**  $\delta = 194.1$  (C=O), 160.3 (C), 159.6 (C), 142.1 (C), 142.1 (C), 142.0 (C), 141.6 (C), 140.2 (C), 139.7 (CH), 138.8 (CH), 137.3 (CH), 137.0 (C), 134.5 (CH), 130.5 (2 CH), 129.6 (2 CH), 120.7 (C), 119.4 (C), 116.7 (C), 114.3 (C), 110.2 (CH), 108.0 (CH), 105.7 (CH), 104.8 (CH), 104.5 (CH), 58.9 (NCH<sub>2</sub>), 56.5 (OCH<sub>3</sub>), 56.4 (OCH<sub>3</sub>), 52.9 (NCH<sub>2</sub>), 22.6 (CH<sub>2</sub>), 20.9 (CH<sub>2</sub>), 11.4 (CH<sub>3</sub>), 10.8 (CH<sub>3</sub>). **<sup>19</sup>F NMR (CD<sub>2</sub>Cl<sub>2</sub>, 282 MHz):**  $\delta = -150.6$ . **UV-Vis:**  $\lambda_{\max}$  (CH<sub>3</sub>CN) = 598 nm ( $\epsilon = 9130$  L.mol<sup>-1</sup>.cm<sup>-1</sup>). **IR (neat, cm<sup>-1</sup>):**  $\nu = 2960, 1650, 1587, 1508, 1469,$

1347, 1273, 1172, 1128, 1055, 818. **HRMS (ESI+)** calculated for [M+]: 517.2486 (C<sub>34</sub>H<sub>33</sub>N<sub>2</sub>O<sub>3</sub><sup>+</sup>), Found 517.5201.

**6-(ethoxycarbonyl)-1,13-dimethoxy-5,9-dipropyl-5,9-dihydro-13bH-quinolino[2,3,4-kl]acridin-13b-ylidium tetrafluoroborate (17c)**

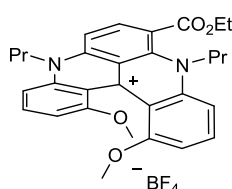

Compound **16** (100 mg, 0.18 mmol, 1 equiv) was dissolved in 2 mL of anhydrous CH<sub>2</sub>Cl<sub>2</sub>. To this solution was added SOCl<sub>2</sub> (40 μL, 0.56 mmol, 6 equiv) and the reaction was stirred for 10 min at 25 °C. Then freshly distilled ethanol (54 μL, 0.92 mmol, 5 equiv) was added and after 10 min of stirring at 25 °C the mixture was concentrated under reduced pressure. The residue was diluted in CH<sub>2</sub>Cl<sub>2</sub> and washed with HBF<sub>4</sub> 1 M in H<sub>2</sub>O, dried over Na<sub>2</sub>SO<sub>4</sub>, filtered and finally evaporated. Purification by silicagel column chromatography (CH<sub>2</sub>Cl<sub>2</sub>/MeOH, 95:5) afforded the pure product as a shiny green solid (103 mg, 98%).

R<sub>f</sub> = 0.65 (SiO<sub>2</sub>, CH<sub>2</sub>Cl<sub>2</sub>/MeOH, 95:5). **M. P.:** 155-157 °C. **<sup>1</sup>H NMR (CD<sub>2</sub>Cl<sub>2</sub>, 500 MHz):** δ = 8.62 (d, *J* = 9.1 Hz, 1H, CH), 8.02 (dd, *J* = 8.9, 8.8 Hz, 1H, CH), 7.90 (t, *J* = 8.3 Hz, 1H, CH), 7.51 (dd, *J* = 10.1, 9.1 Hz, 2H, CH), 7.44 (dd, *J* = 8.8, 0.9 Hz, 1H, CH), 6.99 (d, *J* = 8.1 Hz, 1H, CH), 6.91 (dd, *J* = 8.1, 0.9 Hz, 1H, CH), 4.92 – 4.87 (m, 1H, CH<sub>2</sub>), 4.76 – 4.69 (m, 1H, CH<sub>2</sub>), 4.52 – 4.47 (m, 3H, CH<sub>2</sub>), 3.87 – 3.80 (m, 1H, CH<sub>2</sub>), 3.80 (s, 3H, OCH<sub>3</sub>), 3.76 (s, 3H, OCH<sub>3</sub>), 2.22 – 2.16 (m, 2H, CH<sub>2</sub>), 1.75 – 1.70 (m, 2H, CH<sub>2</sub>), 1.46 (t, *J* = 7.0 Hz, 3H, CH<sub>3</sub>), 1.26 (t, *J* = 7.4 Hz, 3H, CH<sub>3</sub>), 0.40 (t, *J* = 7.4 Hz, 3H, CH<sub>3</sub>). **<sup>13</sup>C{<sup>1</sup>H} NMR (CD<sub>2</sub>Cl<sub>2</sub>, 125 MHz):** δ = 165.8 (C), 160.0 (C), 159.4 (C), 142.1 (C), 141.7 (C), 141.3 (C), 141.2 (C), 140.3 (C), 139.6 (CH), 128.5 (CH), 137.1 (CH), 120.5 (C), 116.4 (C), 112.8 (C), 110.2 (C), 107.8 (CH), 105.9 (CH), 104.6 (CH), 104.2 (CH), 62.4 (CH<sub>2</sub>), 59.2 (CH<sub>2</sub>), 56.23 (OCH<sub>3</sub>), 56.2 (OCH<sub>3</sub>), 52.9 (CH<sub>2</sub>), 22.5 (CH<sub>2</sub>), 20.8 (CH<sub>2</sub>), 14.6 (CH<sub>3</sub>), 11.2 (CH<sub>3</sub>), 10.6 (CH<sub>3</sub>). **<sup>19</sup>F NMR (CD<sub>2</sub>Cl<sub>2</sub>, 282 MHz):** δ = -152.6. **UV-Vis:** λ<sub>max</sub> (CH<sub>3</sub>CN) = 592 nm (ε = 12200 L·mol<sup>-1</sup>·cm<sup>-1</sup>). **IR (neat, cm<sup>-1</sup>):** ν = 3627, 3112, 2957, 1707, 1584, 1504, 1466, 1338, 1269, 1238, 1170, 1124, 1035, 816, 763, 718. **HRMS (ESI+)** calculated for [M+]: 485.2435 (C<sub>30</sub>H<sub>33</sub>N<sub>2</sub>O<sub>4</sub><sup>+</sup>), Found 485.2437.

**1,13-dimethoxy-6-(phenoxycarbonyl)-5,9-dipropyl-5,9-dihydro-13bH-quinolino[2,3,4-kl]acridin-13b-ylidium tetrafluoroborate (17d)**

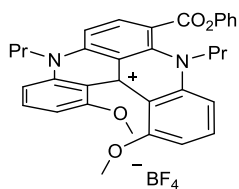

Compound **16** (50 mg, 0.09 mmol, 1 equiv) was dissolved in 1 mL of anhydrous CH<sub>2</sub>Cl<sub>2</sub>. To this solution was added SOCl<sub>2</sub> (20 μL, 0.28 mmol, 3 equiv) and the reaction was stirred for 10 min at 25 °C. Then phenol (129 mg, 1.38 mmol, 15 equiv) was added and after 2 h of stirring at 25 °C the mixture was quenched with water. The organic layer was extracted and washed with a 0.2 M aqueous diluted solution

of NaBF<sub>4</sub>, dried over Na<sub>2</sub>SO<sub>4</sub>, filtered and finally evaporated. Purification by silicagel column chromatography (CH<sub>2</sub>Cl<sub>2</sub>/MeOH, 95:5) afforded the pure product as a green solid (50 mg, 88%).

**R<sub>f</sub>** = 0.4 (SiO<sub>2</sub>, CH<sub>2</sub>Cl<sub>2</sub>/MeOH, 95:5). **M. P.:** 128-140 °C. **<sup>1</sup>H NMR (CD<sub>2</sub>Cl<sub>2</sub>, 500 MHz):** δ = 8.88 (d, *J* = 9.1 Hz, 1H, CH), 8.07 (t, *J* = 8.9 Hz, 1H, CH), 7.91 (t, *J* = 8.5 Hz, 1H, CH), 7.62 (d, *J* = 9.0 Hz, 1H, CH), 7.56 (d, *J* = 9.0 Hz, 1H, CH), 7.53 – 7.49 (m, 2H, CH), 7.44 (dd, *J* = 8.7, 0.8 Hz, 1H, CH), 7.39 – 7.34 (m, 1H, CH), 7.34 – 7.29 (m, 2H, CH), 7.04 (d, *J* = 8.1 Hz, 1H, CH), 6.94 (dd, *J* = 8.4, 0.8 Hz, 1H, CH), 5.02 – 4.97 (m, 1H, CH<sub>2</sub>), 4.84 – 4.74 (m, 1H, CH<sub>2</sub>), 4.63 – 4.56 (m, 1H, CH<sub>2</sub>), 4.01 – 3.95 (m, 1H, CH<sub>2</sub>), 3.83 (s, 3H, OCH<sub>3</sub>), 3.78 (s, 3H, OCH<sub>3</sub>), 2.32 – 2.18 (m, 2H, CH<sub>2</sub>), 1.81 – 1.77 (m, 2H, CH<sub>2</sub>), 1.30 (t, *J* = 7.4 Hz, 3H, CH<sub>3</sub>), 0.46 (t, *J* = 7.4 Hz, 3H, CH<sub>3</sub>). **<sup>13</sup>C{<sup>1</sup>H} NMR (CD<sub>2</sub>Cl<sub>2</sub>, 125 MHz):** δ = 164.1 (C), 160.1 (C), 159.4 (C), 151.1 (C), 142.1 (C), 142.0 (C), 141.7 (C), 141.2 (C), 140.9 (C), 140.0 (CH), 138.7 (CH), 137.3 (CH), 130.1 (CH), 126.8 (CH), 122.0 (CH), 120.5 (C), 116.5 (C), 114.1 (C), 111.1 (C), 110.4 (CH), 107.9 (CH), 106.3 (CH), 104.9 (CH), 104.4 (CH), 59.7 (CH<sub>2</sub>), 56.4 (OCH<sub>3</sub>), 56.2 (OCH<sub>3</sub>), 53.0 (CH<sub>2</sub>), 22.6 (CH<sub>2</sub>), 20.9 (CH<sub>2</sub>), 11.3 (CH<sub>3</sub>), 10.7 (CH<sub>3</sub>). **<sup>19</sup>F NMR (CD<sub>2</sub>Cl<sub>2</sub>, 282 MHz):** δ = -152.5. **UV-Vis:** λ<sub>max</sub> (CH<sub>3</sub>CN) = 586 nm (ε = 11700 L.mol<sup>-1</sup>.cm<sup>-1</sup>). **IR (neat, cm<sup>-1</sup>):** ν = 3631, 3550, 1724, 1583, 1504, 1469, 1410, 1390, 1336, 1269, 1235, 1188, 1165, 1119, 1036, 816, 786, 755, 691. **HRMS (ESI+)** calculated for [M<sup>+</sup>]: 533.2435 (C<sub>34</sub>H<sub>33</sub>N<sub>2</sub>O<sub>4</sub><sup>+</sup>), Found 533.2436.

### 6-((ethylthio)carbonyl)-1,13-dimethoxy-5,9-dipropyl-5,9-dihydro-13bH-quinolino[2,3,4-kl]acridin-13b-ylum tetrafluoroborate(17e)

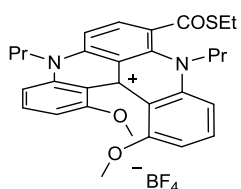

Compound **16** (100 mg, 0.18 mmol, 1 equiv) was dissolved in 1 mL of anhydrous CH<sub>2</sub>Cl<sub>2</sub>. To this solution was added SOCl<sub>2</sub> (20 μL, 0.28 mmol, 3 equiv) and the reaction was stirred for 10 min at 25 °C. Then ethanethiol (102 μL, 1.38 mmol, 15 equiv) was added and after 10 min of stirring at 25 °C the mixture was concentrated under reduced pressure. The residue was diluted in CH<sub>2</sub>Cl<sub>2</sub> and washed with HBF<sub>4</sub>

1 M in H<sub>2</sub>O, dried over Na<sub>2</sub>SO<sub>4</sub>, filtered and finally evaporated. Purification by silicagel column chromatography (CH<sub>2</sub>Cl<sub>2</sub>/MeOH, 95:5) afforded the pure product as a green solid (41 mg, 76%).

**R<sub>f</sub>** = 0.39 (SiO<sub>2</sub>, CH<sub>2</sub>Cl<sub>2</sub>/MeOH, 95:5). **M. P.:** 158-160 °C. **<sup>1</sup>H NMR (CD<sub>2</sub>Cl<sub>2</sub>, 500 MHz):** δ = 8.56 (d, *J* = 9.1 Hz, 1H, CH), 8.02 (t, *J* = 8.9 Hz, 1H, CH), 7.90 (t, *J* = 8.5 Hz, 1H, CH), 7.50 (dd, *J* = 9.2, 8.8 Hz, 2H, CH), 7.40 (d, *J* = 8.6 Hz, 1H, CH), 6.99 (d, *J* = 8.0 Hz, 1H, CH), 6.91 (d, *J* = 8.0 Hz, 1H, CH), 4.81 – 4.69 (m, 2H, CH<sub>2</sub>), 4.54 – 4.51 (m, 1H, CH<sub>2</sub>), 3.83 – 3.78 (m, 1H, CH<sub>2</sub>), 3.79 (s, 3H, OCH<sub>3</sub>), 3.75 (s, 3H, OCH<sub>3</sub>), 3.22 – 3.15 (m, 2H, CH<sub>2</sub>), 2.22 – 2.15 (m, 2H, CH<sub>2</sub>), 1.76 – 1.71 (m, 2H, CH<sub>2</sub>), 1.43 (t, *J* = 7.4 Hz, 3H, CH<sub>3</sub>), 1.26 (t, *J* = 7.3 Hz, 3H, CH<sub>3</sub>), 0.44 (t, *J* = 7.3 Hz, 3H, CH<sub>3</sub>). **<sup>13</sup>C{<sup>1</sup>H} NMR (CD<sub>2</sub>Cl<sub>2</sub>, 125 MHz):** δ = 191.7 (C), 160.0 (C), 159.4 (C), 142.3 (C), 141.8 (C), 141.5 (C), 140.2 (C), 139.3 (C), 138.6 (CH), 138.0 (CH), 137.2 (CH), 120.5 (C), 120.2 (C), 116.5 (C), 114.0 (C), 110.1 (CH), 107.8 (CH), 105.6 (CH), 104.6 (CH), 104.3 (CH), 58.6 (CH<sub>2</sub>), 56.3 (CH<sub>3</sub>), 56.2 (CH<sub>3</sub>), 52.8 (CH<sub>2</sub>), 24.8 (CH<sub>2</sub>), 22.6 (CH<sub>2</sub>), 20.8 (CH<sub>2</sub>), 15.0 (CH<sub>3</sub>), 11.2

(CH<sub>3</sub>), 10.6 (CH<sub>3</sub>). **<sup>19</sup>F NMR (CD<sub>2</sub>Cl<sub>2</sub>, 282 MHz):** δ = -152.6. **UV-Vis:** λ<sub>max</sub> (CH<sub>3</sub>CN) = 596 nm (ε = 11100 L.mol<sup>-1</sup>.cm<sup>-1</sup>). **IR (neat, cm<sup>-1</sup>):** ν = 2954, 2876, 1650, 1582, 1504, 1468, 1389, 1342, 1265, 1219, 1171, 1039, 975, 880, 817, 782, 752, 721, 698, 670, 622. **HRMS (ESI+)** calculated for [M<sup>+</sup>]: 501.2207 (C<sub>30</sub>H<sub>33</sub>N<sub>2</sub>O<sub>3</sub>S<sup>+</sup>), Found 501.2217.

**1,13-dimethoxy-5,9-dipropyl-6-(propylcarbamoyl)-5,9-dihydro-13bH-quinolino[2,3,4-kl]acridin-13b-ylidium tetrafluoroborate (17f)**

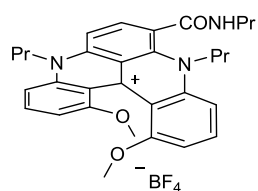

Compound **16** (50 mg, 0.09 mmol, 1 equiv) was dissolved in 2 mL of anhydrous CH<sub>2</sub>Cl<sub>2</sub>. To this solution was added SOCl<sub>2</sub> (20 μL, 0.28 mmol, 3 equiv) and the reaction was stirred for 10 min at 25 °C. Then propylamine (113 μL, 1.38 mmol, 15 equiv) was added at 0 °C and after 15 min of stirring at 25 °C the mixture was quenched with water. The organic layer was extracted and washed with HBF<sub>4</sub> 1 M in H<sub>2</sub>O, dried over Na<sub>2</sub>SO<sub>4</sub>, filtered and finally evaporated. Purification by silica column chromatography (CH<sub>2</sub>Cl<sub>2</sub>/MeOH, 95:5) afforded the pure product as a green solid (51 mg, 94%).

R<sub>f</sub> = 0.57 (SiO<sub>2</sub>, CH<sub>2</sub>Cl<sub>2</sub>/MeOH, 95:5). **M. P.:** 138-140 °C. **<sup>1</sup>H NMR (CD<sub>2</sub>Cl<sub>2</sub>, 500 MHz):** δ = 8.26 (d, *J* = 8.8 Hz, 1H, CH), 7.94 (t, *J* = 8.9 Hz, 1H, CH), 7.84 (t, *J* = 8.6 Hz, 1H, CH), 7.44 (d, *J* = 8.9 Hz, 1H, CH), 7.41 (d, *J* = 8.9 Hz, 1H, CH), 7.37 (dd, *J* = 8.9, 0.8 Hz, 1H, CH), 7.19 (t, *J* = 5.7 Hz, 1H, NH), 6.90 (d, *J* = 8.0 Hz, 1H, CH), 6.84 (dd, *J* = 8.2, 0.8 Hz, 1H, CH), 4.77 – 4.72 (m, 1H, CH<sub>2</sub>), 4.65 – 4.60 (m, 1H, CH<sub>2</sub>), 4.42 – 4.36 (m, 1H, CH<sub>2</sub>), 4.13 – 4.07 (m, 1H, CH<sub>2</sub>), 3.76 (s, 3H, OCH<sub>3</sub>), 3.74 (s, 3H, OCH<sub>3</sub>), 2.22 – 2.09 (m, 2H, CH<sub>2</sub>), 1.78 – 1.66 (m, 2H, CH<sub>2</sub>), 1.22 (t, *J* = 7.4 Hz, 3H, CH<sub>3</sub>), 1.03 (t, *J* = 7.3 Hz, 3H, CH<sub>3</sub>), 0.50 (t, *J* = 7.3 Hz, 3H, CH<sub>3</sub>). **<sup>13</sup>C{<sup>1</sup>H} NMR (CD<sub>2</sub>Cl<sub>2</sub>, 125 MHz):** δ = 167.6 (C), 160.0 (C), 159.3 (C), 142.7 (C), 139.2 (C), 138.9 (C), 137.9 (CH), 137.5 (CH), 136.7 (CH), 120.9 (C), 118.6 (C), 116.4 (C), 113.9 (C), 110.1 (CH), 107.7 (CH), 105.4 (CH), 103.9 (CH), 103.7 (CH), 56.6 (CH<sub>2</sub>), 56.2 (OCH<sub>3</sub>), 56.1 (OCH<sub>3</sub>), 52.6 (CH<sub>2</sub>), 42.4 (CH<sub>2</sub>), 23.1 (CH<sub>2</sub>), 22.5 (CH<sub>2</sub>), 20.5 (CH<sub>2</sub>), 11.7 (CH<sub>3</sub>), 11.3 (CH<sub>3</sub>), 10.7 (CH<sub>3</sub>). **<sup>19</sup>F NMR (CD<sub>2</sub>Cl<sub>2</sub>, 282 MHz):** δ = -152.0. **UV-Vis:** λ<sub>max</sub> (CH<sub>3</sub>CN) = 609 nm (ε = 11500 L.mol<sup>-1</sup>.cm<sup>-1</sup>). **IR (neat, cm<sup>-1</sup>):** ν = 3367, 2943, 1643, 1587, 1500, 1468, 1388, 1284, 1261, 1243, 1170, 1127, 1170, 1127, 1036, 815, 756, 646. **HRMS (ESI+)** calculated for [M<sup>+</sup>]: 498.2751 (C<sub>31</sub>H<sub>36</sub>N<sub>3</sub>O<sub>3</sub><sup>+</sup>), Found 498.2752.

**6-(diethylcarbamoyl)-1,13-dimethoxy-5,9-dipropyl-5,9-dihydro-13bH-quinolino[2,3,4-kl]acridin-13b-ylidium tetrafluoroborate (17g)**

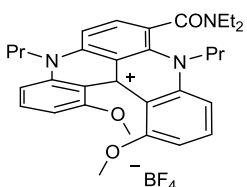

Compound **16** (50 mg, 0.09 mmol, 1 equiv) was dissolved in 2 mL of anhydrous CH<sub>2</sub>Cl<sub>2</sub>. To this solution was added SOCl<sub>2</sub> (20 μL, 0.28 mmol, 3 equiv) and the reaction was stirred for 10 min at 25 °C. Then diethylamine (143 μL, 1.38 mmol, 15 equiv) was added at 0 °C and after 15 min of stirring at 25 °C the mixture was

quenched with water. The organic layer was extracted and washed with HBF<sub>4</sub> 1 M in H<sub>2</sub>O, dried over Na<sub>2</sub>SO<sub>4</sub>, filtered and finally evaporated. Purification by silica column chromatography (CH<sub>2</sub>Cl<sub>2</sub>/MeOH, 95:5) afforded the pure product as a green solid (54 mg, 98%).

**R<sub>f</sub>** = 0.35 (SiO<sub>2</sub>, CH<sub>2</sub>Cl<sub>2</sub>/MeOH, 95:5). **M. P.:** 134-136 °C. **<sup>1</sup>H NMR (DMSO-d<sub>6</sub>, 368 K, 400 MHz):** δ = 8.10 – 8.00 (m, 2H, CH), 7.92 (dd, *J* = 8.0, 1.8 Hz, 1H, CH), 7.82 (d, *J* = 8.9 Hz, 1H, CH), 7.72 (d, *J* = 8.9 Hz, 1H, CH), 7.63 (d, *J* = 8.6 Hz, 1H, CH), 7.11 (d, *J* = 8.9 Hz, 1H, CH), 7.03 (d, *J* = 8.2 Hz, 1H, CH), 4.88 – 4.73 (m, 2H, CH<sub>2</sub>), 4.72 – 4.60 (m, 1H, CH<sub>2</sub>), 4.18 – 4.15 (m, 1H, CH<sub>2</sub>), 3.77 (s, 3H, OCH<sub>3</sub>), 3.73 (s, 3H, OCH<sub>3</sub>), 3.62 (m, 2H, CH<sub>2</sub>), 3.70 – 3.58 (m, 2H, CH<sub>2</sub>), 3.40 – 3.14 (m, 2H, CH<sub>2</sub>), 2.14 – 1.99 (m, 2H, CH<sub>2</sub>), 1.77 – 1.57 (m, 2H, CH<sub>2</sub>), 1.37 – 1.24 (m, 6H, CH<sub>3</sub>), 1.17 (t, *J* = 7.3 Hz, CH<sub>3</sub>), 0.57 (t, *J* = 7.3 Hz, 3H, CH<sub>3</sub>). **<sup>13</sup>C{<sup>1</sup>H} NMR (DMSO-d<sub>6</sub>, 343 K, 125 MHz):** δ = 167.7 (C), 158.8 (C), 158.2 (C), 141.8 (C), 141.2 (C), 141.0 (C), 137.6 (C), 137.4 (CH), 136.4 (CH), 135.7 (C), 119.9 (C), 114.7 (C), 112.7 (C), 109.2 (CH), 107.8 (CH), 107.7 (CH), 105.8 (C), 103.7 (CH), 103.4 (CH), 103.3 (CH), 55.8 (OCH<sub>3</sub>), 55.5 (OCH<sub>3</sub>), 54.5 (CH<sub>2</sub>), 53.6 (CH<sub>2</sub>), 50.8 (CH<sub>2</sub>), 50.6 (CH<sub>2</sub>), 21.3 (CH<sub>2</sub>), 19.6 (CH<sub>2</sub>), 11.9 (CH<sub>3</sub>), 10.4 (2 CH<sub>3</sub>), 10.1 (CH<sub>3</sub>). **<sup>19</sup>F NMR (CD<sub>2</sub>Cl<sub>2</sub>, 282 MHz):** δ = -152.6. **UV-Vis:** λ<sub>max</sub> (CH<sub>3</sub>CN) = 615 nm (ε = 10300 L.mol<sup>-1</sup>.cm<sup>-1</sup>). **IR (neat, cm<sup>-1</sup>):** ν = 3619, 2943, 1587, 1501, 1464, 1430, 1385, 1346, 1319, 1281, 1262, 1170, 1122, 1037, 860, 815, 783, 757, 730, 643. **HRMS (ESI+)** calculated for [M<sup>+</sup>]: 512.2908 (C<sub>32</sub>H<sub>38</sub>N<sub>3</sub>O<sub>3</sub><sup>+</sup>), Found 512.2902.



### 3. $^1\text{H}$ , $^{13}\text{C}$ , $^{19}\text{F}$ NMR and HRMS analysis

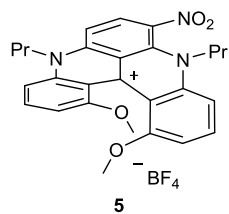

#### $^1\text{H}$ NMR (400 MHz, $\text{CD}_2\text{Cl}_2$ )

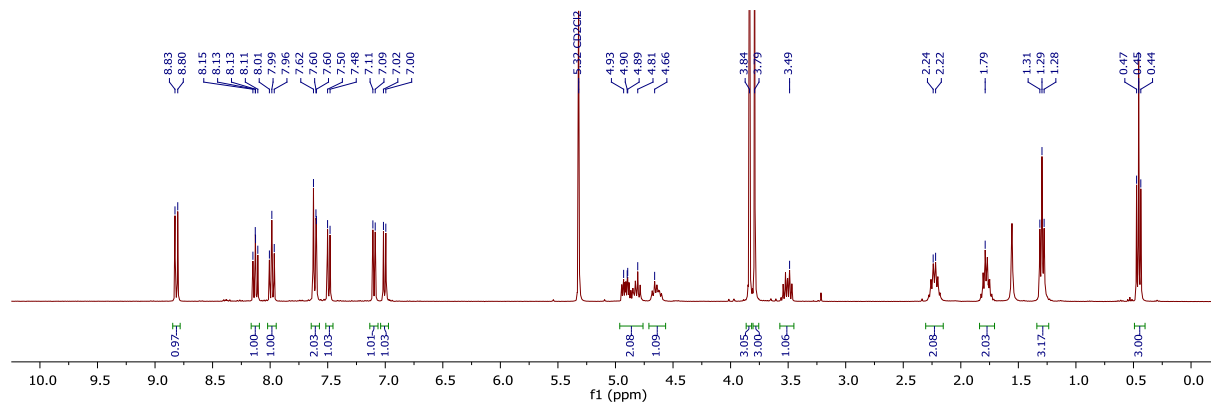

#### $^{13}\text{C}$ NMR (101 MHz, $\text{CD}_2\text{Cl}_2$ )

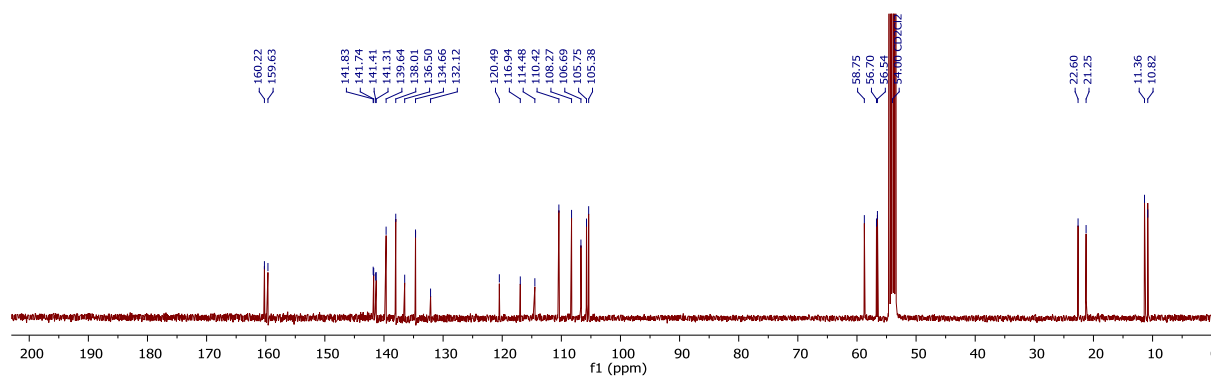

#### $^{19}\text{F}$ NMR (282 MHz, $\text{CD}_2\text{Cl}_2$ )

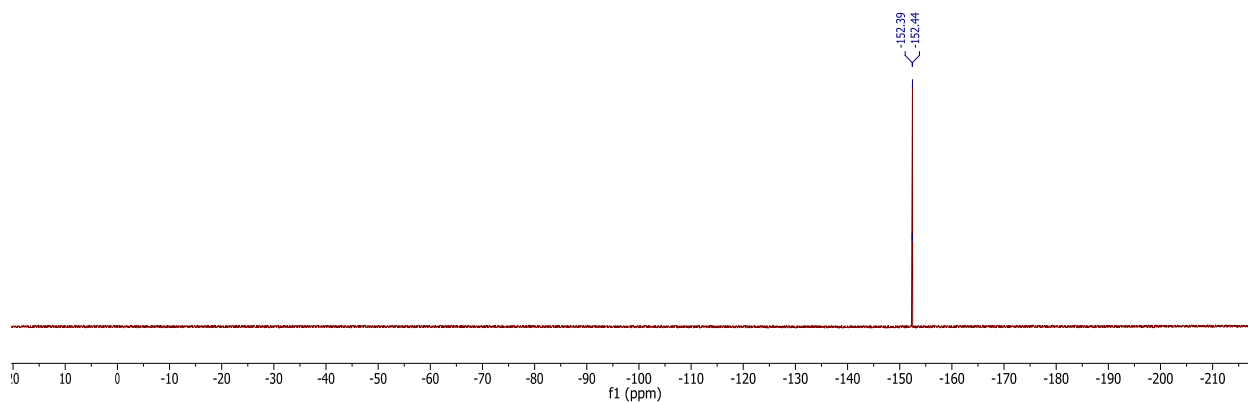

# UNIVERSITY OF GENEVA

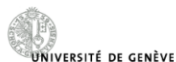

Faculty of Sciences

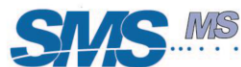

Sciences Mass Spectrometry

|                         |                     |                      |                         |
|-------------------------|---------------------|----------------------|-------------------------|
| Submitter:              | HERNANDEZ-DELGADO   | Date of reception:   | 03/12/15                |
| Sample name:            | IH294               | Date of certificate: | 10/12/15                |
| Sample number:          | 8163                | Data filename:       | MS03GE-151209-ES-A001   |
| Operator:               | Eliane Sandmeier    | Instrument:          | QSTAR XL (AB/MDS Sciex) |
| Principal investigator: | Dr. Sophie Michalet | Ionisation mode:     | ESI (positive mode)     |

| Expected Formula     | Observed $m/z$ [ $M$ ] <sup>+</sup> | Expected $m/z$ (amu) | Accuracy (ppm) |
|----------------------|-------------------------------------|----------------------|----------------|
| $C_{27}H_{28}N_3O_4$ | 458.2097                            | 458.2074             | 4.9            |

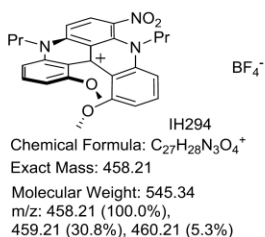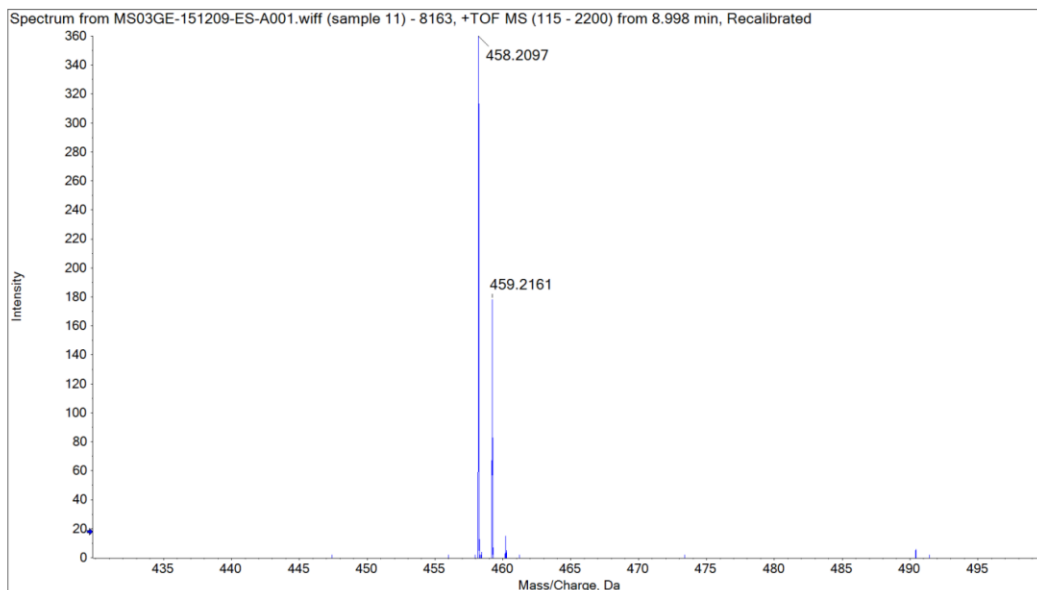

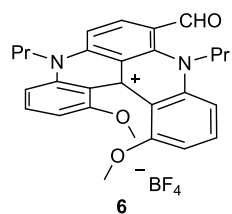

**<sup>1</sup>H NMR (400 MHz, CD<sub>2</sub>Cl<sub>2</sub>)**

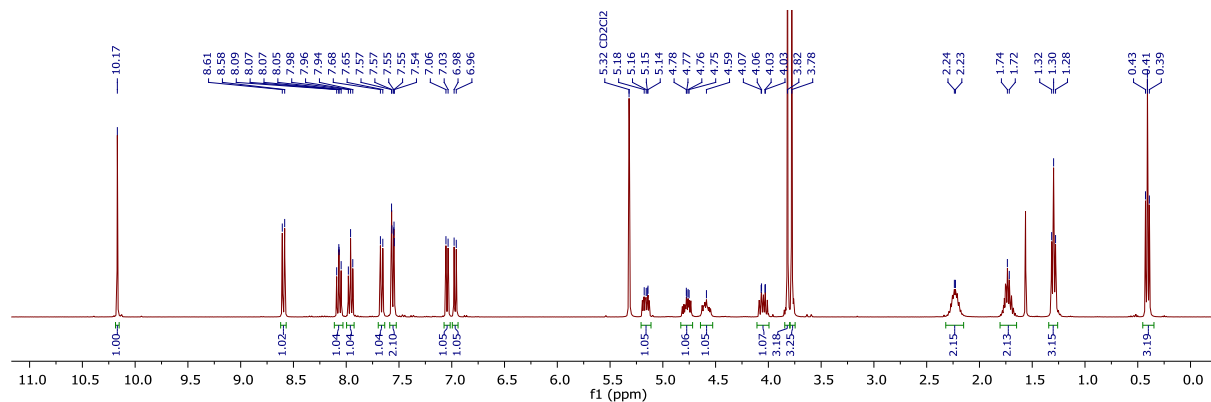

**<sup>13</sup>C NMR (101 MHz, CD<sub>2</sub>Cl<sub>2</sub>)**

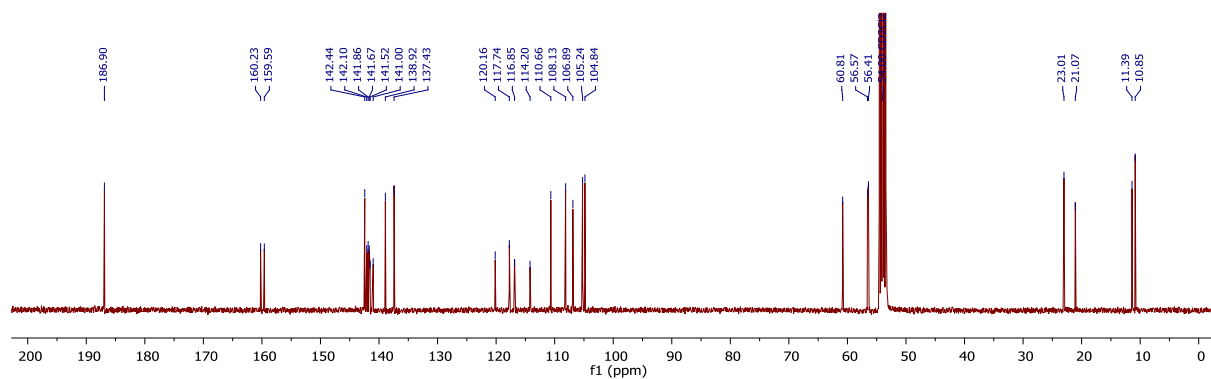

**<sup>19</sup>F NMR (282 MHz, CD<sub>2</sub>Cl<sub>2</sub>)**

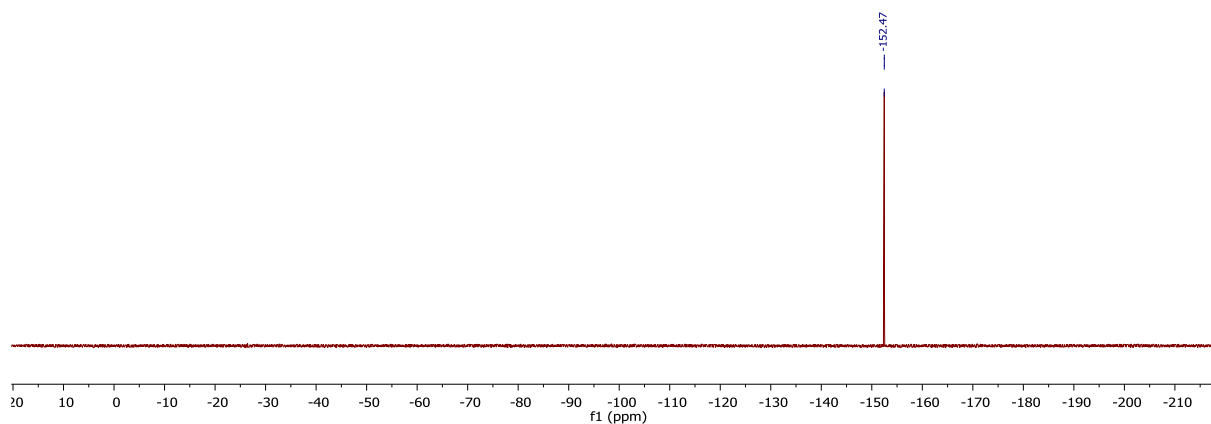

# UNIVERSITY OF GENEVA

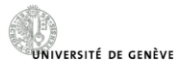

Faculty of Sciences

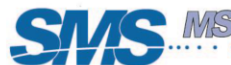

Sciences Mass Spectrometry

|                         |                     |                      |                         |
|-------------------------|---------------------|----------------------|-------------------------|
| Submitter:              | HERNANDEZ-DELGADO   | Date of reception:   | 03/12/15                |
| Sample name:            | IH453               | Date of certificate: | 10/12/15                |
| Sample number:          | 8165                | Data filename:       | MS03GE-151209-ES-A001   |
| Operator:               | Eliane Sandmeier    | Instrument:          | QSTAR XL (AB/MDS Sciex) |
| Principal investigator: | Dr. Sophie Michalet | Ionisation mode:     | ESI (positive mode)     |

| Expected Formula                                              | Observed $m/z$ [ $M$ ] <sup>+</sup> | Expected $m/z$ (amu) | Accuracy (ppm) |
|---------------------------------------------------------------|-------------------------------------|----------------------|----------------|
| C <sub>28</sub> H <sub>29</sub> N <sub>2</sub> O <sub>3</sub> | 441.2192                            | 441.2173             | 4.3            |

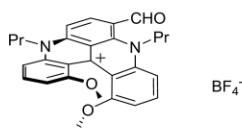

Chemical Formula: C<sub>28</sub>H<sub>29</sub>N<sub>2</sub>O<sub>3</sub><sup>+</sup>  
 IH453 Exact Mass: 441.22  
 Molecular Weight: 528.35  
 m/z: 441.22 (100.0%), 442.22 (30.7%),  
 443.22 (5.3%)

Spectrum from MS03GE-151209-ES-A001.wiff (sample 13) - 8165, +TOF MS (115 - 2200) from 6.914 to 6.964 min, Gaussian smoothed, Recalibrated

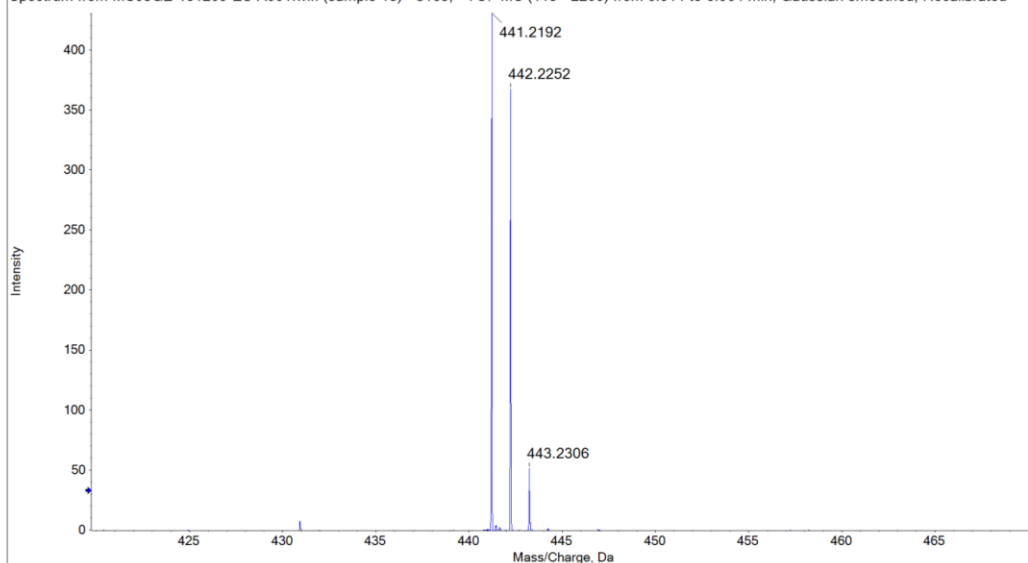

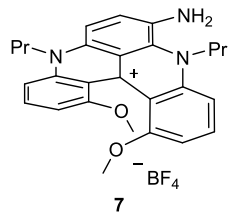

<sup>1</sup>H NMR (400 MHz, CD<sub>2</sub>Cl<sub>2</sub>)

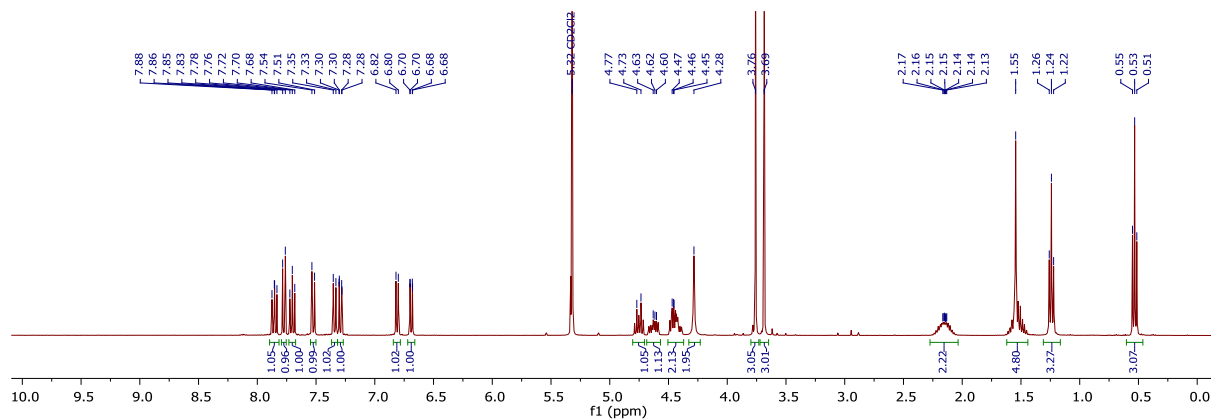

<sup>13</sup>C NMR (101 MHz, CD<sub>2</sub>Cl<sub>2</sub>)

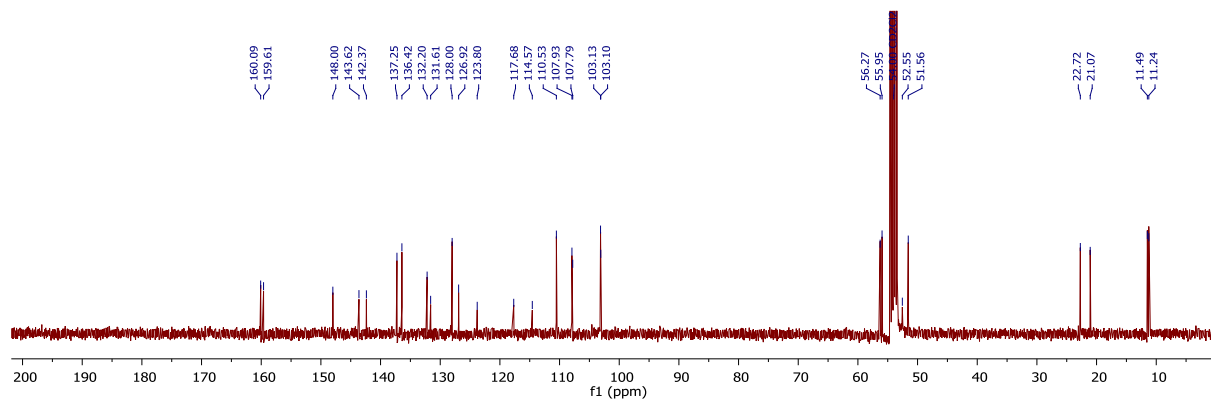

<sup>19</sup>F NMR (282 MHz, CD<sub>2</sub>Cl<sub>2</sub>)

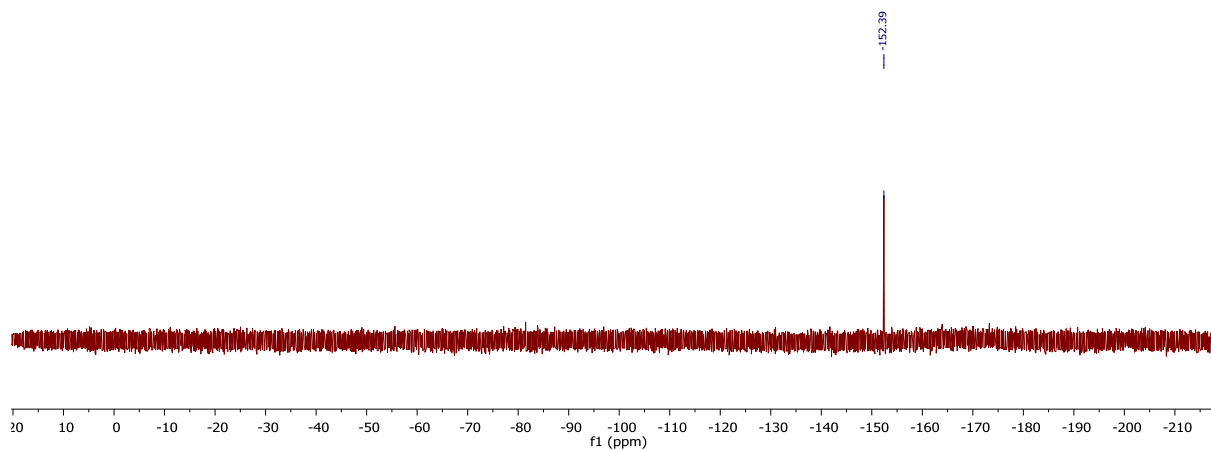

# UNIVERSITY OF GENEVA

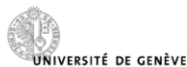

Faculty of Sciences

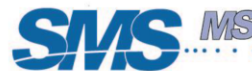

Sciences Mass Spectrometry

|                         |                     |                      |                         |
|-------------------------|---------------------|----------------------|-------------------------|
| Submitter:              | HERNANDEZ DELGADO   | Date of reception:   | 03/12/15                |
| Sample name:            | IH212               | Date of certificate: | 09/12/15                |
| Sample number:          | 8160                | Data filename:       | MS03GE-151208-HT-A001   |
| Operator:               | Harry Théraulaz     | Instrument:          | QSTAR XL (AB/MDS Sciex) |
| Principal investigator: | Dr. Sophie Michalet | Ionisation mode:     | ESI (positive mode)     |

| Expected Formula     | Observed $m/z$ [ $M$ ] <sup>+</sup> | Expected $m/z$ (amu) | Accuracy (ppm) |
|----------------------|-------------------------------------|----------------------|----------------|
| $C_{27}H_{30}N_3O_2$ | 428.2325                            | 428.2333             | -1.8           |

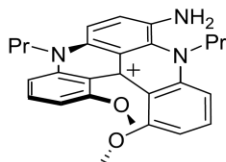

Spectrum from MS03GE-151208-HT-A001.wiff (sample 11) - 8160, +TOF MS (100 - 2200) from 7.397 to 7.447 min, Recalibrated

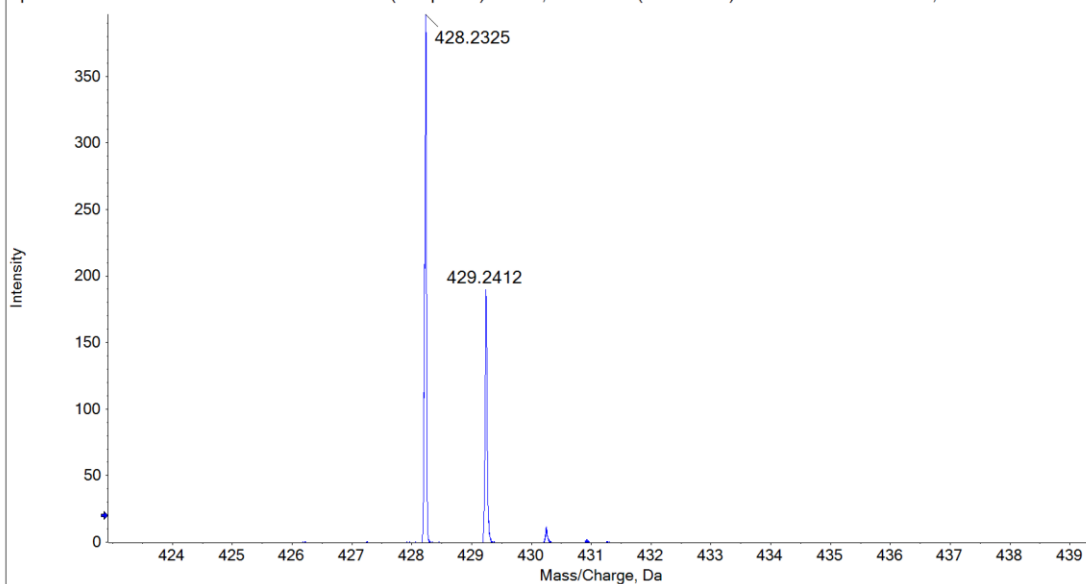

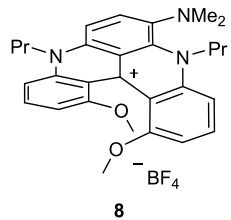

**<sup>1</sup>H NMR (400 MHz, CD<sub>2</sub>Cl<sub>2</sub>)**

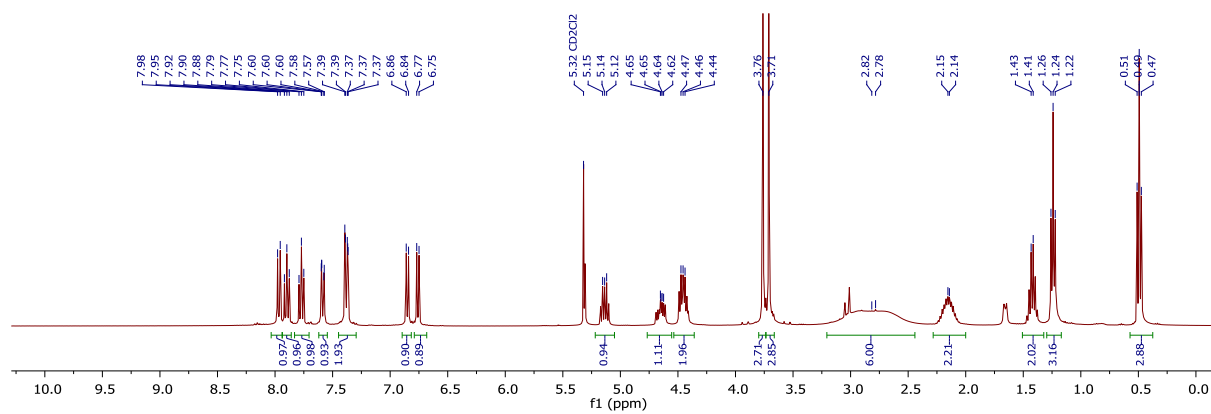

**<sup>13</sup>C NMR (101 MHz, CD<sub>2</sub>Cl<sub>2</sub>)**

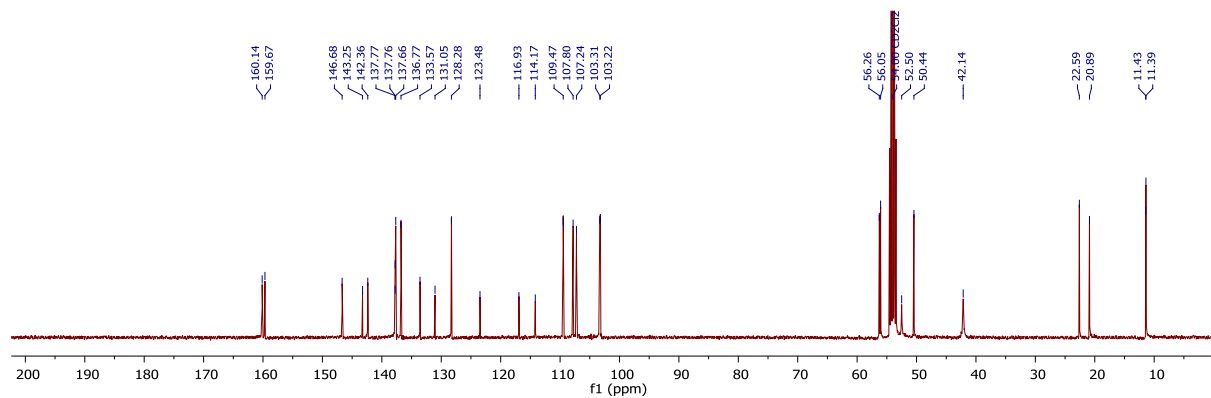

**<sup>19</sup>F NMR (282 MHz, CD<sub>2</sub>Cl<sub>2</sub>)**

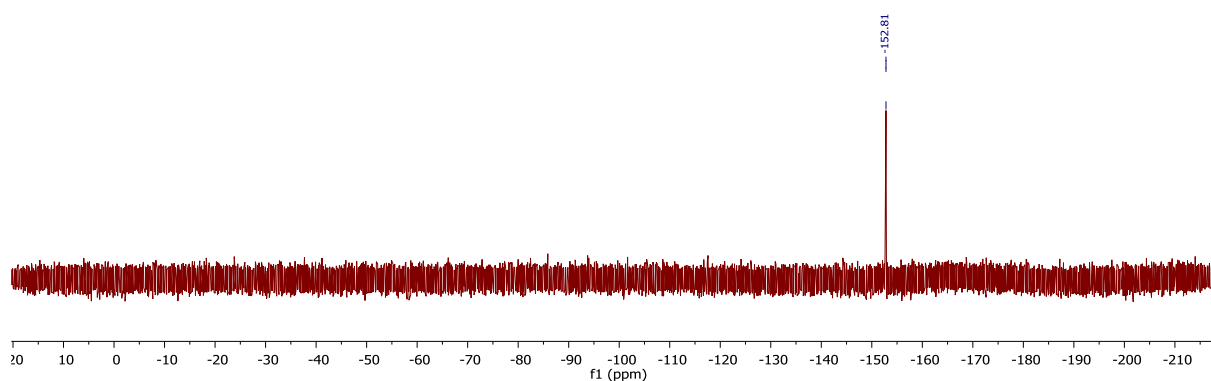

# UNIVERSITY OF GENEVA

Faculty of Sciences

Sciences Mass Spectrometry

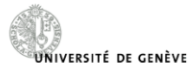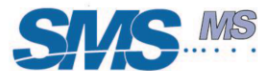

|                         |                     |                      |                         |
|-------------------------|---------------------|----------------------|-------------------------|
| Submitter:              | HERNANDEZ DELGADO   | Date of reception:   | 03/12/15                |
| Sample name:            | IH192               | Date of certificate: | 09/12/15                |
| Sample number:          | 8155                | Data filename:       | MS03GE-151208-HT-A001   |
| Operator:               | Harry Théraulaz     | Instrument:          | QSTAR XL (AB/MDS Sciex) |
| Principal investigator: | Dr. Sophie Michalet | Ionisation mode:     | ESI (positive mode)     |

| Expected Formula     | Observed $m/z$ [ $M$ ] <sup>+</sup> | Expected $m/z$ (amu) | Accuracy (ppm) |
|----------------------|-------------------------------------|----------------------|----------------|
| $C_{29}H_{34}N_3O_2$ | 456.2645                            | 456.2645             | -0.2           |

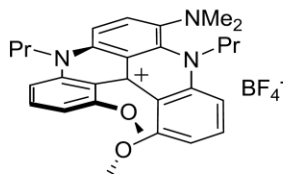

Spectrum from MS03GE-151208-HT-A001.wiff (sample 6) - 8155, +TOF MS (100 - 2200) from 8.264 to 8.297 min, Recalibrated

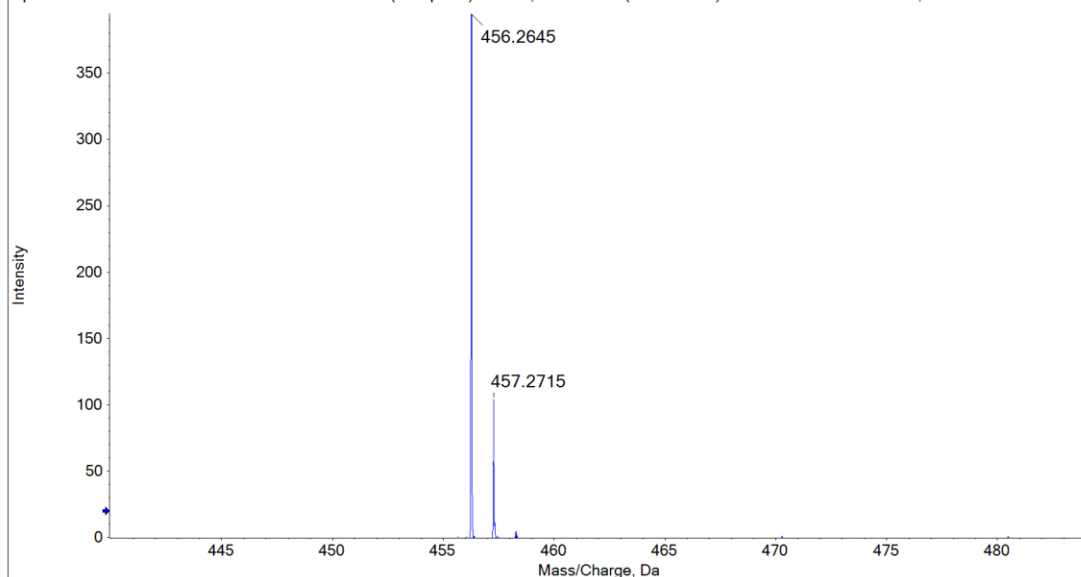



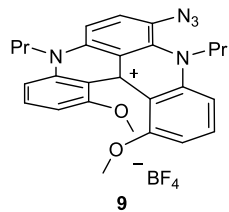

**<sup>1</sup>H NMR (400 MHz, CD<sub>2</sub>Cl<sub>2</sub>)**

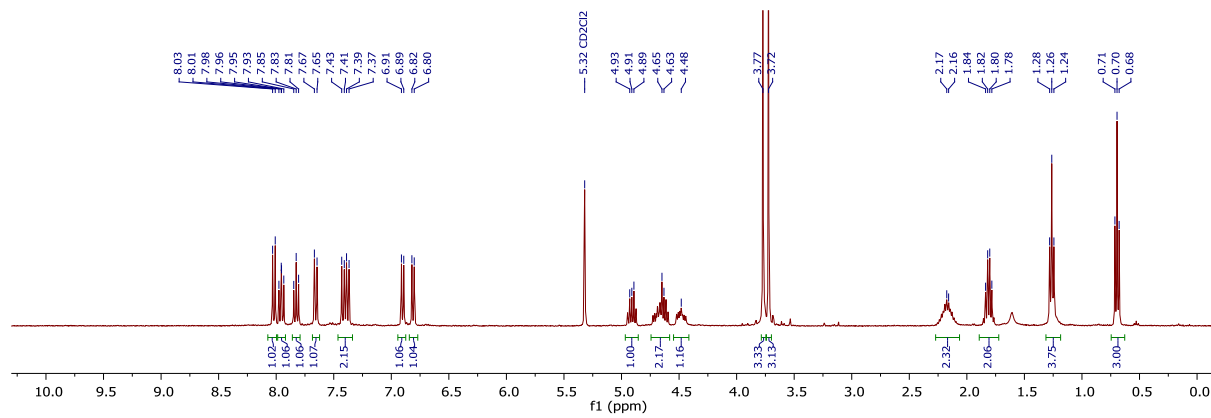

**<sup>13</sup>C NMR (101 MHz, CD<sub>2</sub>Cl<sub>2</sub>)**

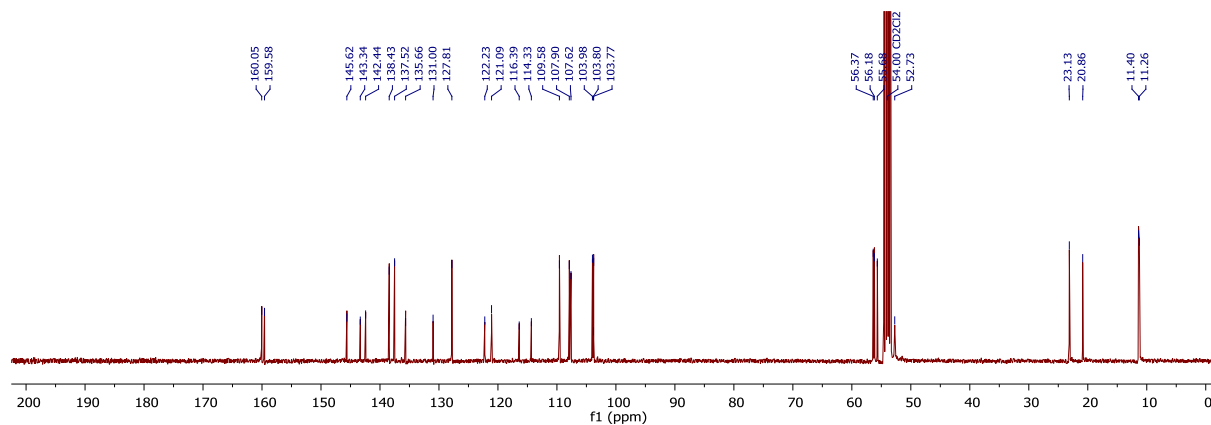

**<sup>19</sup>F NMR (282 MHz, CD<sub>2</sub>Cl<sub>2</sub>)**

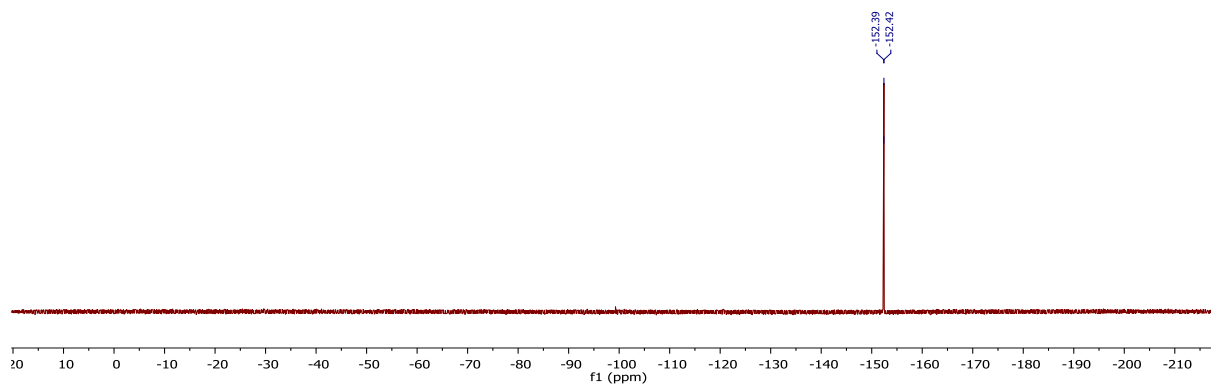

# UNIVERSITY OF GENEVA

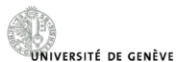

Faculty of Sciences

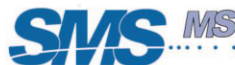

Sciences Mass Spectrometry

|                         |                     |                      |                         |
|-------------------------|---------------------|----------------------|-------------------------|
| Submitter:              | HERNANDEZ-DELGADO   | Date of reception:   | 03/12/15                |
| Sample name:            | IH278               | Date of certificate: | 10/12/15                |
| Sample number:          | 8169                | Data filename:       | MS03GE-151209-ES-A001   |
| Operator:               | Eliane Sandmeier    | Instrument:          | QSTAR XL (AB/MDS Sciex) |
| Principal investigator: | Dr. Sophie Michalet | Ionisation mode:     | ESI (positive mode)     |

| Expected Formula     | Observed $m/z$ $[M-N_2]^+$ | Expected $m/z$ (amu) | Accuracy (ppm) |
|----------------------|----------------------------|----------------------|----------------|
| $C_{27}H_{28}N_3O_2$ | 426.2188                   | 426.2176             | 2.9            |

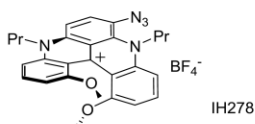

Chemical Formula:  $C_{27}H_{28}N_3O_2^+$   
 Exact Mass: 454.22  
 Molecular Weight: 541.36  
 $m/z$ : 454.22 (100.0%), 455.23 (29.6%),  
 456.23 (4.6%), 455.22 (1.8%)

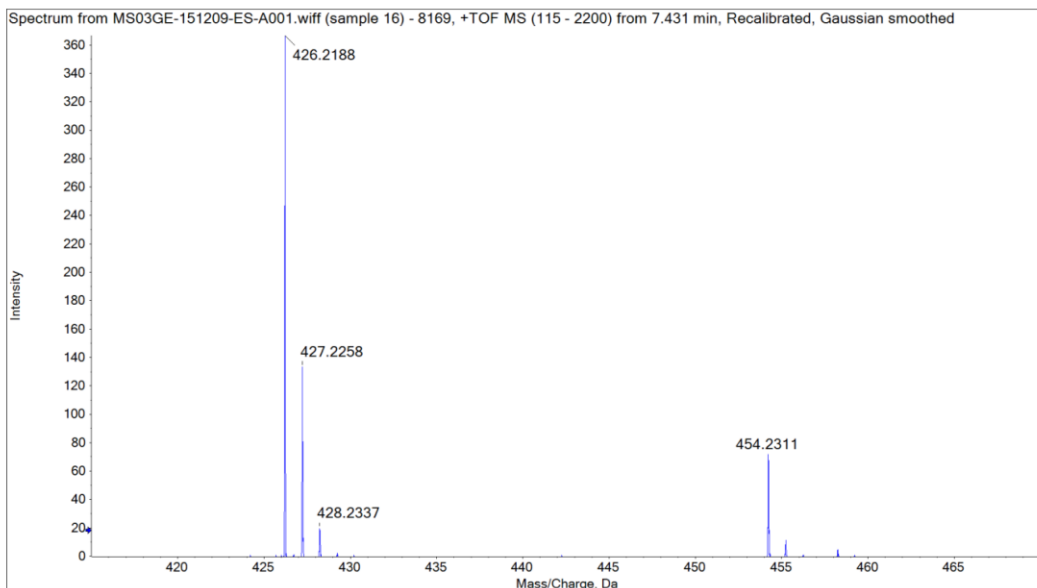

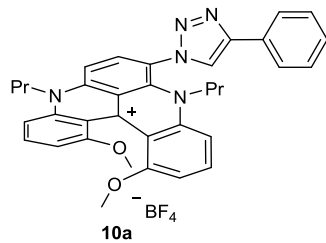

**<sup>1</sup>H NMR (400 MHz, CD<sub>2</sub>Cl<sub>2</sub>)**

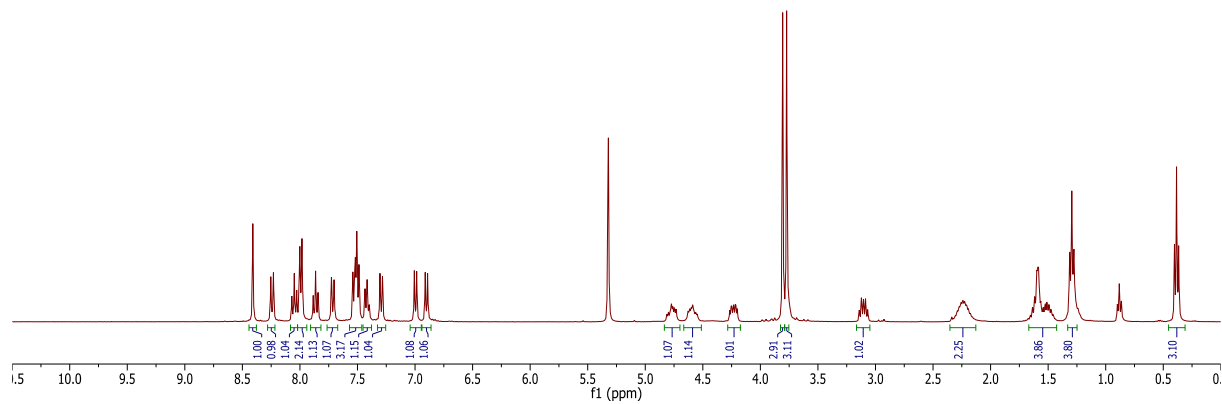

**<sup>13</sup>C NMR (101 MHz, CD<sub>2</sub>Cl<sub>2</sub>)**

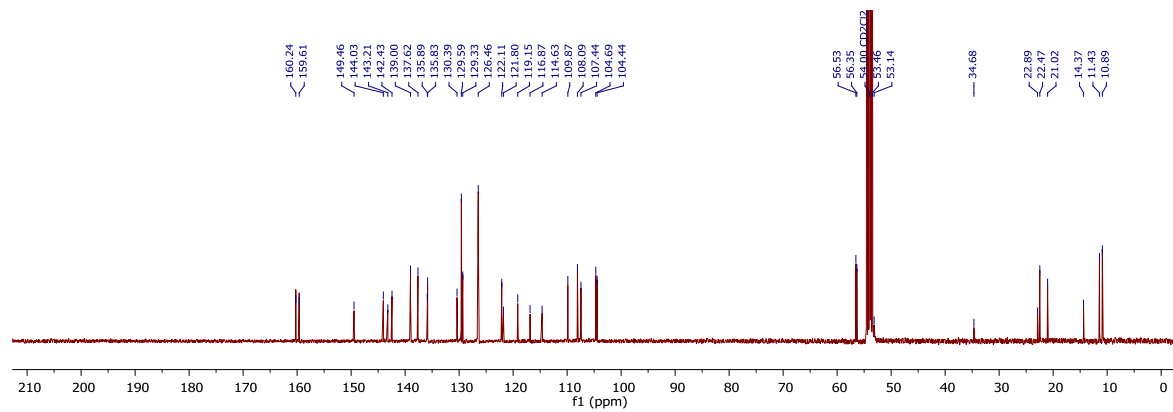

**<sup>19</sup>F NMR (282 MHz, CD<sub>2</sub>Cl<sub>2</sub>)**

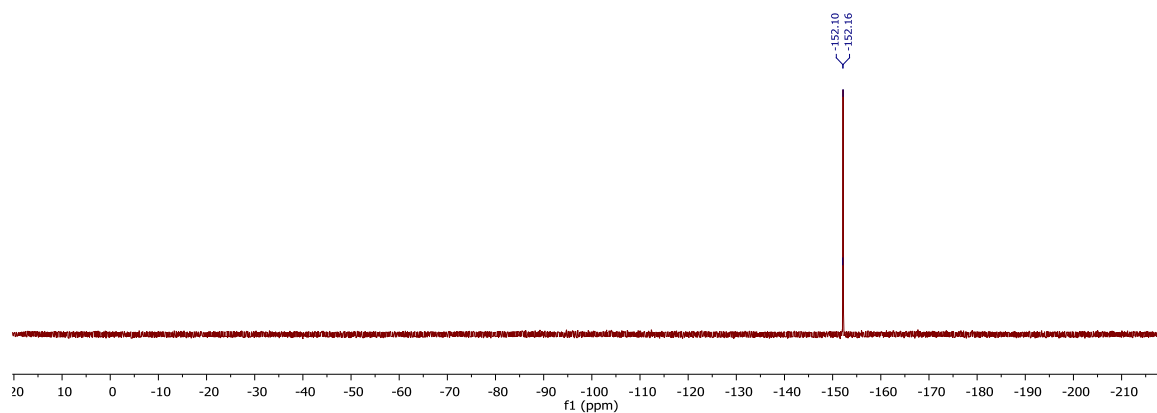

# UNIVERSITY OF GENEVA

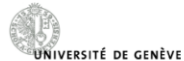

Faculty of Sciences

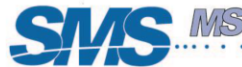

Sciences Mass Spectrometry

|                         |                     |                      |                         |
|-------------------------|---------------------|----------------------|-------------------------|
| Submitter:              | HERNANDEZ DELGADO   | Date of reception:   | 09/12/15                |
| Sample name:            | IH275               | Date of certificate: | 17/12/15                |
| Sample number:          | 8193                | Data filename:       | MS03GE-151216-HT-A001   |
| Operator:               | Harry Théraulaz     | Instrument:          | QSTAR XL (AB/MDS Sciex) |
| Principal investigator: | Dr. Sophie Michalet | Ionisation mode:     | ESI (positive mode)     |

| Expected Formula                                              | Observed $m/z$ [M] <sup>+</sup> | Expected $m/z$ (amu) | Accuracy (ppm) |
|---------------------------------------------------------------|---------------------------------|----------------------|----------------|
| C <sub>35</sub> H <sub>34</sub> N <sub>5</sub> O <sub>2</sub> | 556.2681                        | 556.2707             | -4.6           |

Chemical structure of the compound: Cc1ccc2c(c1)c3c(c2)nc4c3c5c6ccccc6n4n5 (simplified representation of the complex structure shown in the image).

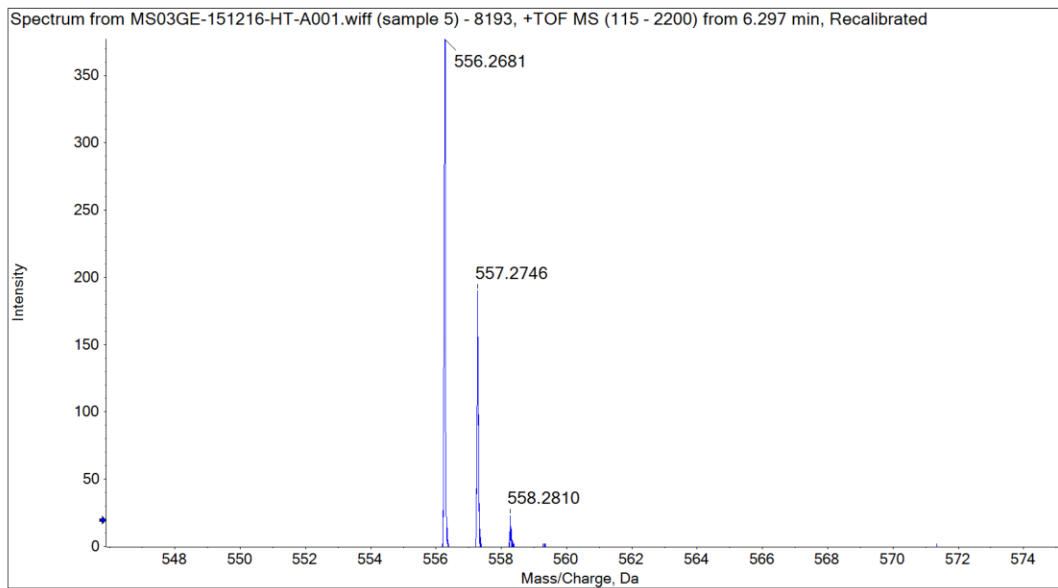

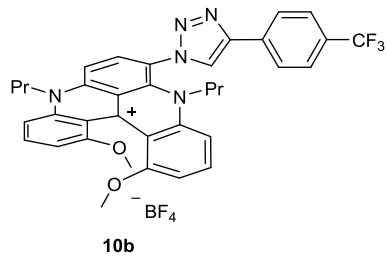

**<sup>1</sup>H NMR (400 MHz, CD<sub>2</sub>Cl<sub>2</sub>)**

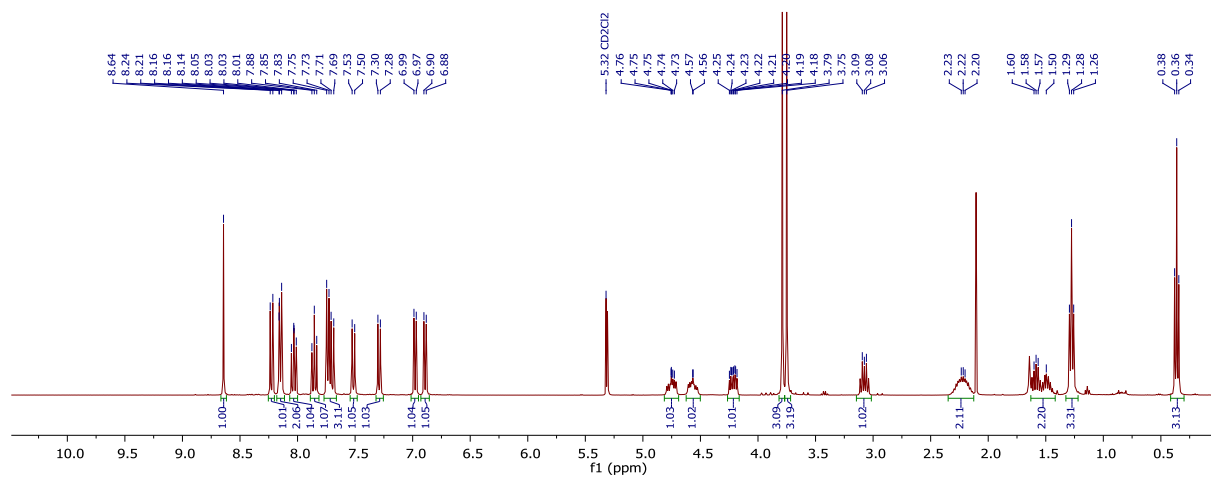

**<sup>13</sup>C NMR (101 MHz, CD<sub>2</sub>Cl<sub>2</sub>)**

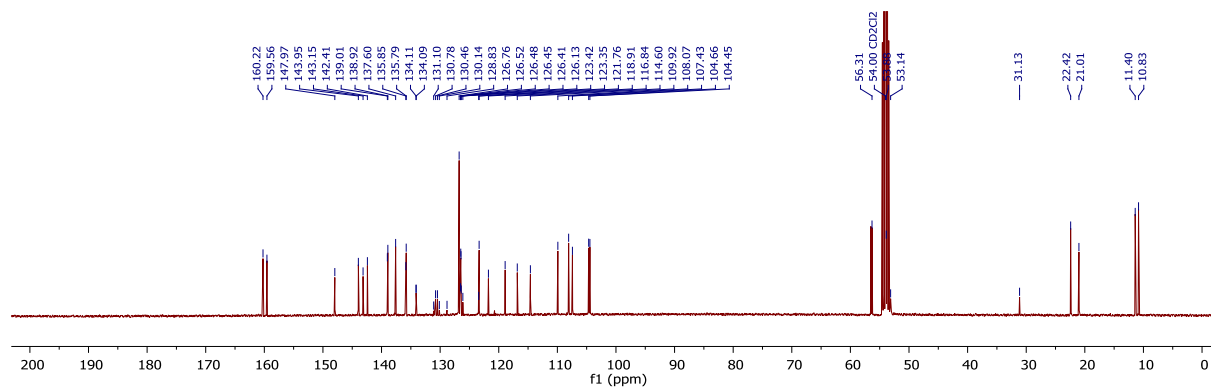

**<sup>19</sup>F NMR (282 MHz, CD<sub>2</sub>Cl<sub>2</sub>)**

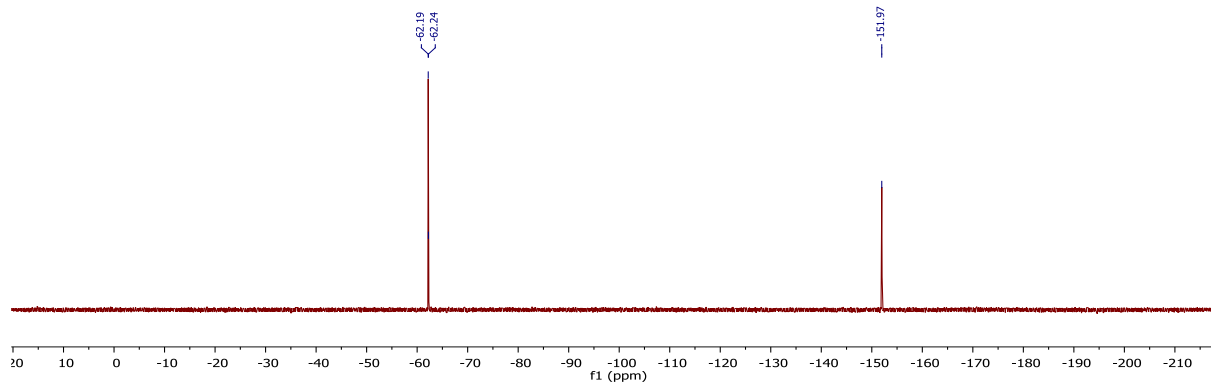

# UNIVERSITY OF GENEVA

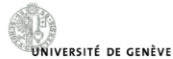

Faculty of Sciences

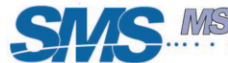

Sciences Mass Spectrometry

|                                             |                                      |
|---------------------------------------------|--------------------------------------|
| Submitter: HERNANDEZ-DELGADO                | Date of reception: 03/12/15          |
| Sample name: IH280                          | Date of certificate: 10/12/15        |
| Sample number: 8161                         | Data filename: MS03GE-151209-ES-A001 |
| Operator: Eliane Sandmeier                  | Instrument: QSTAR XL (AB/MDS Sciex)  |
| Principal investigator: Dr. Sophie Michalet | Ionisation mode: ESI (positive mode) |

| Expected Formula                                                             | Observed $m/z$ [M] <sup>+</sup> | Expected $m/z$ (amu) | Accuracy (ppm) |
|------------------------------------------------------------------------------|---------------------------------|----------------------|----------------|
| C <sub>36</sub> H <sub>33</sub> F <sub>3</sub> N <sub>5</sub> O <sub>2</sub> | 624.2573                        | 624.2581             | -1.2           |

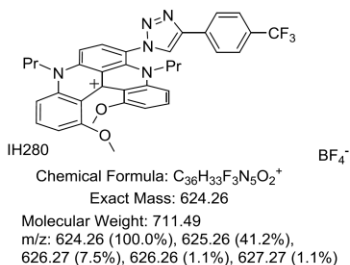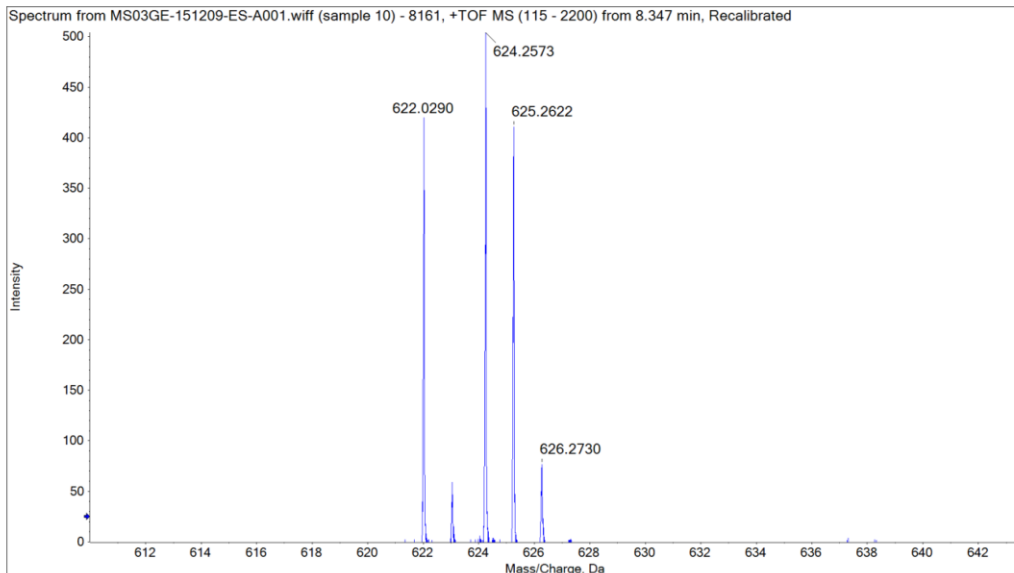

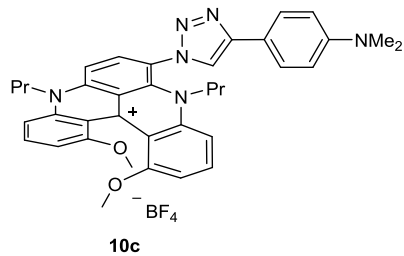

**<sup>1</sup>H NMR (400 MHz, CD<sub>2</sub>Cl<sub>2</sub>)**

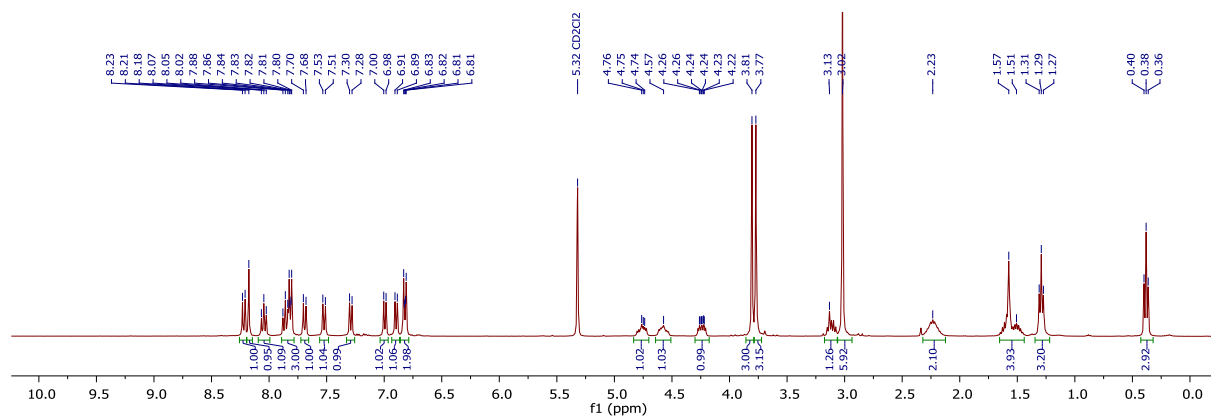

**<sup>13</sup>C NMR (101 MHz, CD<sub>2</sub>Cl<sub>2</sub>)**

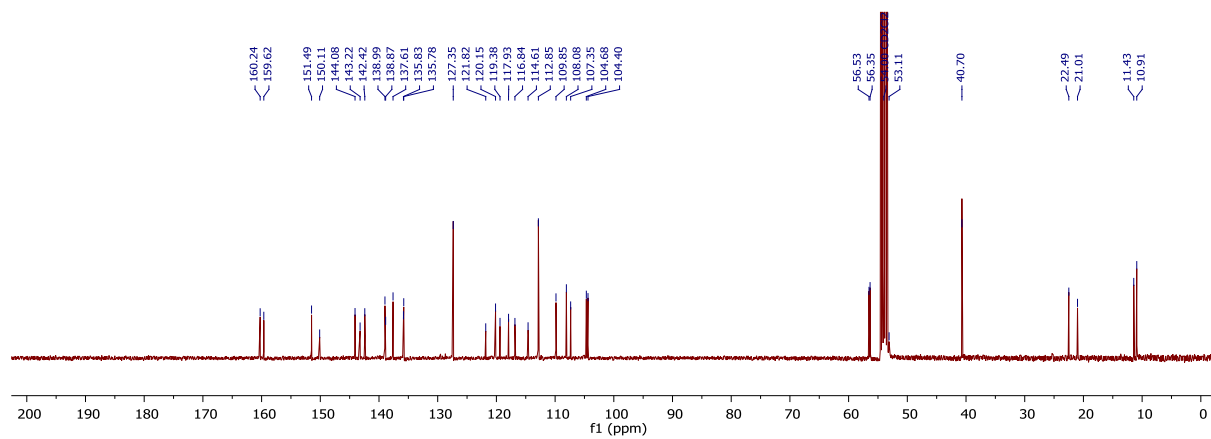

**<sup>19</sup>F NMR (282 MHz, CD<sub>2</sub>Cl<sub>2</sub>)**

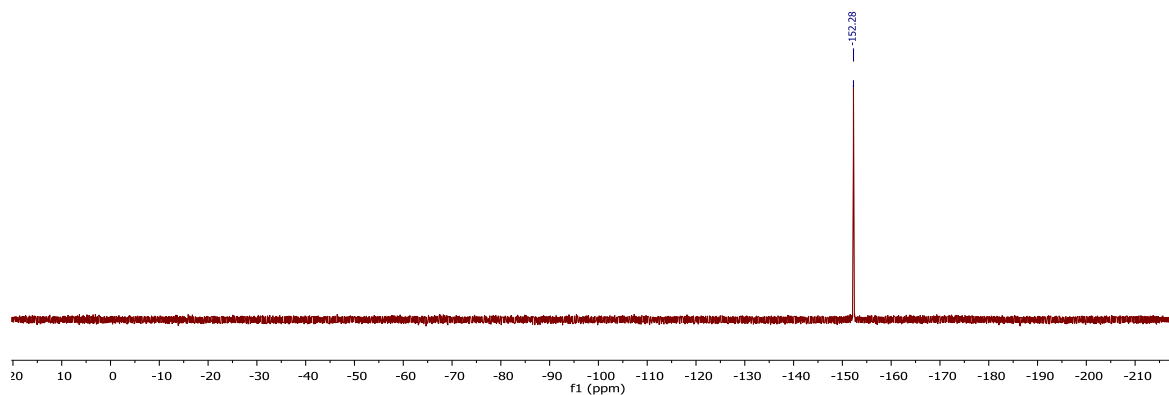

# UNIVERSITY OF GENEVA

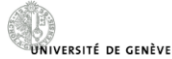

Faculty of Sciences

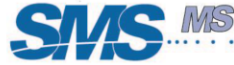

Sciences Mass Spectrometry

|                         |                     |                      |                         |
|-------------------------|---------------------|----------------------|-------------------------|
| Submitter:              | HERNANDEZ-DELGADO   | Date of reception:   | 03/12/15                |
| Sample name:            | IH281               | Date of certificate: | 10/12/15                |
| Sample number:          | 8162                | Data filename:       | MS03GE-151209-ES-A001   |
| Operator:               | Eliane Sandmeier    | Instrument:          | QSTAR XL (AB/MDS Sciex) |
| Principal investigator: | Dr. Sophie Michalet | Ionisation mode:     | ESI (positive mode)     |

| Expected Formula                                              | Observed $m/z$ [M] <sup>+</sup> | Expected $m/z$ (amu) | Accuracy (ppm) |
|---------------------------------------------------------------|---------------------------------|----------------------|----------------|
| C <sub>37</sub> H <sub>39</sub> N <sub>6</sub> O <sub>2</sub> | 599.3155                        | 599.3129             | 4.4            |

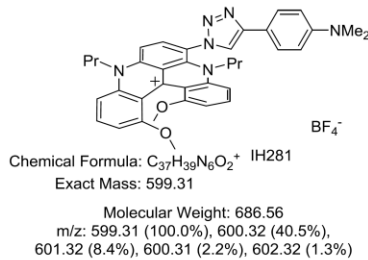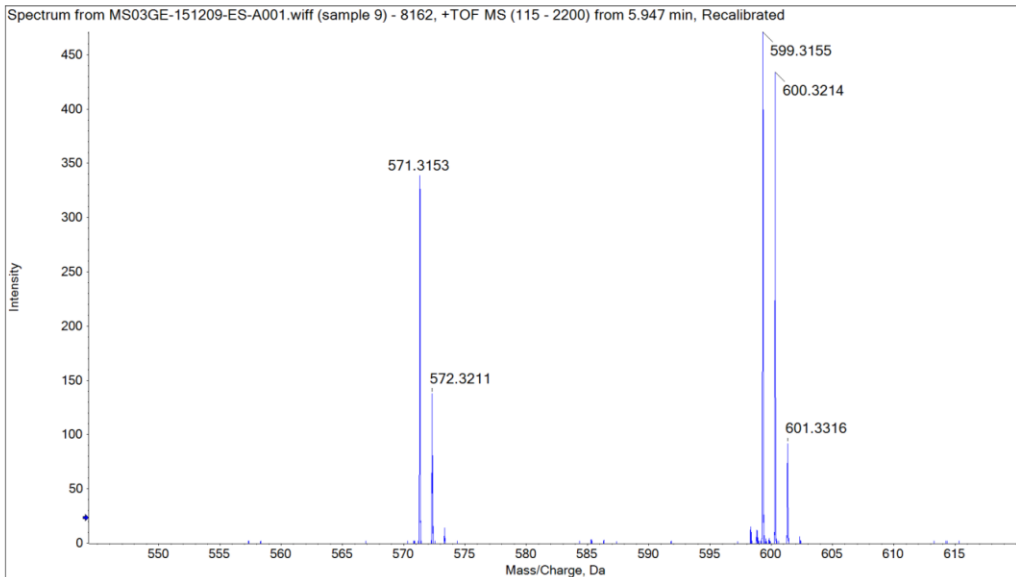



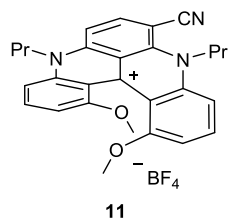

**<sup>1</sup>H NMR (400 MHz, CD<sub>2</sub>Cl<sub>2</sub>)**

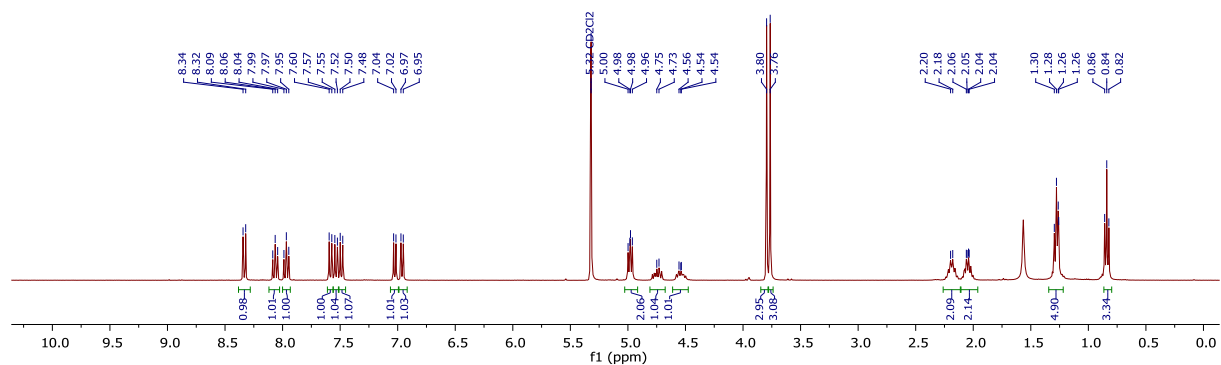

**<sup>13</sup>C NMR (101 MHz, CD<sub>2</sub>Cl<sub>2</sub>)**

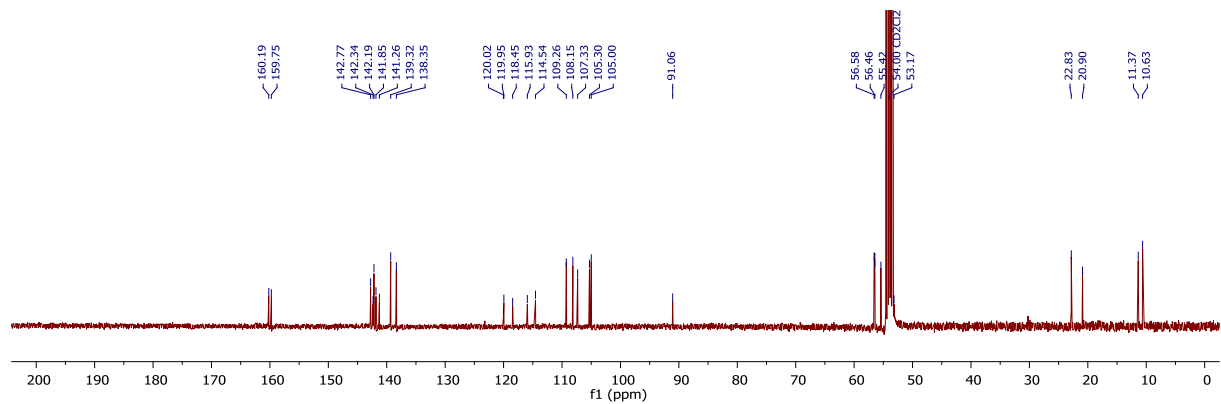

**<sup>19</sup>F NMR (282 MHz, CD<sub>2</sub>Cl<sub>2</sub>)**

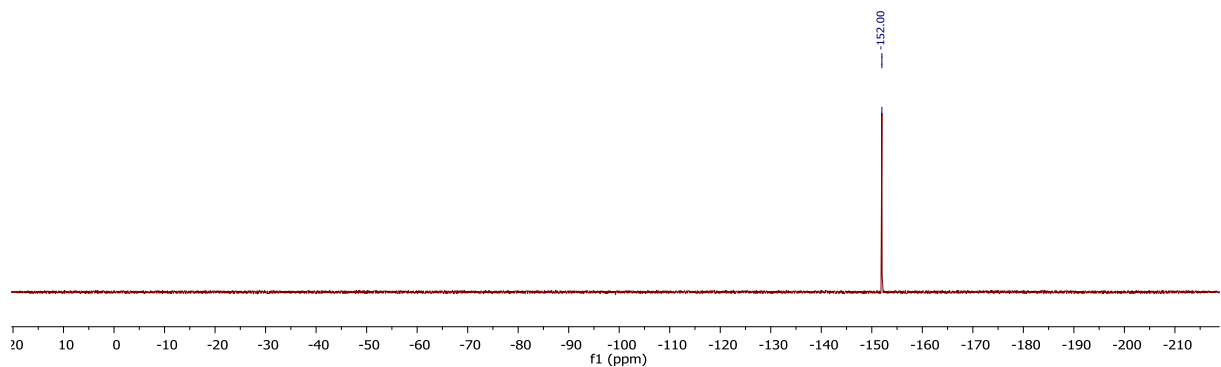

# UNIVERSITY OF GENEVA

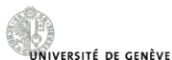

Faculty of Sciences

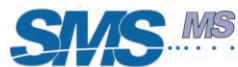

Sciences Mass Spectrometry

|                         |                     |                      |                         |
|-------------------------|---------------------|----------------------|-------------------------|
| Submitter:              | HERNANDEZ-DELGADO   | Date of reception:   | 03/12/15                |
| Sample name:            | IH464               | Date of certificate: | 10/12/15                |
| Sample number:          | 8166                | Data filename:       | MS03GE-151209-ES-A001   |
| Operator:               | Eliane Sandmeier    | Instrument:          | QSTAR XL (AB/MDS Sciex) |
| Principal investigator: | Dr. Sophie Michalet | Ionisation mode:     | ESI (positive mode)     |

| Expected Formula                                              | Observed $m/z$ [M] <sup>+</sup> | Expected $m/z$ (amu) | Accuracy (ppm) |
|---------------------------------------------------------------|---------------------------------|----------------------|----------------|
| C <sub>28</sub> H <sub>28</sub> N <sub>3</sub> O <sub>2</sub> | 438.2170                        | 438.2176             | -1.3           |

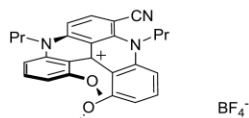

Chemical Formula: C<sub>28</sub>H<sub>28</sub>N<sub>3</sub>O<sub>2</sub><sup>+</sup>  
 Exact Mass: 438.22

IH464  
 Molecular Weight: 525.35  
 $m/z$ : 438.22 (100.0%), 439.22 (31.8%),  
 440.22 (5.2%)

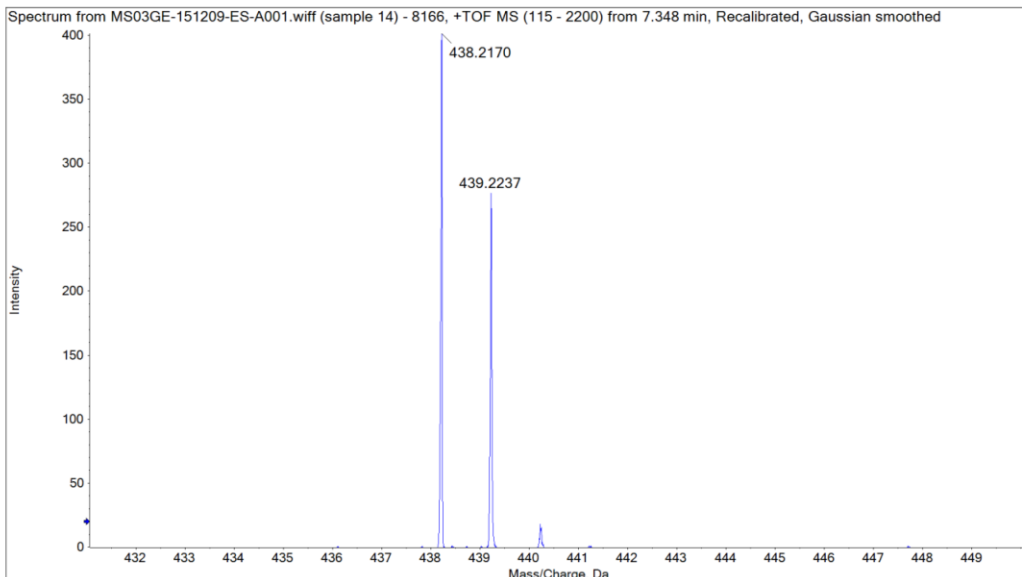

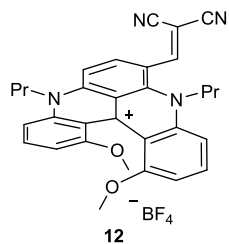

**<sup>1</sup>H NMR (400 MHz, CD<sub>2</sub>Cl<sub>2</sub>)**

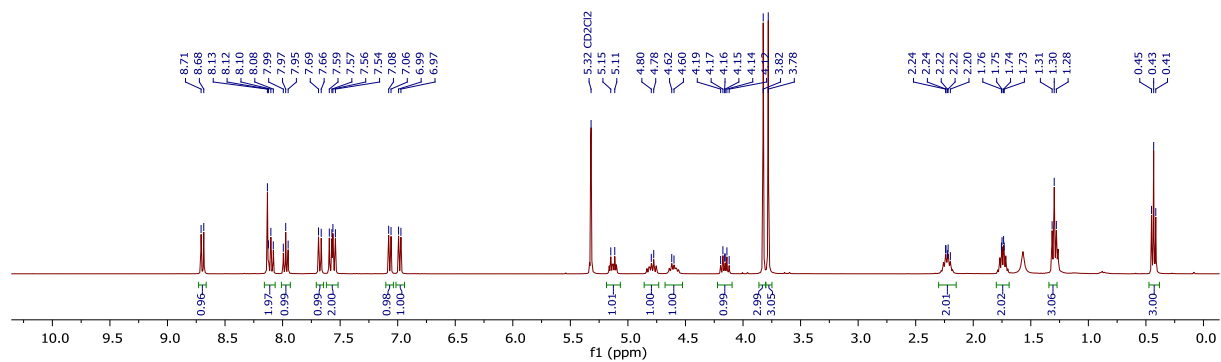

**<sup>13</sup>C NMR (101 MHz, CD<sub>2</sub>Cl<sub>2</sub>)**

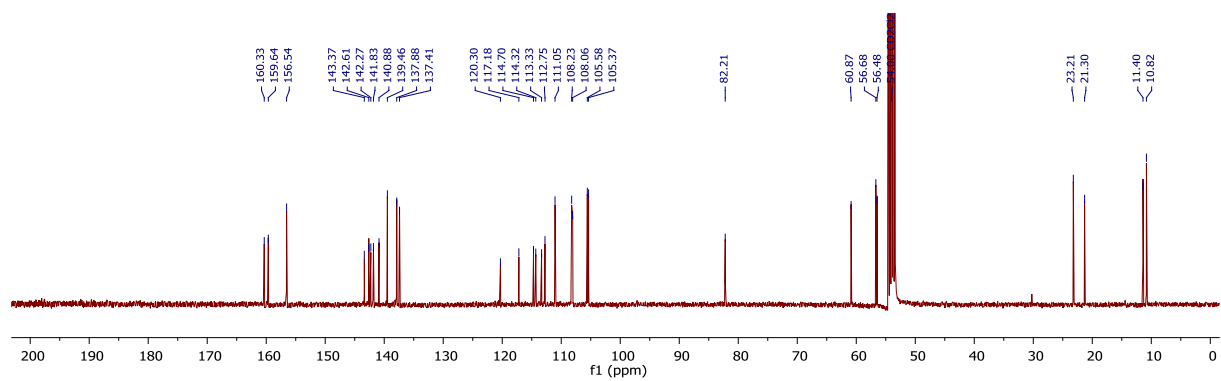

**<sup>19</sup>F NMR (282 MHz, CD<sub>2</sub>Cl<sub>2</sub>)**

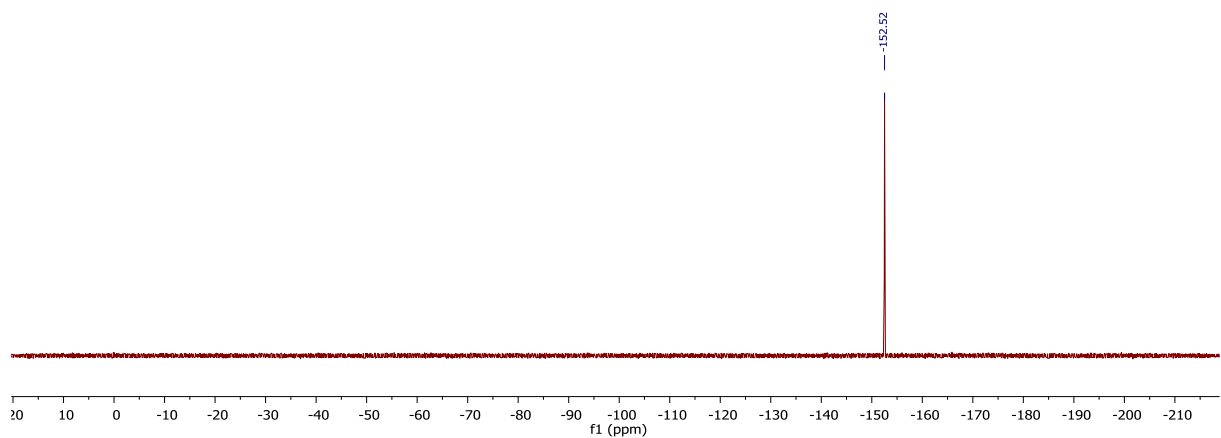

# UNIVERSITY OF GENEVA

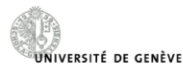

Faculty of Sciences

Sciences Mass Spectrometry

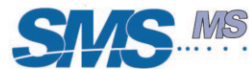

|                         |                     |                      |                         |
|-------------------------|---------------------|----------------------|-------------------------|
| Submitter:              | HERNANDEZ DELGADO   | Date of reception:   | 09/12/15                |
| Sample name:            | IH339               | Date of certificate: | 17/12/15                |
| Sample number:          | 8194                | Data filename:       | MS03GE-151216-HT-A001   |
| Operator:               | Harry Théraulaz     | Instrument:          | QSTAR XL (AB/MDS Sciex) |
| Principal investigator: | Dr. Sophie Michalet | Ionisation mode:     | ESI (positive mode)     |

| Expected Formula     | Observed $m/z$ [ $M$ ] <sup>+</sup> | Expected $m/z$ (amu) | Accuracy (ppm) |
|----------------------|-------------------------------------|----------------------|----------------|
| $C_{31}H_{29}N_4O_2$ | 489.2277                            | 489.2285             | -1.6           |

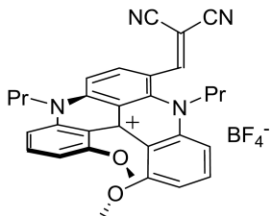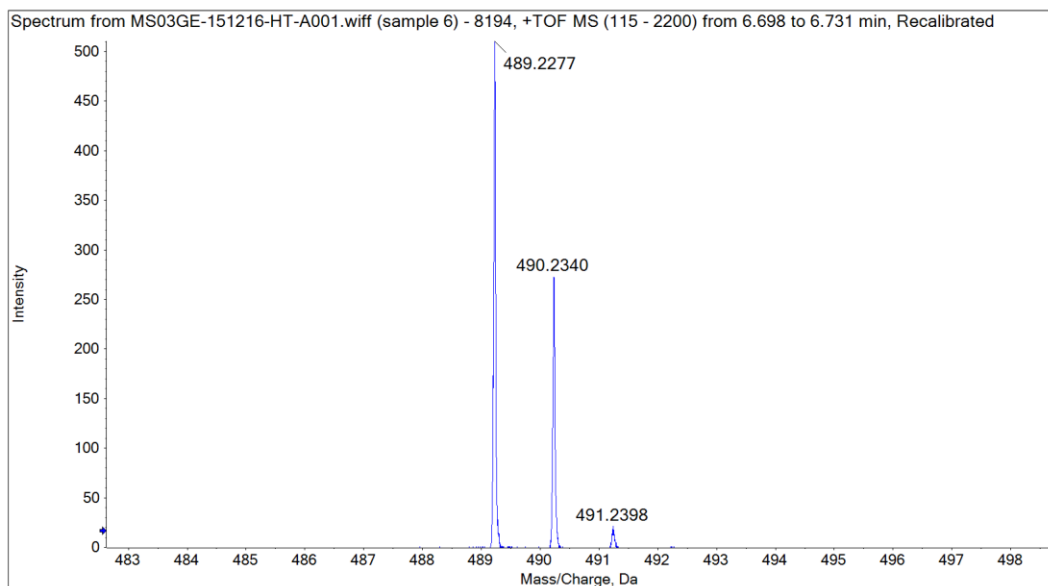

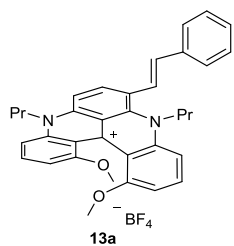

**<sup>1</sup>H NMR (400 MHz, CD<sub>2</sub>Cl<sub>2</sub>)**

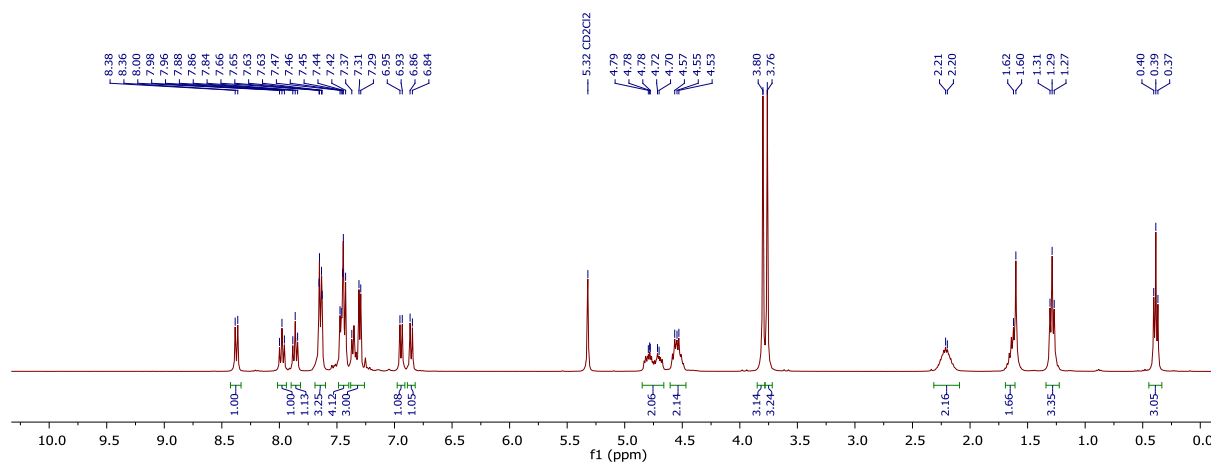

**<sup>13</sup>C NMR (101 MHz, CD<sub>2</sub>Cl<sub>2</sub>)**

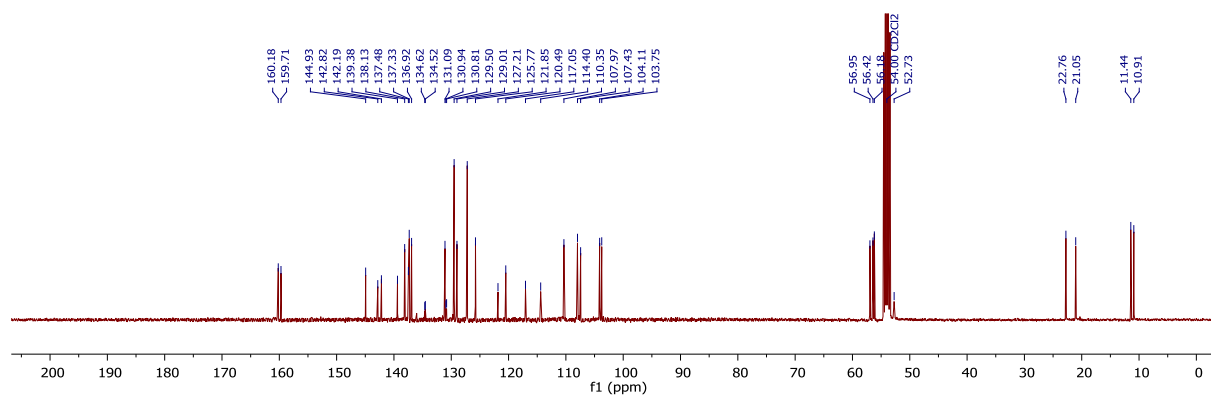

**<sup>19</sup>F NMR (282 MHz, CD<sub>2</sub>Cl<sub>2</sub>)**

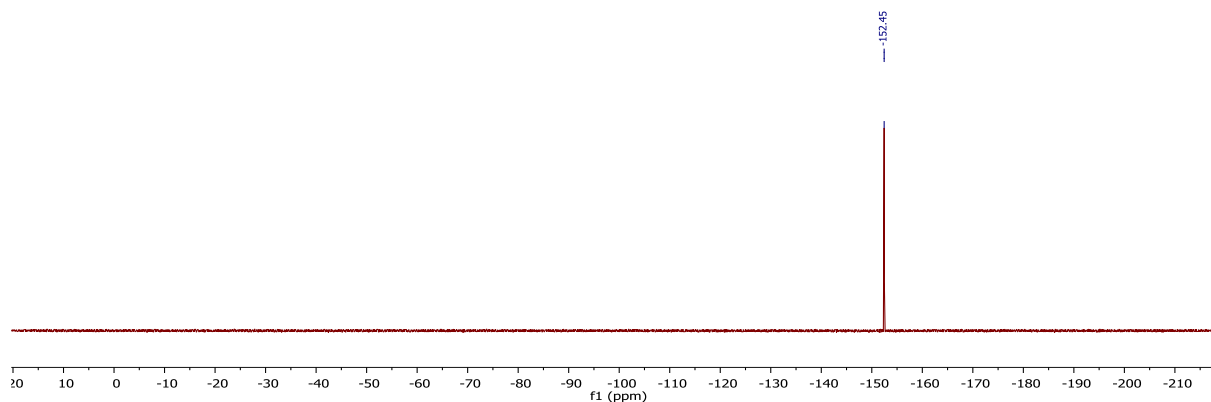

# UNIVERSITY OF GENEVA

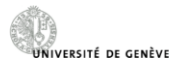

Faculty of Sciences

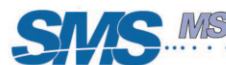

Sciences Mass Spectrometry

|                         |                     |                      |                         |
|-------------------------|---------------------|----------------------|-------------------------|
| Submitter:              | HERNANDEZ-DELGADO   | Date of reception:   | 03/12/15                |
| Sample name:            | IH447               | Date of certificate: | 10/12/15                |
| Sample number:          | 8164                | Data filename:       | MS03GE-151209-ES-A001   |
| Operator:               | Eliane Sandmeier    | Instrument:          | QSTAR XL (AB/MDS Sciex) |
| Principal investigator: | Dr. Sophie Michalet | Ionisation mode:     | ESI (positive mode)     |

| Expected Formula     | Observed $m/z$ [ $M$ ] <sup>+</sup> | Expected $m/z$ (amu) | Accuracy (ppm) |
|----------------------|-------------------------------------|----------------------|----------------|
| $C_{35}H_{35}N_2O_2$ | 515.2693                            | 515.2693             | -0.1           |

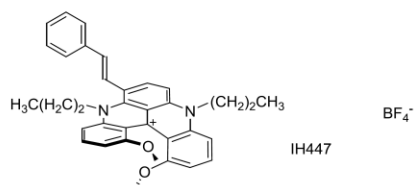

Chemical Formula:  $C_{35}H_{35}N_2O_2^+$   
 Exact Mass: 515.27  
 Molecular Weight: 602.48  
 $m/z$ : 515.27 (100.0%), 516.27 (38.7%),  
 517.28 (7.1%), 518.28 (1.0%)

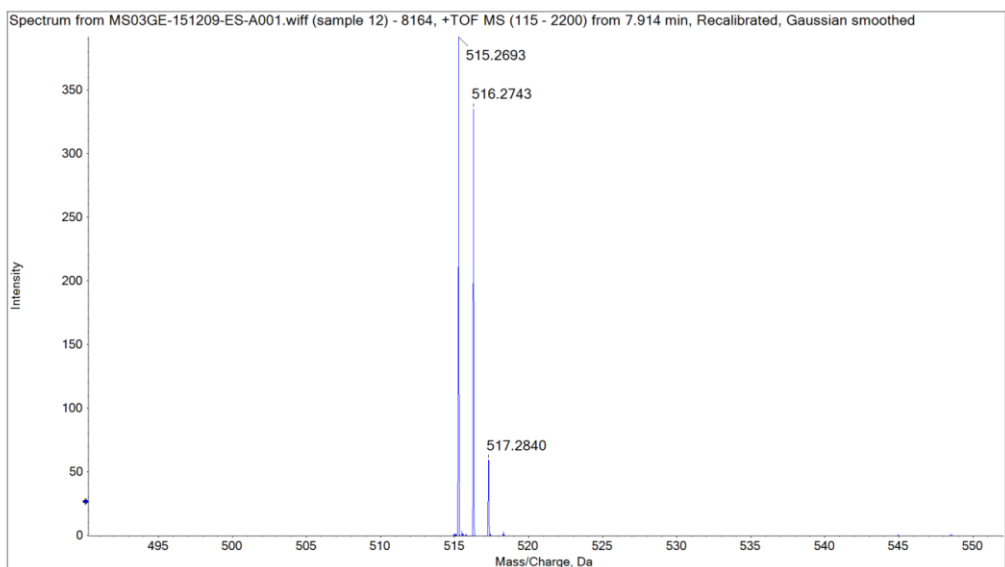



# UNIVERSITY OF GENEVA

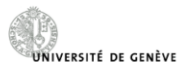

Faculty of Sciences

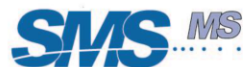

Sciences Mass Spectrometry

|                         |                     |                      |                         |
|-------------------------|---------------------|----------------------|-------------------------|
| Submitter:              | HERNANDEZ DELGADO   | Date of reception:   | 03/12/15                |
| Sample name:            | IH195               | Date of certificate: | 09/12/15                |
| Sample number:          | 8156                | Data filename:       | MS03GE-151208-HT-A001   |
| Operator:               | Harry Théraulaz     | Instrument:          | QSTAR XL (AB/MDS Sciex) |
| Principal investigator: | Dr. Sophie Michalet | Ionisation mode:     | ESI (positive mode)     |

| Expected Formula                                              | Observed $m/z$ [M] <sup>+</sup> | Expected $m/z$ (amu) | Accuracy (ppm) |
|---------------------------------------------------------------|---------------------------------|----------------------|----------------|
| C <sub>35</sub> H <sub>34</sub> N <sub>3</sub> O <sub>4</sub> | 560.2543                        | 560.2544             | -0.1           |

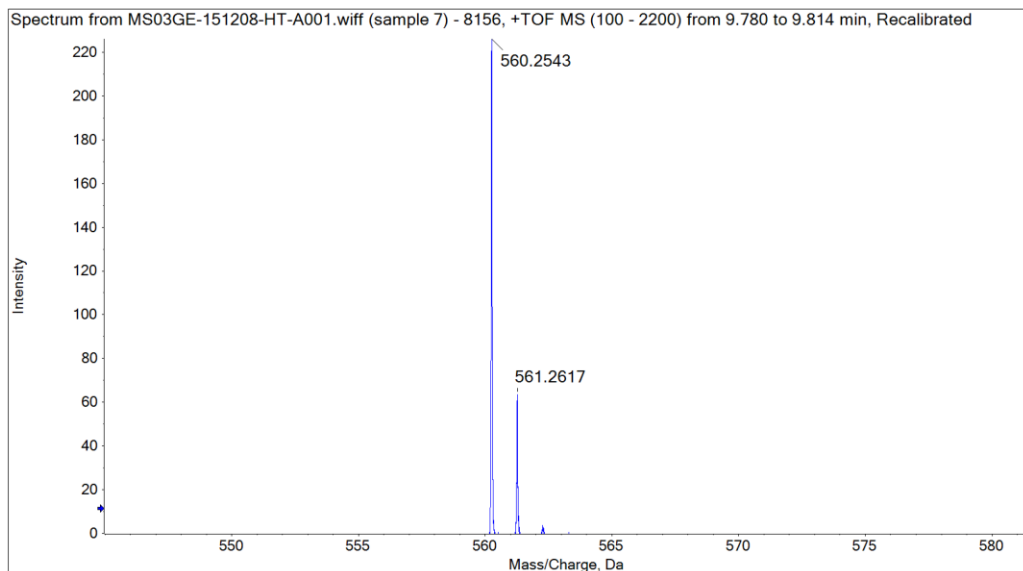



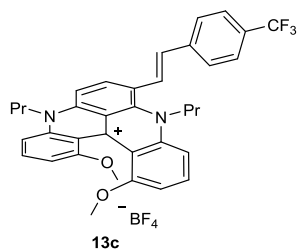

**<sup>1</sup>H NMR (400 MHz, CD<sub>2</sub>Cl<sub>2</sub>)**

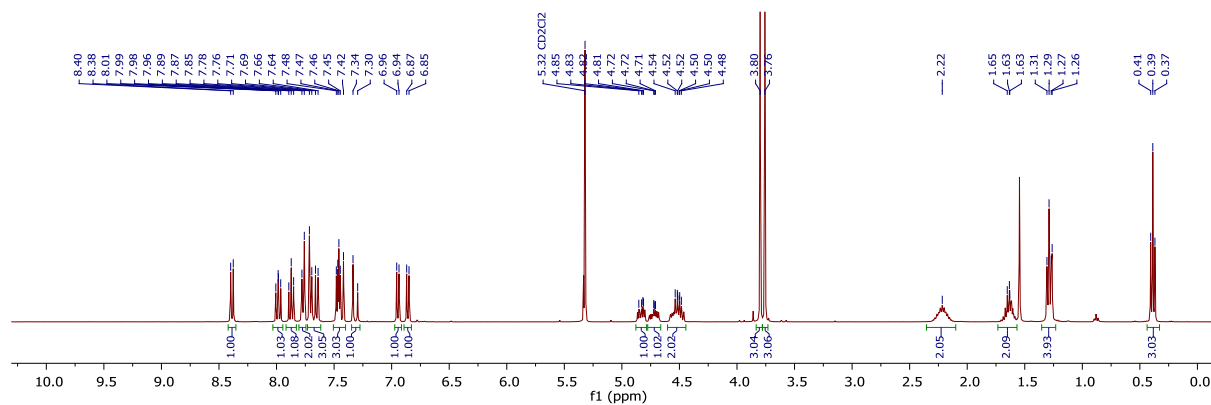

**<sup>13</sup>C NMR (101 MHz, CD<sub>2</sub>Cl<sub>2</sub>)**

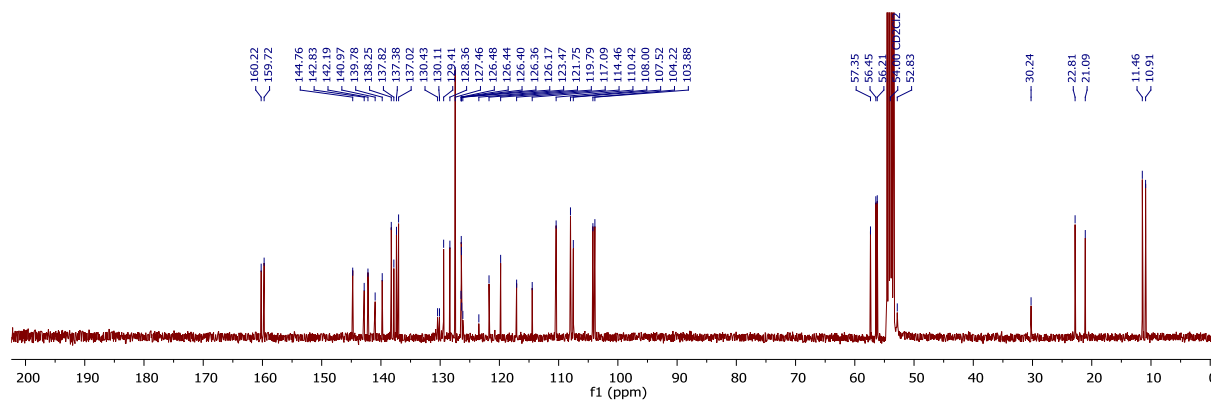

**<sup>19</sup>F NMR (282 MHz, CD<sub>2</sub>Cl<sub>2</sub>)**

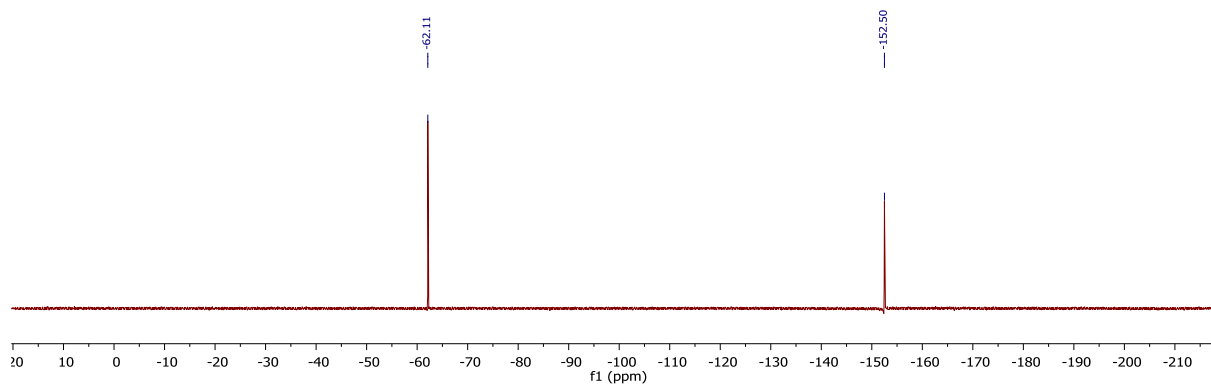

# UNIVERSITY OF GENEVA

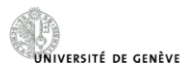

Faculty of Sciences

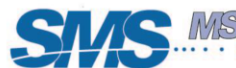

Sciences Mass Spectrometry

|                         |                     |                      |                         |
|-------------------------|---------------------|----------------------|-------------------------|
| Submitter:              | HERNANDEZ DELGADO   | Date of reception:   | 03/12/15                |
| Sample name:            | IH198               | Date of certificate: | 09/12/15                |
| Sample number:          | 8159                | Data filename:       | MS03GE-151208-HT-A001   |
| Operator:               | Harry Théraulaz     | Instrument:          | QSTAR XL (AB/MDS Sciex) |
| Principal investigator: | Dr. Sophie Michalet | Ionisation mode:     | ESI (positive mode)     |

| Expected Formula                                                             | Observed $m/z$ [M] <sup>+</sup> | Expected $m/z$ (amu) | Accuracy (ppm) |
|------------------------------------------------------------------------------|---------------------------------|----------------------|----------------|
| C <sub>36</sub> H <sub>34</sub> F <sub>3</sub> N <sub>2</sub> O <sub>2</sub> | 583.2586                        | 583.2567             | 3.3            |

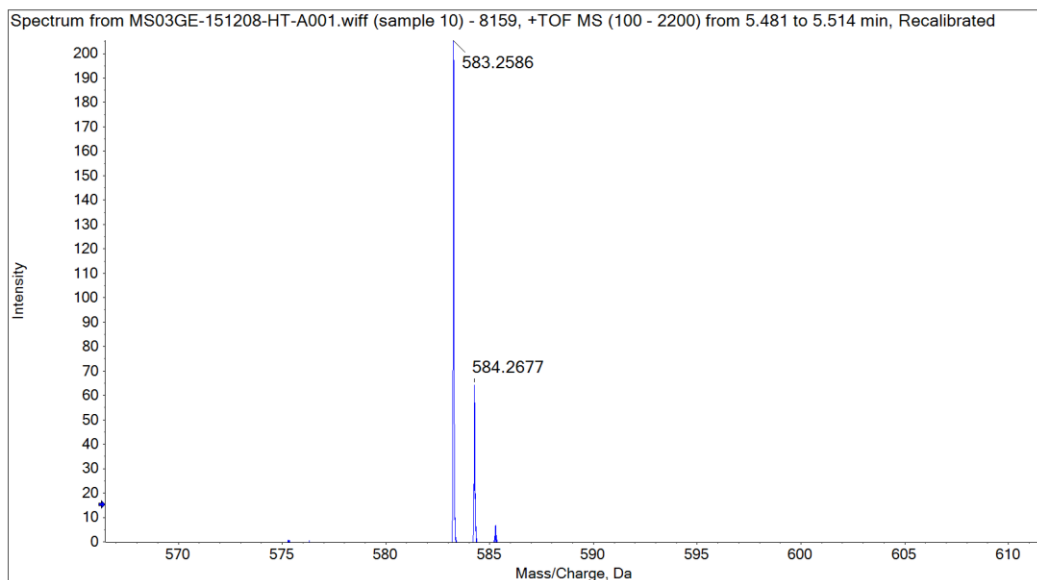

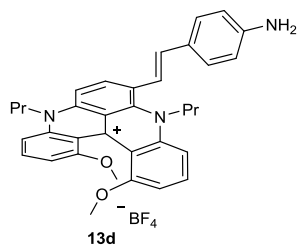

**<sup>1</sup>H NMR (400 MHz, CD<sub>2</sub>Cl<sub>2</sub>)**

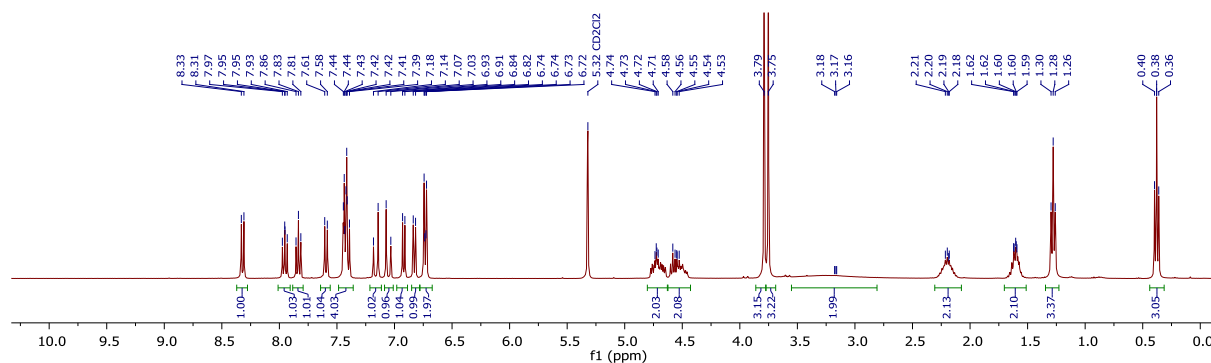

**<sup>13</sup>C NMR (101 MHz, CD<sub>2</sub>Cl<sub>2</sub>)**

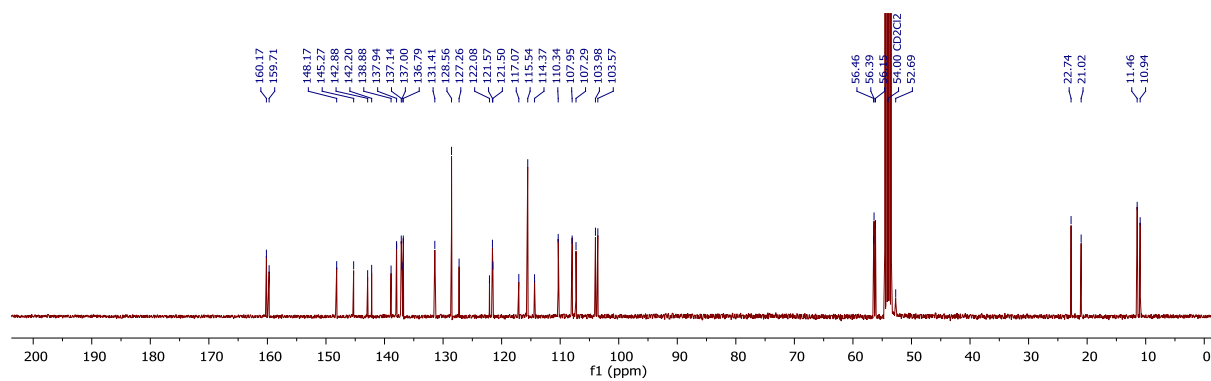

**<sup>19</sup>F NMR (282 MHz, CD<sub>2</sub>Cl<sub>2</sub>)**

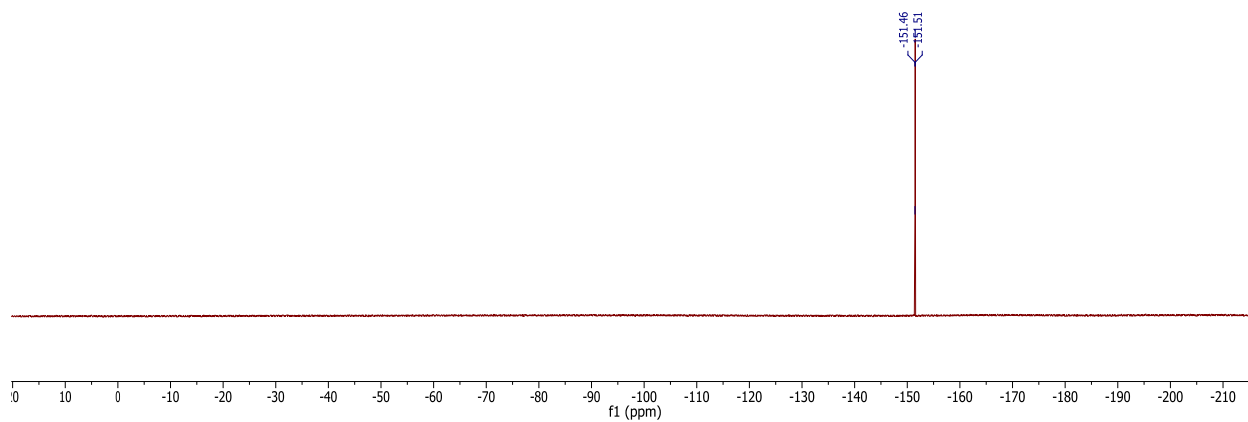

# UNIVERSITY OF GENEVA

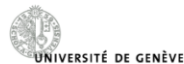

Faculty of Sciences

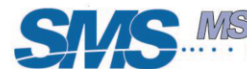

Sciences Mass Spectrometry

|                         |                     |                      |                         |
|-------------------------|---------------------|----------------------|-------------------------|
| Submitter:              | HERNANDEZ DELGADO   | Date of reception:   | 09/12/15                |
| Sample name:            | IH463               | Date of certificate: | 17/12/15                |
| Sample number:          | 8195                | Data filename:       | MS03GE-151216-HT-A001   |
| Operator:               | Harry Théraulaz     | Instrument:          | QSTAR XL (AB/MDS Sciex) |
| Principal investigator: | Dr. Sophie Michalet | Ionisation mode:     | ESI (positive mode)     |

| Expected Formula                                              | Observed $m/z$ [ $M$ ] <sup>+</sup> | Expected $m/z$ (amu) | Accuracy (ppm) |
|---------------------------------------------------------------|-------------------------------------|----------------------|----------------|
| C <sub>35</sub> H <sub>36</sub> N <sub>3</sub> O <sub>2</sub> | 530.2804                            | 530.2802             | 0.3            |

Spectrum from MS03GE-151216-HT-A001.wiff (sample 7) - 8195, +TOF MS (115 - 2200) from 8.097 to 8.130 min, Recalibrated

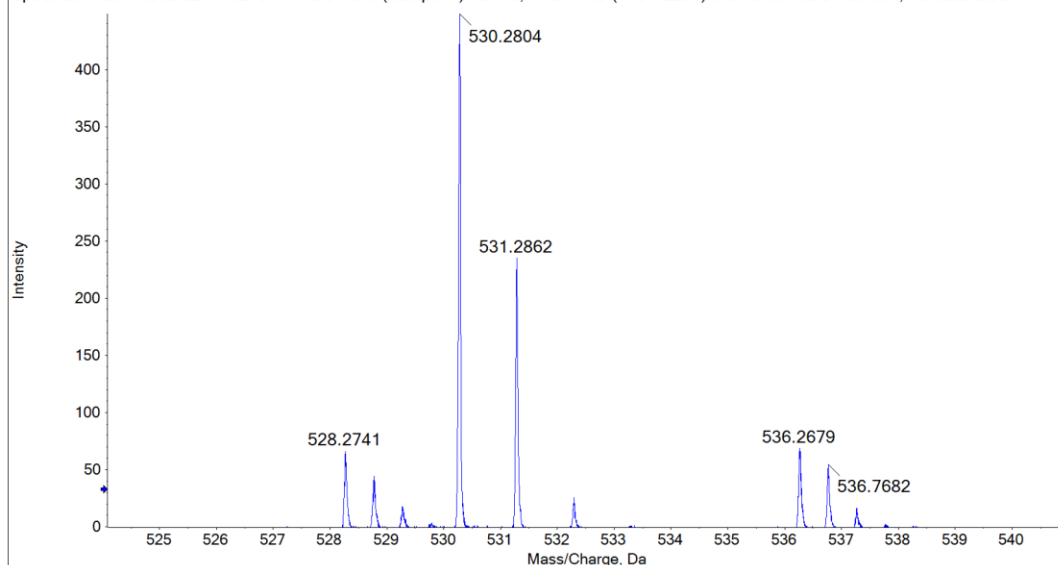

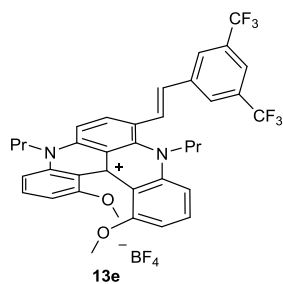

<sup>1</sup>H NMR (400 MHz, CD<sub>2</sub>Cl<sub>2</sub>)

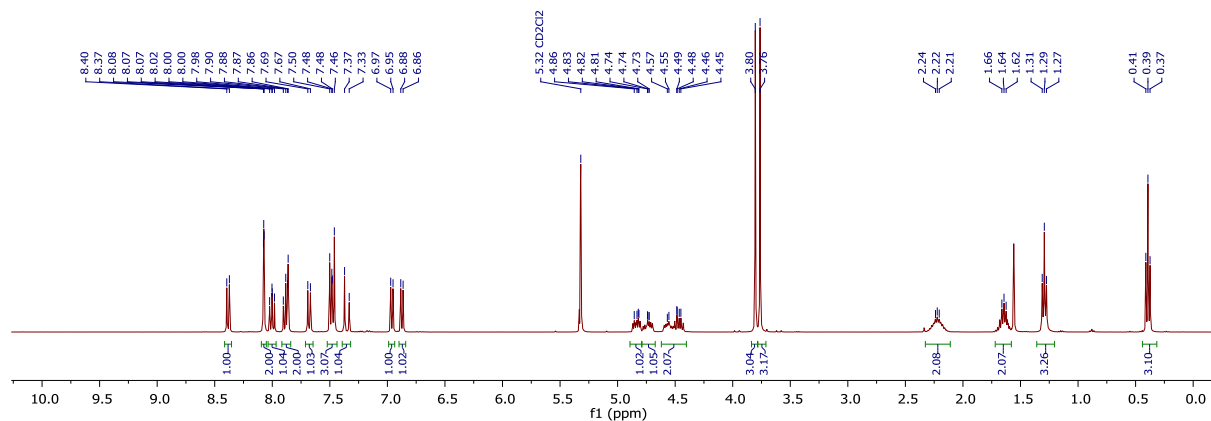

<sup>13</sup>C NMR (101 MHz, CD<sub>2</sub>Cl<sub>2</sub>)

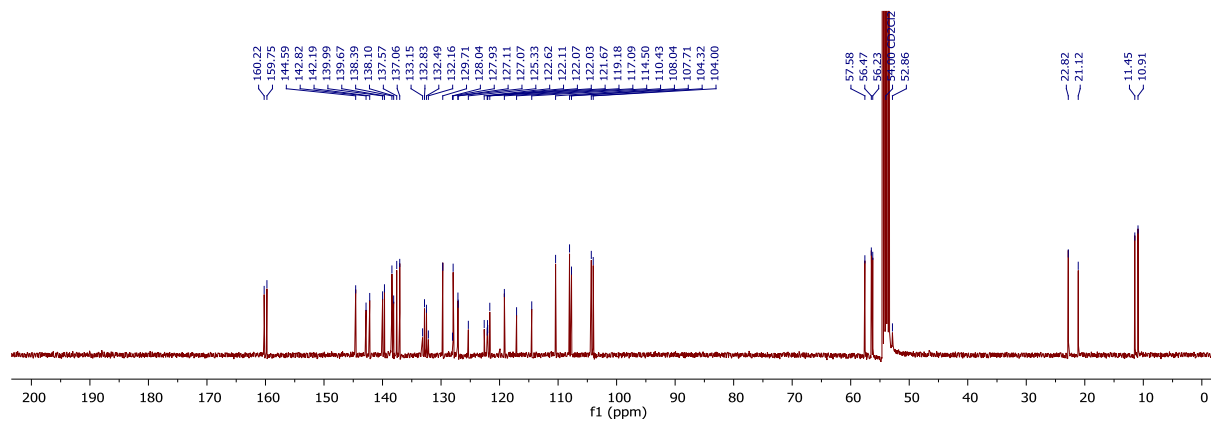

<sup>19</sup>F NMR (282 MHz, CD<sub>2</sub>Cl<sub>2</sub>)

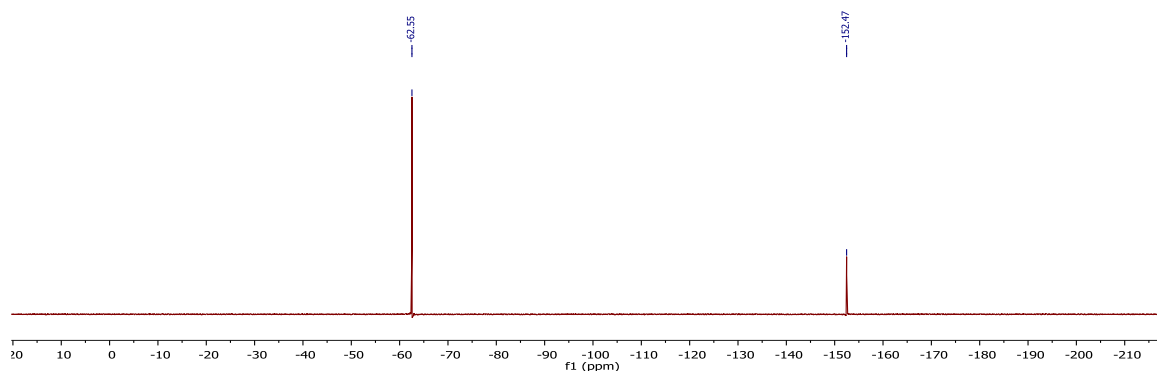

# UNIVERSITY OF GENEVA

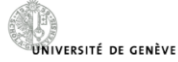

Faculty of Sciences

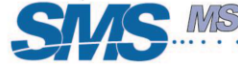

Sciences Mass Spectrometry

|                         |                     |                      |                         |
|-------------------------|---------------------|----------------------|-------------------------|
| Submitter:              | HERNANDEZ DELGADO   | Date of reception:   | 03/12/15                |
| Sample name:            | IH196               | Date of certificate: | 09/12/15                |
| Sample number:          | 8157                | Data filename:       | MS03GE-151208-HT-A001   |
| Operator:               | Harry Théraulaz     | Instrument:          | QSTAR XL (AB/MDS Sciex) |
| Principal investigator: | Dr. Sophie Michalet | Ionisation mode:     | ESI (positive mode)     |

| Expected Formula                                                             | Observed $m/z$ [M] <sup>+</sup> | Expected $m/z$ (amu) | Accuracy (ppm) |
|------------------------------------------------------------------------------|---------------------------------|----------------------|----------------|
| C <sub>37</sub> H <sub>33</sub> F <sub>6</sub> N <sub>2</sub> O <sub>2</sub> | 651.2415                        | 651.2441             | -3.9           |

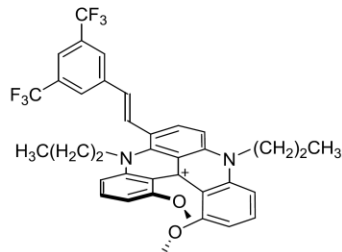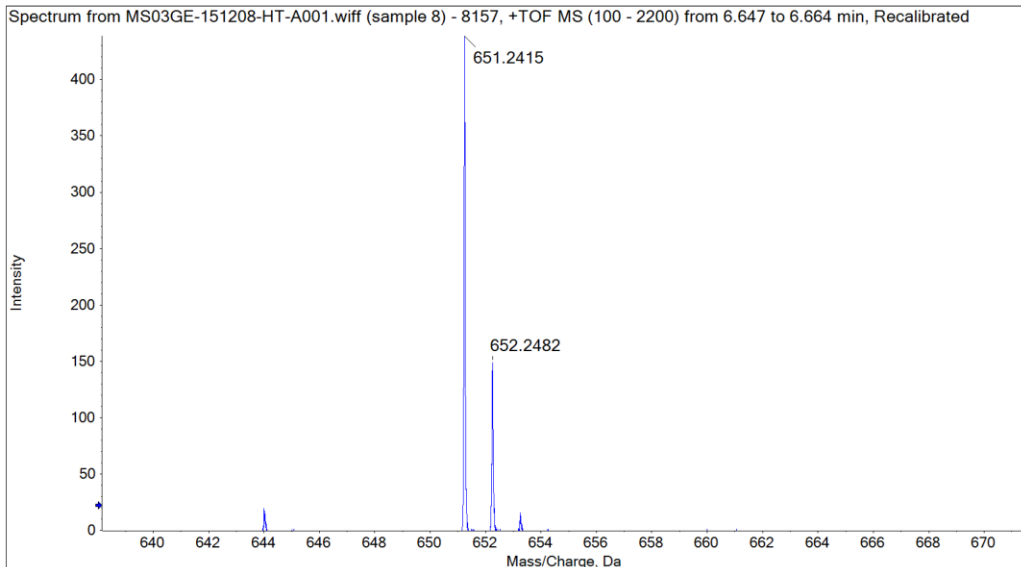

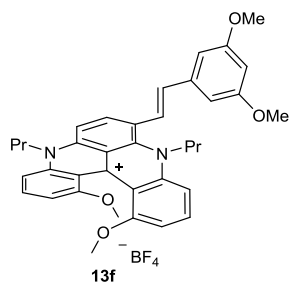

**<sup>1</sup>H NMR (400 MHz, CD<sub>2</sub>Cl<sub>2</sub>)**

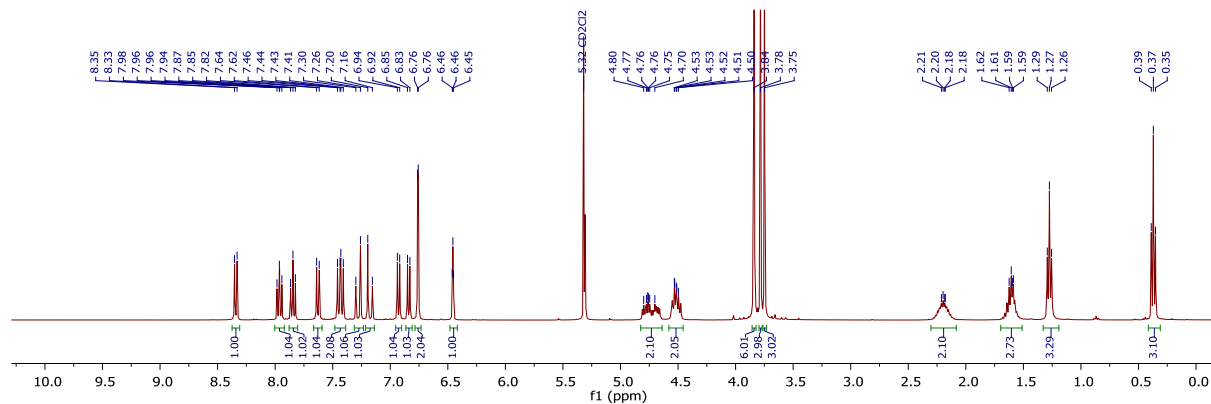

**<sup>13</sup>C NMR (101 MHz, CD<sub>2</sub>Cl<sub>2</sub>)**

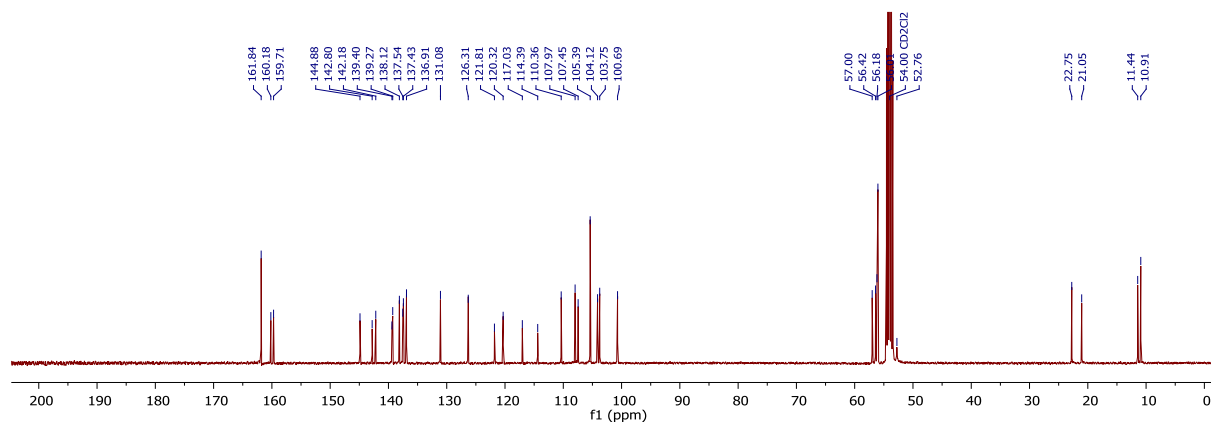

**<sup>19</sup>F NMR (282 MHz, CD<sub>2</sub>Cl<sub>2</sub>)**

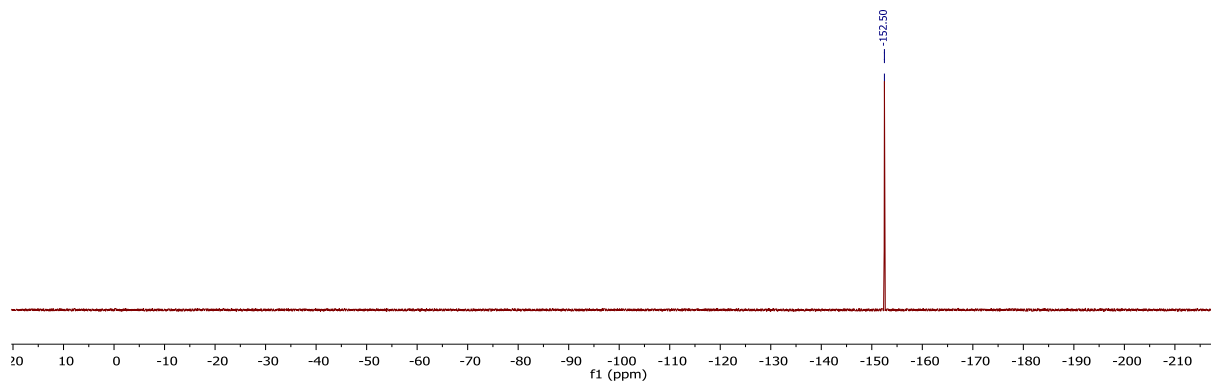

# UNIVERSITY OF GENEVA

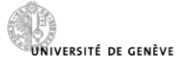

Faculty of Sciences

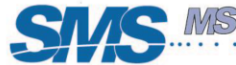

Sciences Mass Spectrometry

|                         |                     |                      |                         |
|-------------------------|---------------------|----------------------|-------------------------|
| Submitter:              | HERNANDEZ DELGADO   | Date of reception:   | 03/12/15                |
| Sample name:            | IH197               | Date of certificate: | 09/12/15                |
| Sample number:          | 8158                | Data filename:       | MS03GE-151208-HT-A001   |
| Operator:               | Harry Théraulaz     | Instrument:          | QSTAR XL (AB/MDS Sciex) |
| Principal investigator: | Dr. Sophie Michalet | Ionisation mode:     | ESI (positive mode)     |

| Expected Formula                                              | Observed $m/z$ [M] <sup>+</sup> | Expected $m/z$ (amu) | Accuracy (ppm) |
|---------------------------------------------------------------|---------------------------------|----------------------|----------------|
| C <sub>37</sub> H <sub>39</sub> N <sub>2</sub> O <sub>4</sub> | 575.2886                        | 575.2904             | -3.2           |

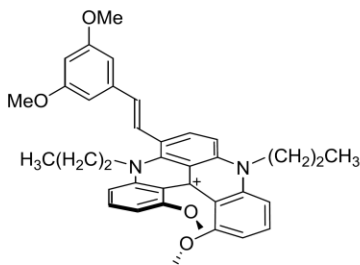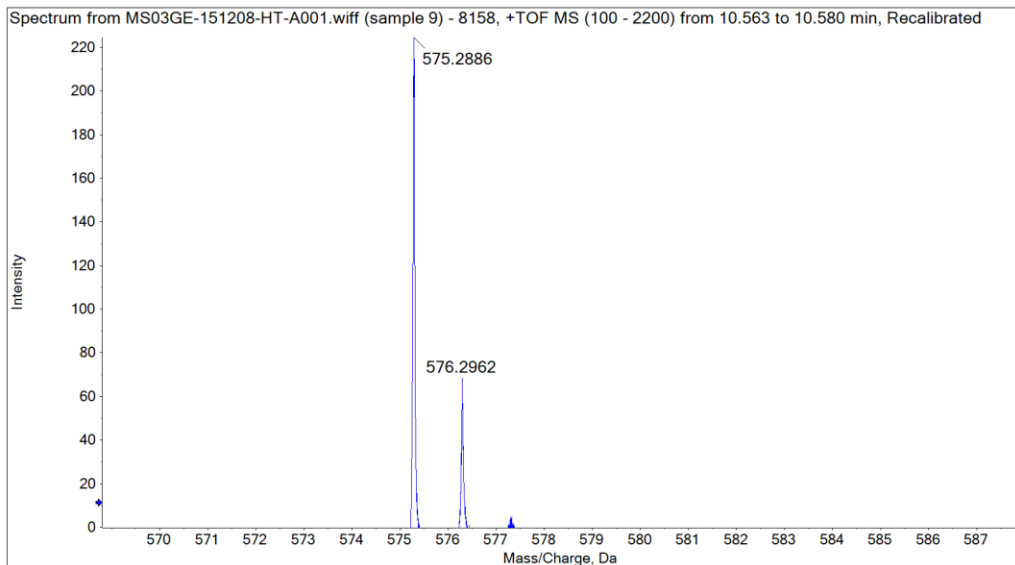



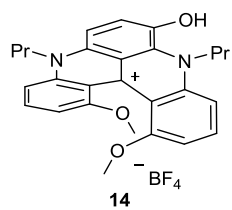

**<sup>1</sup>H NMR (500 MHz, CD<sub>2</sub>Cl<sub>2</sub>)**

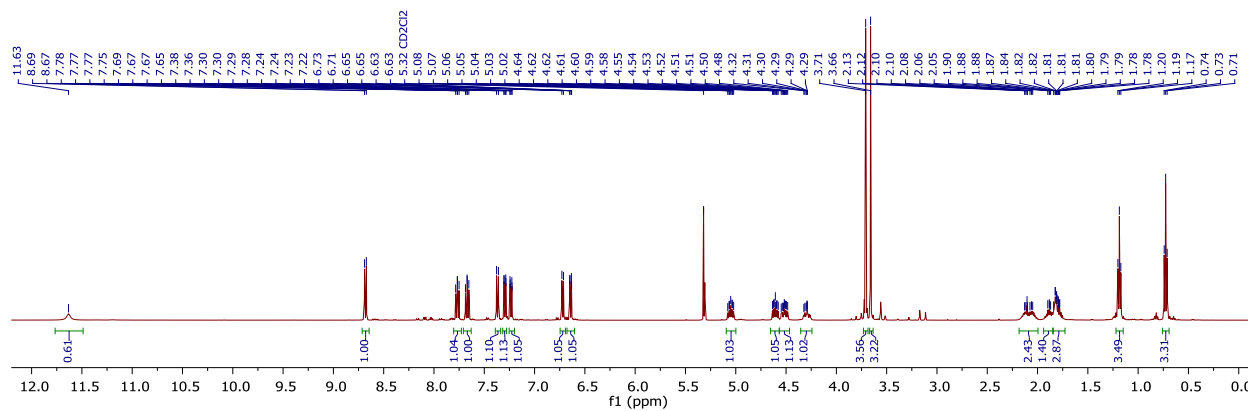

**<sup>13</sup>C NMR (125 MHz, CD<sub>2</sub>Cl<sub>2</sub>)**

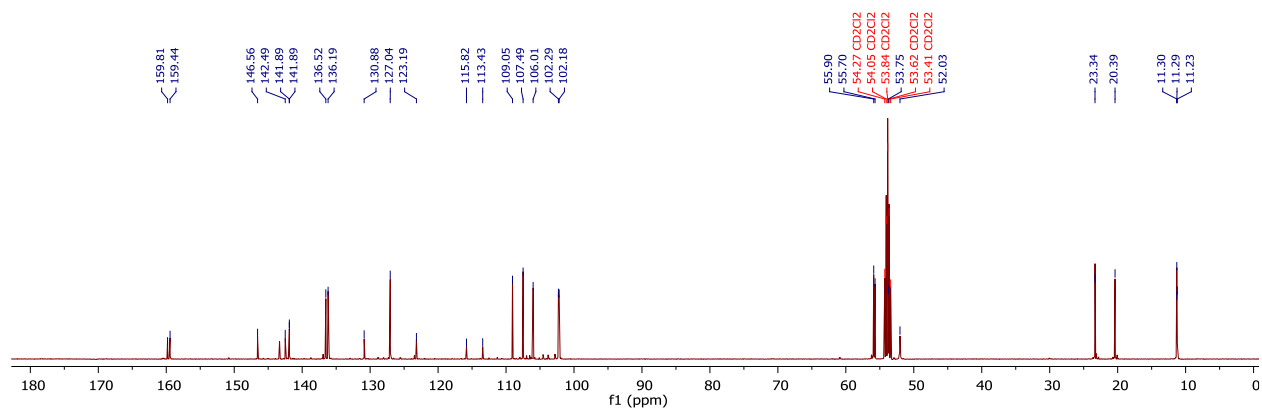

**<sup>19</sup>F NMR (282 MHz, CD<sub>2</sub>Cl<sub>2</sub>)**

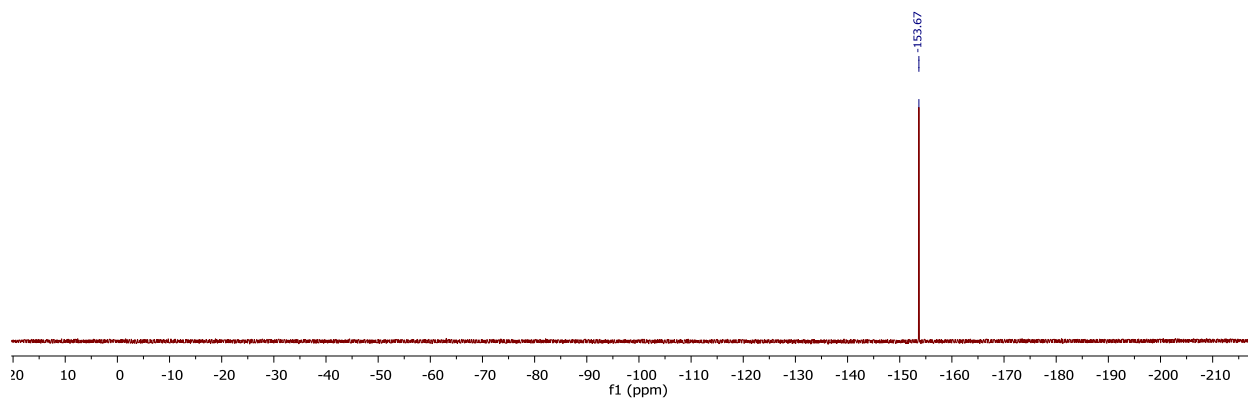

# UNIVERSITY OF GENEVA

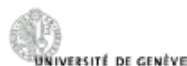

Faculty of Sciences

Sciences Mass Spectrometry

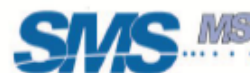

|                         |                     |                      |                             |
|-------------------------|---------------------|----------------------|-----------------------------|
| Submitter:              | Simon Pascal        | Date of reception:   | 29/05/15                    |
| Sample name:            | SPA094              | Date of certificate: | 10/06/15                    |
| Sample number:          | 7904                | Data filename:       | SMS10GE-150608-ES-A002      |
| Operator:               | Julien Meyer        | Instrument:          | QSTAR Pulsar (AB/MDS Sciex) |
| Principal investigator: | Dr. Sophie Michalet | Ionisation mode:     | ESI (positive mode)         |

| Expected Formula       | Observed $m/z$ $[M+H]^+$ | Expected $m/z$ (amu) | Accuracy (ppm) |
|------------------------|--------------------------|----------------------|----------------|
| $C_{27}H_{29}N_2O_3^+$ | 429.2159                 | 429.2173             | -3.1           |

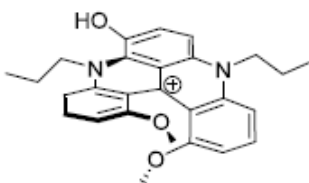

Spectrum from SMS10GE-150608-ES-A002.wiff (sample 6) - 7904, +TOF MS (115 - 2500) from 5.250 min, Recalibrated

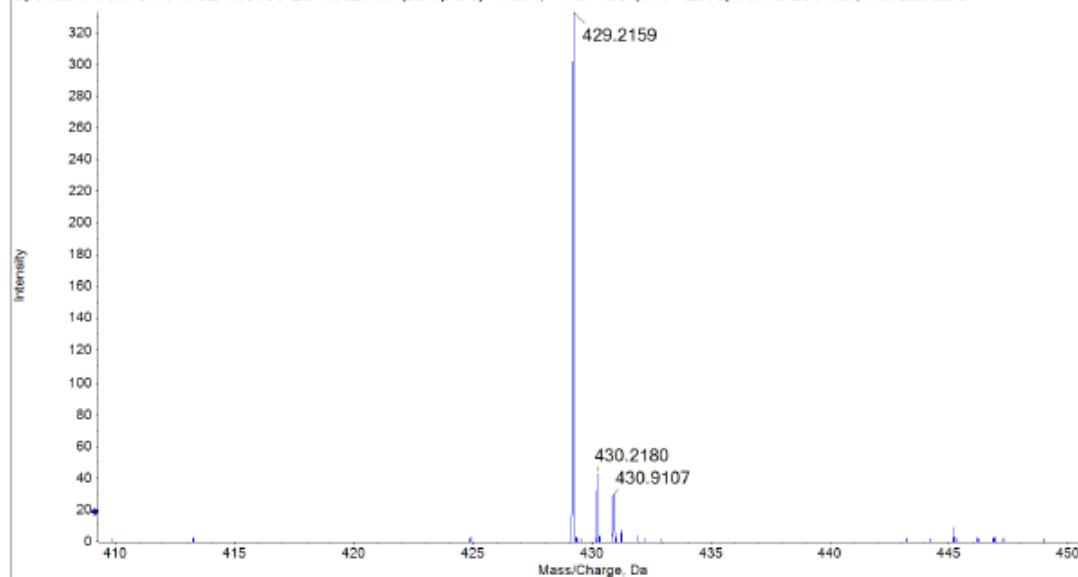

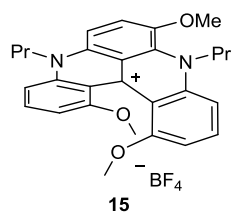

**<sup>1</sup>H NMR (500 MHz, CD<sub>2</sub>Cl<sub>2</sub>/CD<sub>3</sub>OD, 1:1)**

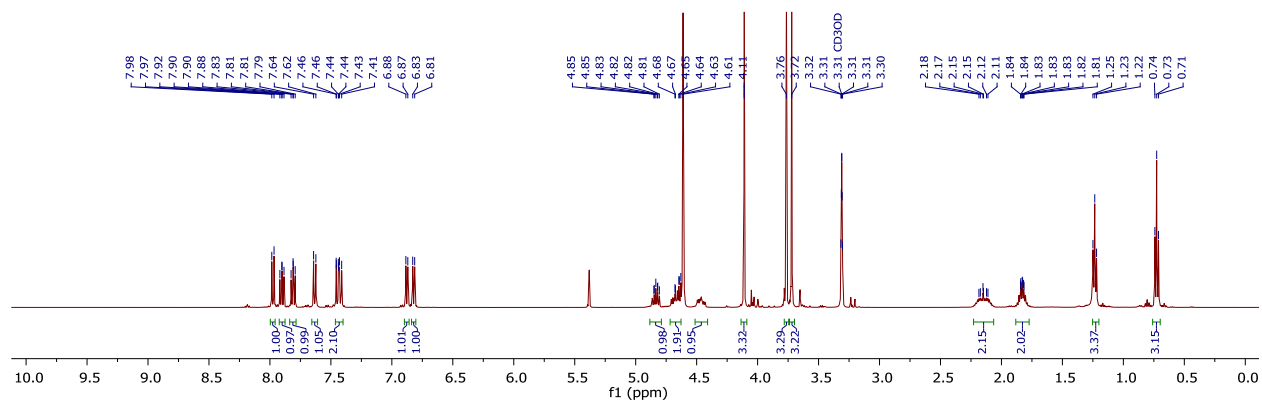

**<sup>13</sup>C NMR (125 MHz, CD<sub>2</sub>Cl<sub>2</sub>/CD<sub>3</sub>OD, 1:1)**

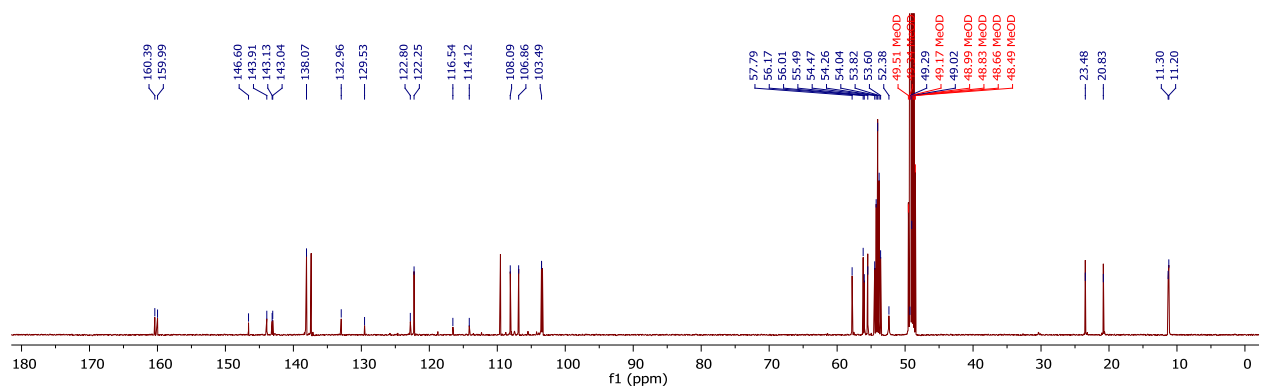

**<sup>19</sup>F NMR (282 MHz, CD<sub>2</sub>Cl<sub>2</sub>/CD<sub>3</sub>OD, 1:1)**

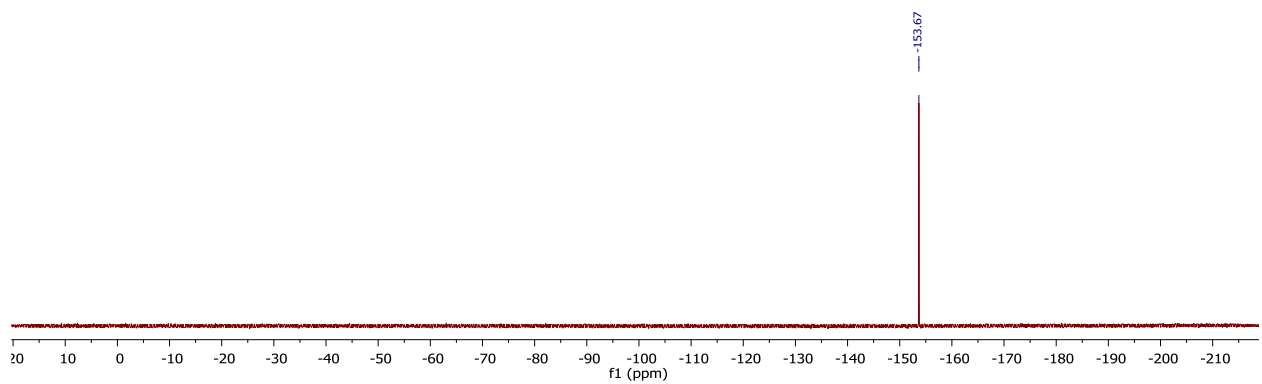

# UNIVERSITY OF GENEVA

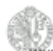

UNIVERSITÉ DE GENÈVE

Faculty of Sciences

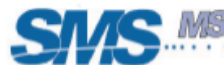

Sciences Mass Spectrometry

|                         |                     |                      |                             |
|-------------------------|---------------------|----------------------|-----------------------------|
| Submitter:              | PASCAL              | Date of reception:   | 12/06/15                    |
| Sample name:            | SPA099              | Date of certificate: | 18/06/15                    |
| Sample number:          | 7926                | Data filename:       | SMS10GE-150617-ES-A003      |
| Operator:               | Eliane Sandmeier    | Instrument:          | QSTAR Pulsar (AB/MDS Sciex) |
| Principal investigator: | Dr. Sophie Michalet | Ionisation mode:     | ESI (positive mode)         |

| Expected Formula                                              | Observed $m/z$ [M] <sup>+</sup> | Expected $m/z$ (amu) | Accuracy (ppm) |
|---------------------------------------------------------------|---------------------------------|----------------------|----------------|
| C <sub>28</sub> H <sub>31</sub> N <sub>2</sub> O <sub>3</sub> | 443.2326                        | 443.2329             | -0.6           |

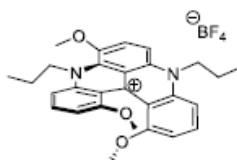

**SPA099**

Chemical Formula: C<sub>28</sub>H<sub>31</sub>N<sub>2</sub>O<sub>3</sub><sup>+</sup>

Exact Mass: 443.2329

Molecular Weight: 443.5568

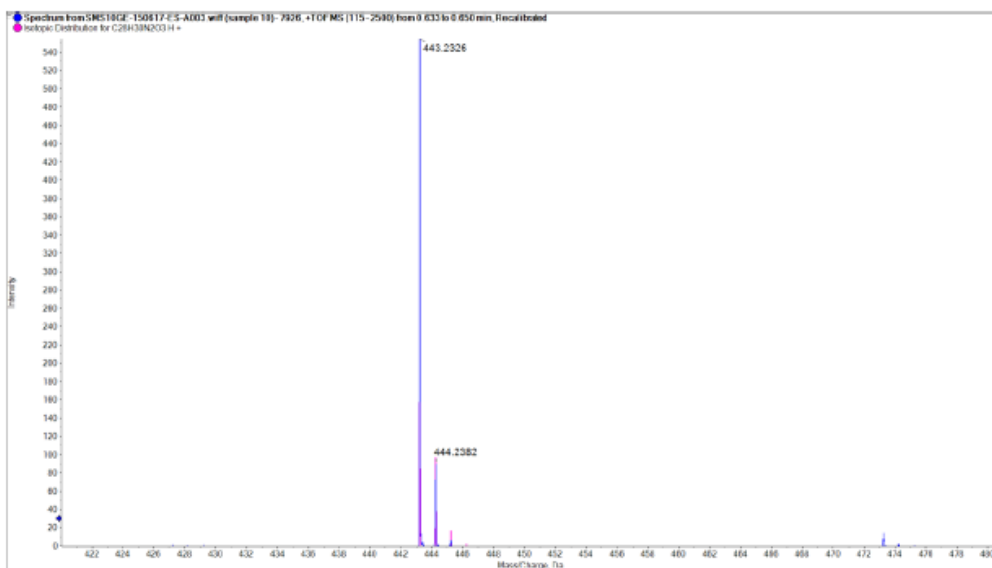

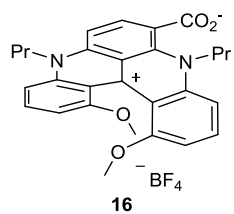

**<sup>1</sup>H NMR (500 MHz, CD<sub>3</sub>OD)**

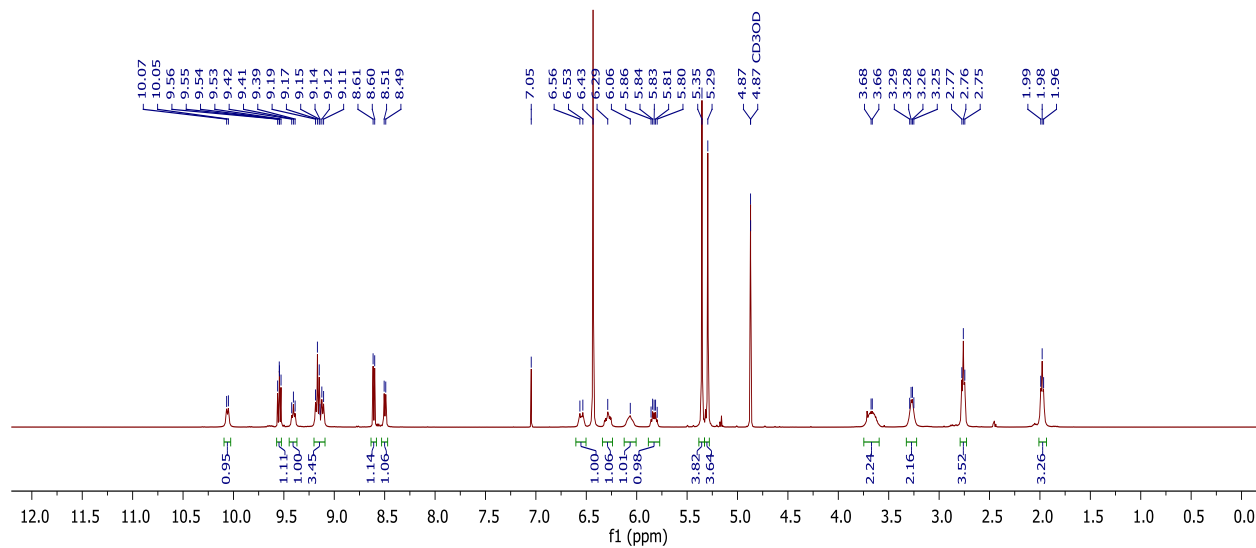

**<sup>13</sup>C NMR (125 MHz, CD<sub>3</sub>OD)**

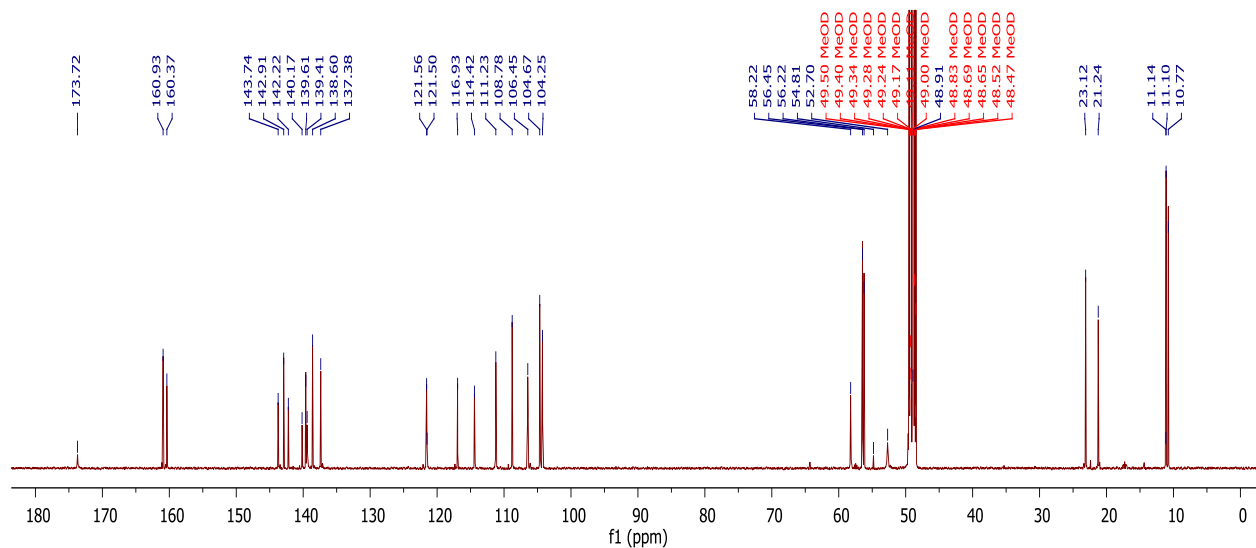

# UNIVERSITY OF GENEVA

Faculty of Sciences

Sciences Mass Spectrometry

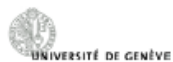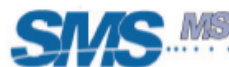

|                         |                     |                      |                             |
|-------------------------|---------------------|----------------------|-----------------------------|
| Submitter:              | PASCAL              | Date of reception:   | 13/02/15                    |
| Sample name:            | SPA036              | Date of certificate: | 17/02/15                    |
| Sample number:          | 7693                | Data filename:       | SMS10GE-150216-ES-A002      |
| Operator:               | Eliane Sandmeier    | Instrument:          | QSTAR Pulsar (AB/MDS Sciex) |
| Principal investigator: | Dr. Sophie Michalet | Ionisation mode:     | ESI (positive mode)         |

| Expected Formula                                              | Observed $m/z$ [M] <sup>+</sup> | Expected $m/z$ (amu) | Accuracy (ppm) |
|---------------------------------------------------------------|---------------------------------|----------------------|----------------|
| C <sub>28</sub> H <sub>29</sub> N <sub>2</sub> O <sub>4</sub> | 457.2120                        | 457.2122             | -0.4           |

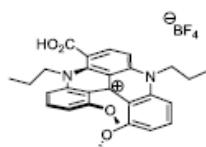

**SPA036**

Chemical Formula: C<sub>28</sub>H<sub>29</sub>N<sub>2</sub>O<sub>4</sub><sup>+</sup>

Exact Mass: 457,2122

Molecular Weight: 457,5403

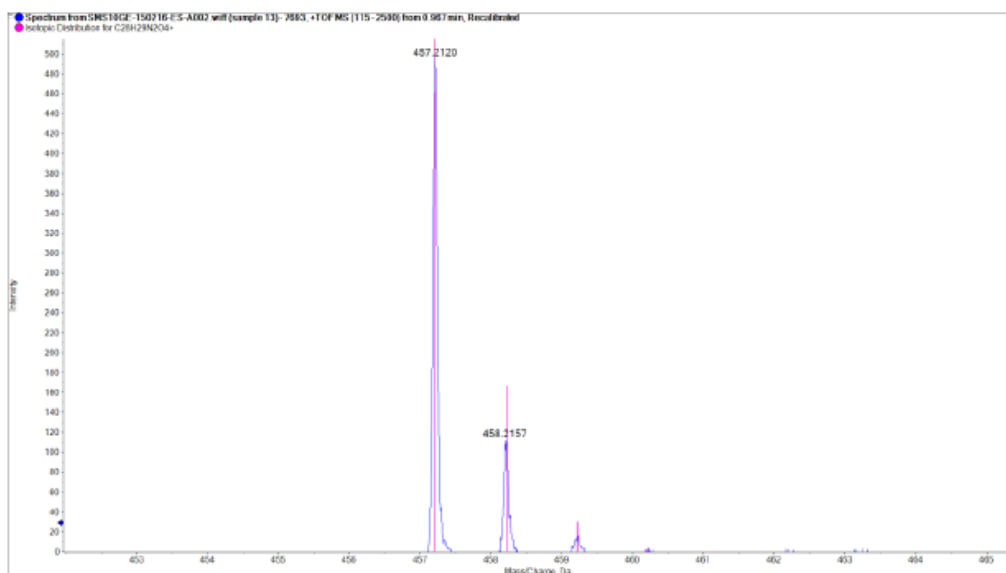

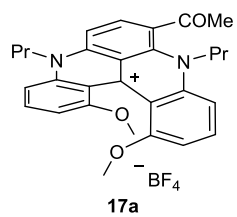

<sup>1</sup>H NMR (500 MHz, CD<sub>2</sub>Cl<sub>2</sub>)

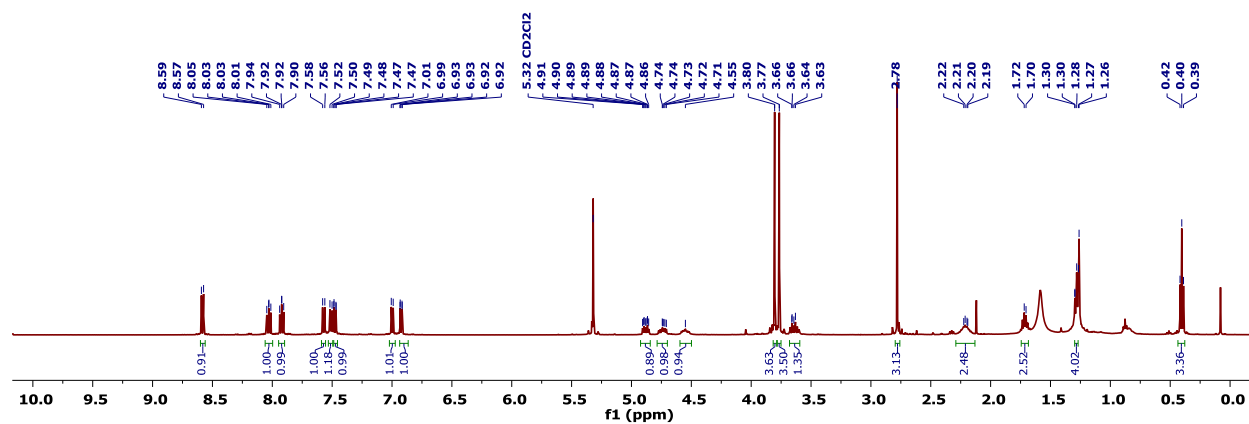

<sup>13</sup>C NMR (125 MHz, CD<sub>2</sub>Cl<sub>2</sub>)

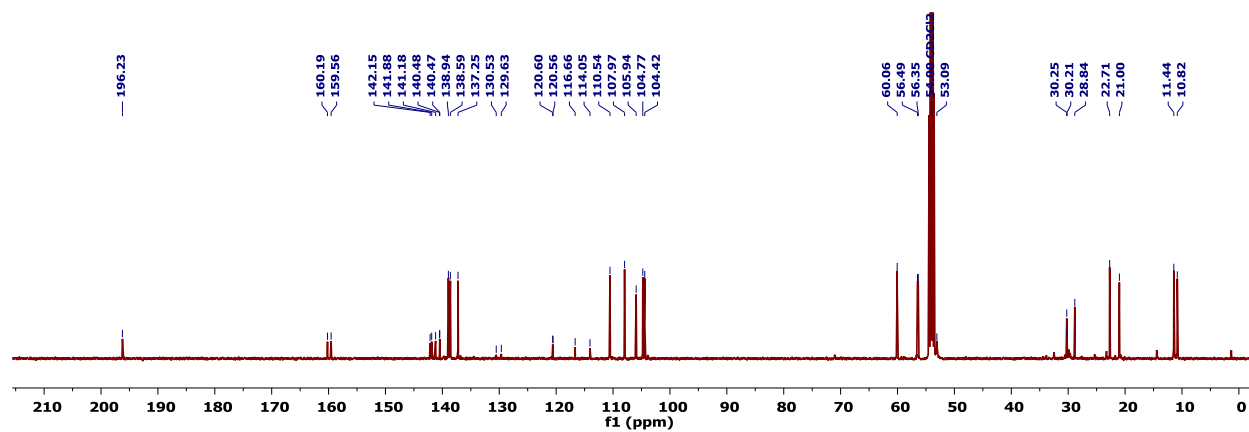

<sup>19</sup>F NMR (282 MHz, CD<sub>2</sub>Cl<sub>2</sub>)

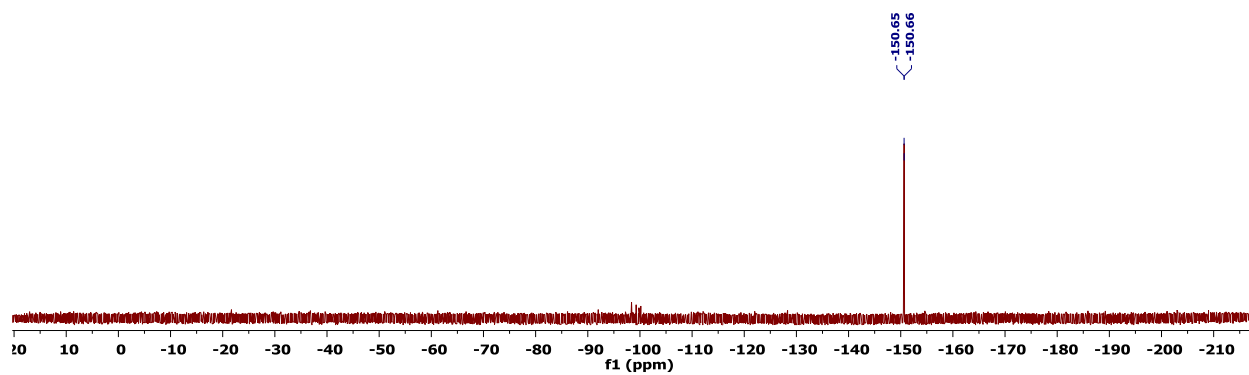

# UNIVERSITY OF GENEVA

Faculty of Sciences

Sciences Mass Spectrometry

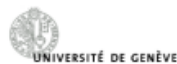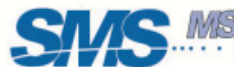

|                         |                     |                      |                             |
|-------------------------|---------------------|----------------------|-----------------------------|
| Submitter:              | Romain Duwald       | Date of reception:   | 07/09/15                    |
| Sample name:            | DuR263              | Date of certificate: | 21/09/15                    |
| Sample number:          | 8046                | Data filename:       | SMS10GE-150918-JM-A001      |
| Operator:               | Julien Meyer        | Instrument:          | QSTAR Pulsar (AB/MDS Sciex) |
| Principal investigator: | Dr. Sophie Michalet | Ionisation mode:     | ESI (positive mode)         |

| Expected Formula     | Observed $m/z$ [ $M$ ] <sup>+</sup> | Expected $m/z$ (amu) | Accuracy (ppm) |
|----------------------|-------------------------------------|----------------------|----------------|
| $C_{29}H_{31}O_3N_2$ | 455.2329                            | 455.2328             | -0.2           |

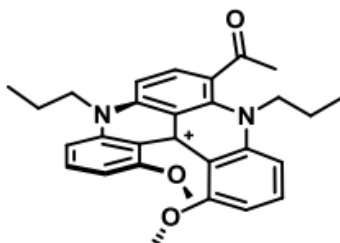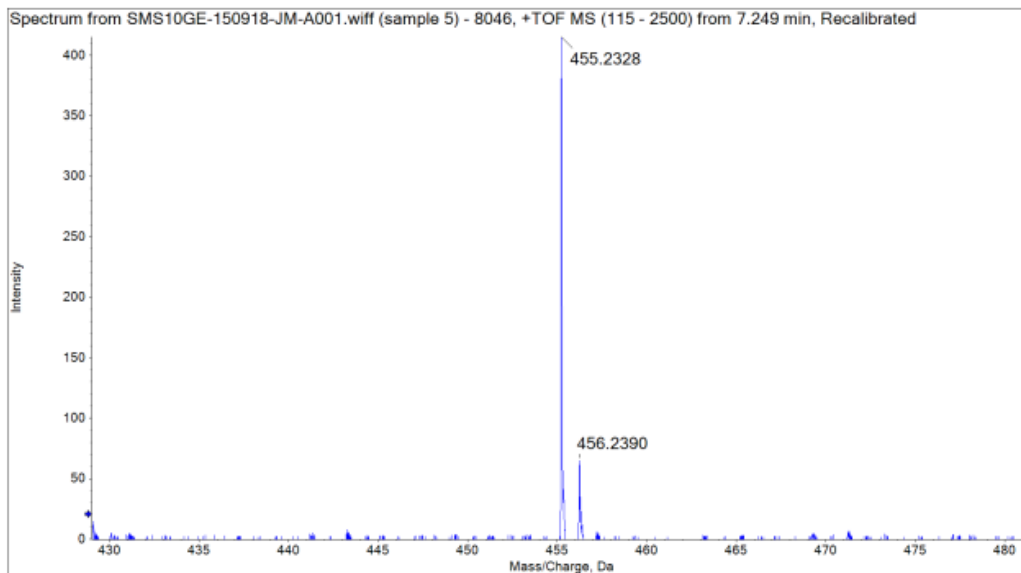



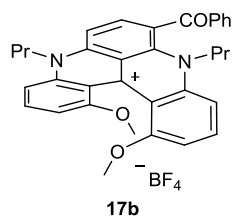

<sup>1</sup>H NMR (500 MHz, CD<sub>2</sub>Cl<sub>2</sub>)

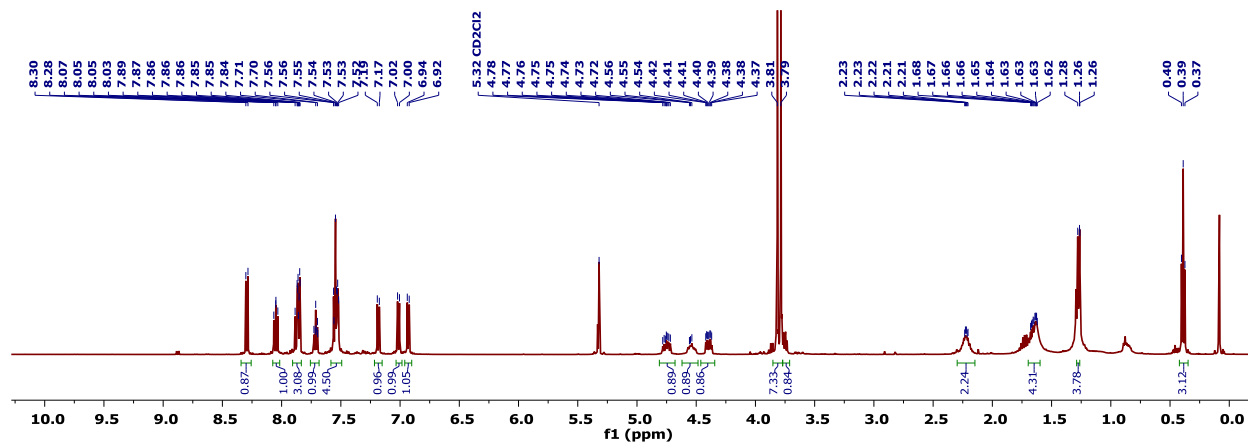

<sup>13</sup>C NMR (125 MHz, CD<sub>2</sub>Cl<sub>2</sub>)

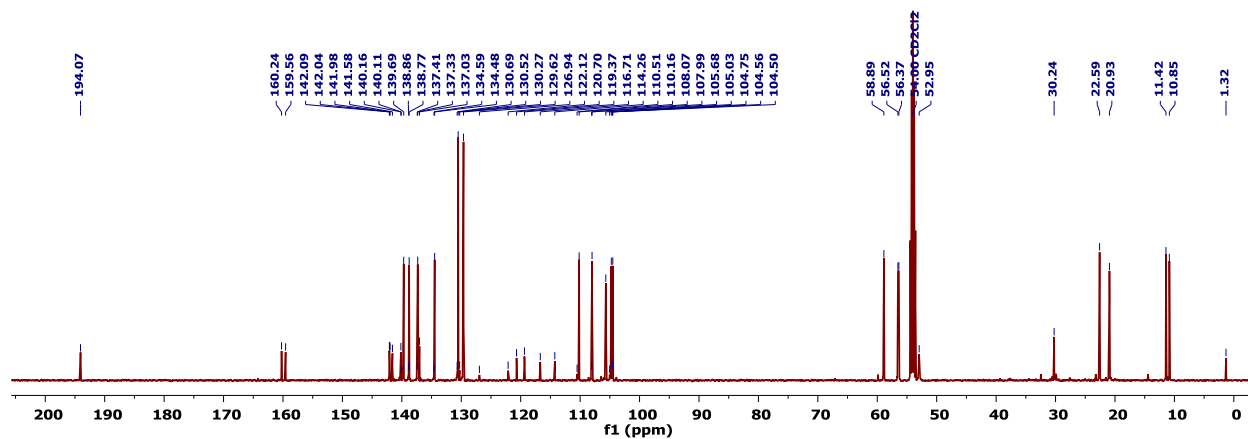

<sup>19</sup>F NMR (282 MHz, CD<sub>2</sub>Cl<sub>2</sub>)

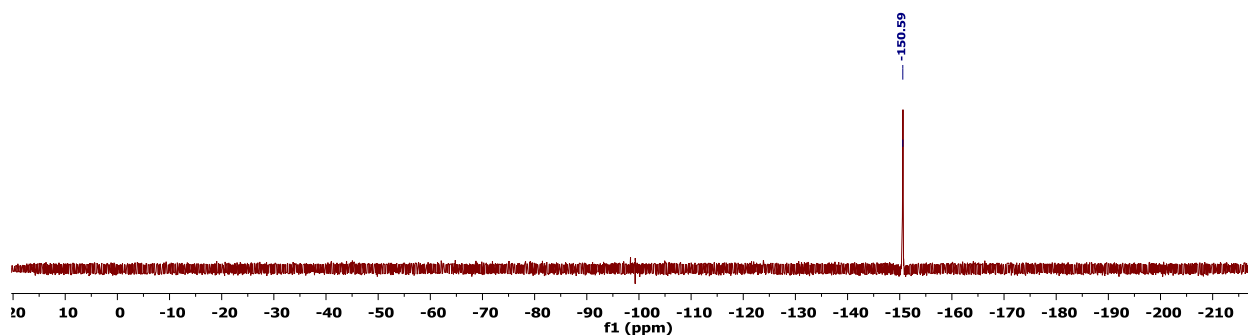

# UNIVERSITY OF GENEVA

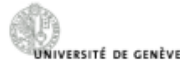

Faculty of Sciences

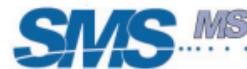

Sciences Mass Spectrometry

|                         |                     |                      |                             |
|-------------------------|---------------------|----------------------|-----------------------------|
| Submitter:              | Romain Duwald       | Date of reception:   | 07/09/15                    |
| Sample name:            | DuR260              | Date of certificate: | 22/09/15                    |
| Sample number:          | 8045                | Data filename:       | SMS10GE-150916-HT-A001      |
| Operator:               | Harry Théraulaz     | Instrument:          | QSTAR Pulsar (AB/MDS Sciex) |
| Principal investigator: | Dr. Sophie Michalet | Ionisation mode:     | ESI (positive mode)         |

| Expected Formula                                              | Observed $m/z$ [M] <sup>+</sup> | Expected $m/z$ (amu) | Accuracy (ppm) |
|---------------------------------------------------------------|---------------------------------|----------------------|----------------|
| C <sub>34</sub> H <sub>33</sub> N <sub>2</sub> O <sub>3</sub> | 517.2501                        | 517.2486             | 2.9            |

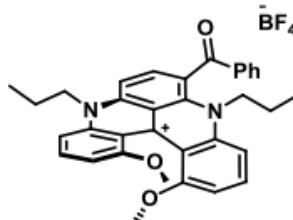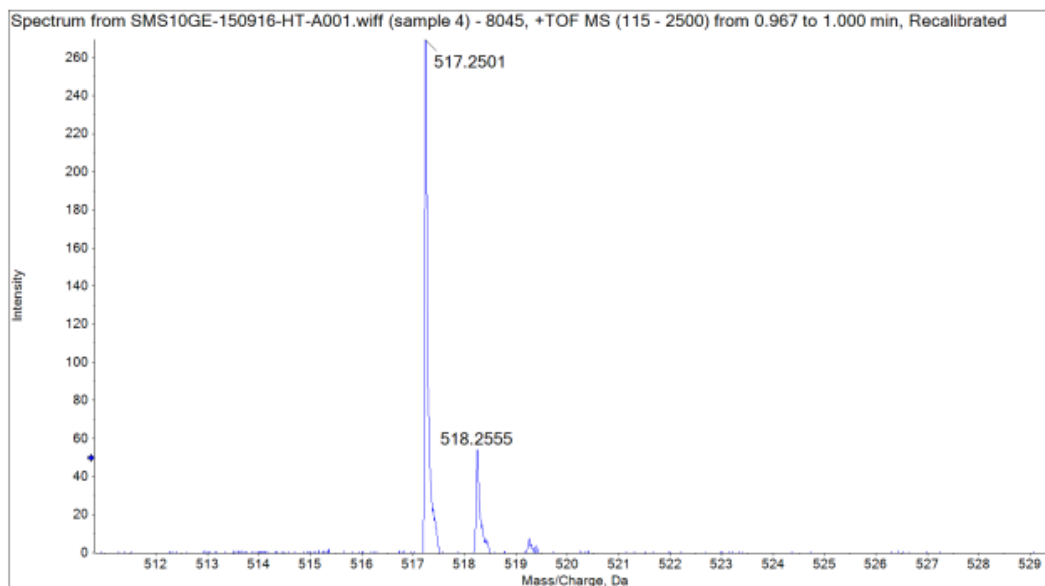

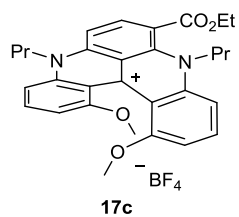

**<sup>1</sup>H NMR (500 MHz, CD<sub>2</sub>Cl<sub>2</sub>)**

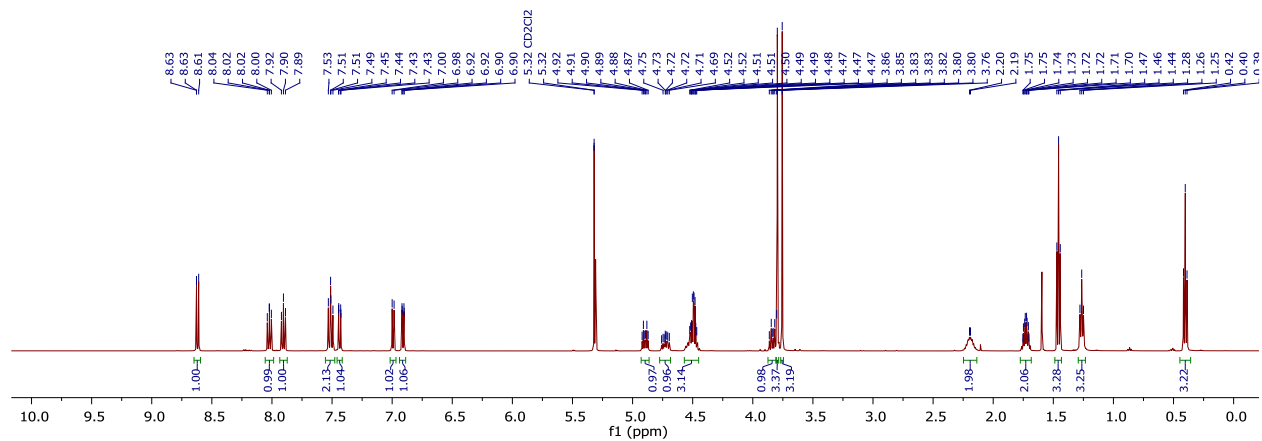

**<sup>13</sup>C NMR (125 MHz, CD<sub>2</sub>Cl<sub>2</sub>)**

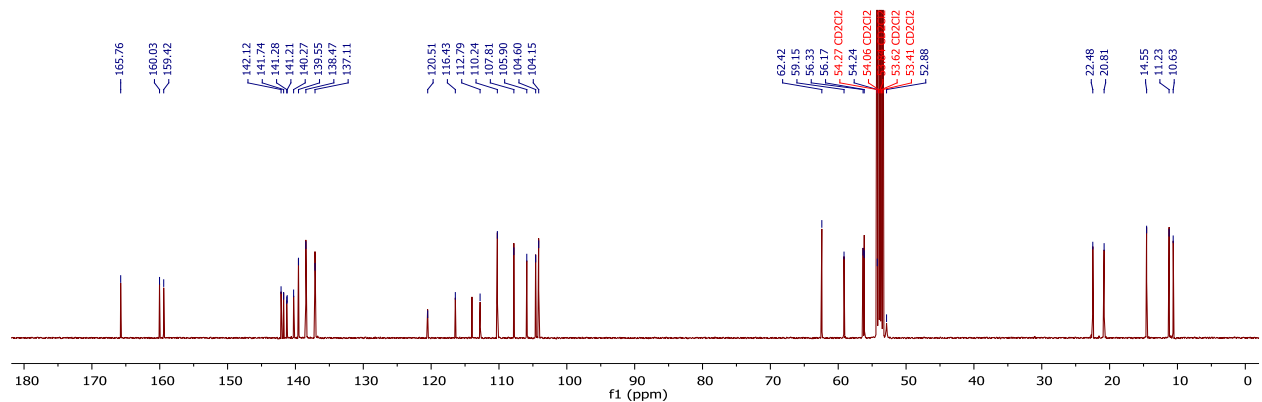

**<sup>19</sup>F NMR (282 MHz, CD<sub>2</sub>Cl<sub>2</sub>)**

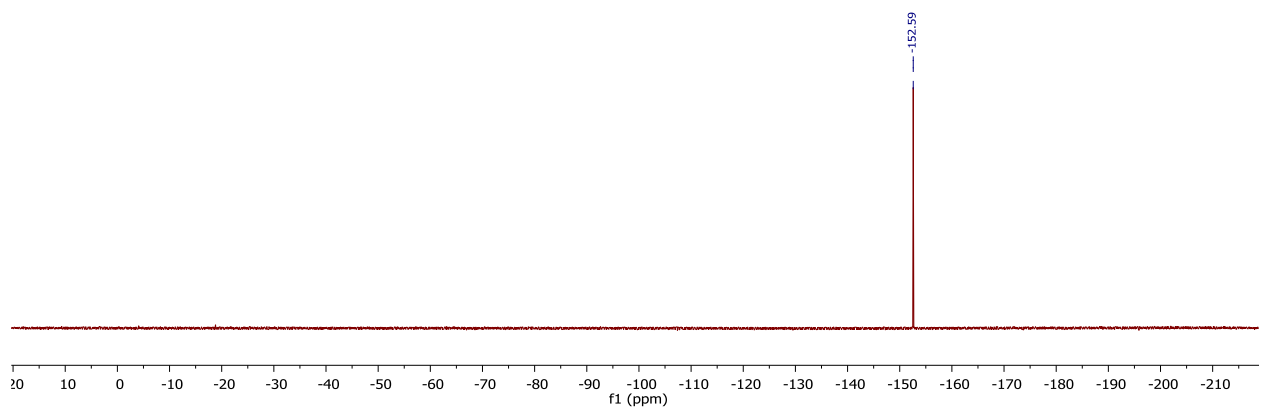

# UNIVERSITY OF GENEVA

Faculty of Sciences

Sciences Mass Spectrometry

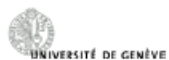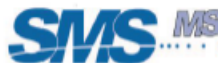

|                         |                     |                      |                             |
|-------------------------|---------------------|----------------------|-----------------------------|
| Submitter:              | PASCAL              | Date of reception:   | 13/02/15                    |
| Sample name:            | SPA041              | Date of certificate: | 17/02/15                    |
| Sample number:          | 7692                | Data filename:       | SMS10GE-150216-ES-A002      |
| Operator:               | Eliane Sandmeier    | Instrument:          | QSTAR Pulsar (AB/MDS Sciex) |
| Principal investigator: | Dr. Sophie Michalet | Ionisation mode:     | ESI (positive mode)         |

| Expected Formula     | Observed $m/z$ [ $M$ ] <sup>+</sup> | Expected $m/z$ (amu) | Accuracy (ppm) |
|----------------------|-------------------------------------|----------------------|----------------|
| $C_{30}H_{33}N_2O_4$ | 485.2437                            | 485.2435             | 0.5            |

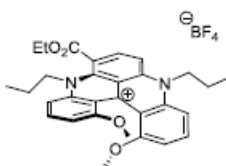

**SPA041**

Chemical Formula:  $C_{30}H_{33}N_2O_4^+$

Exact Mass: 485.2435

Molecular Weight: 485.5935

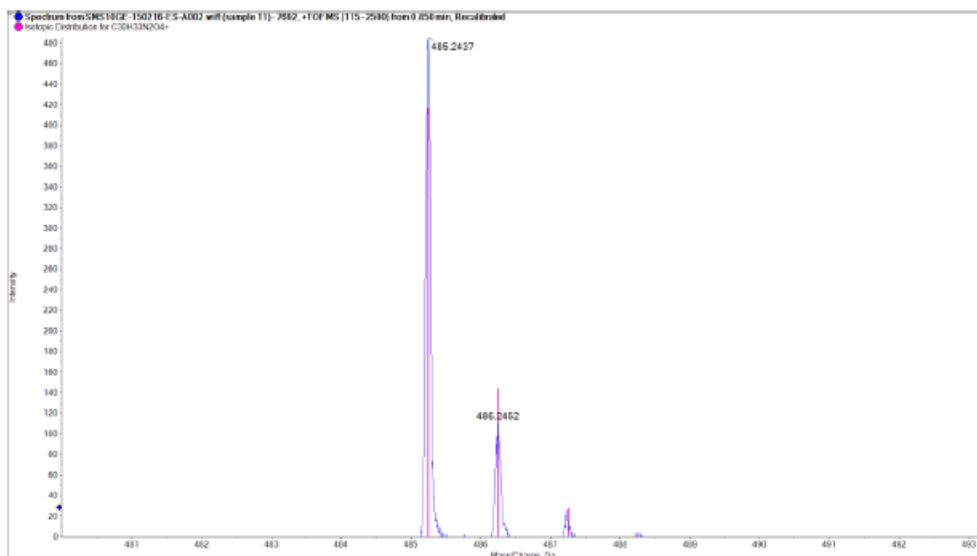

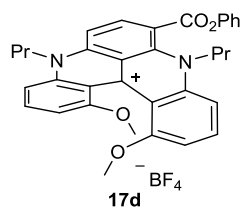

**<sup>1</sup>H NMR (500 MHz, CD<sub>2</sub>Cl<sub>2</sub>)**

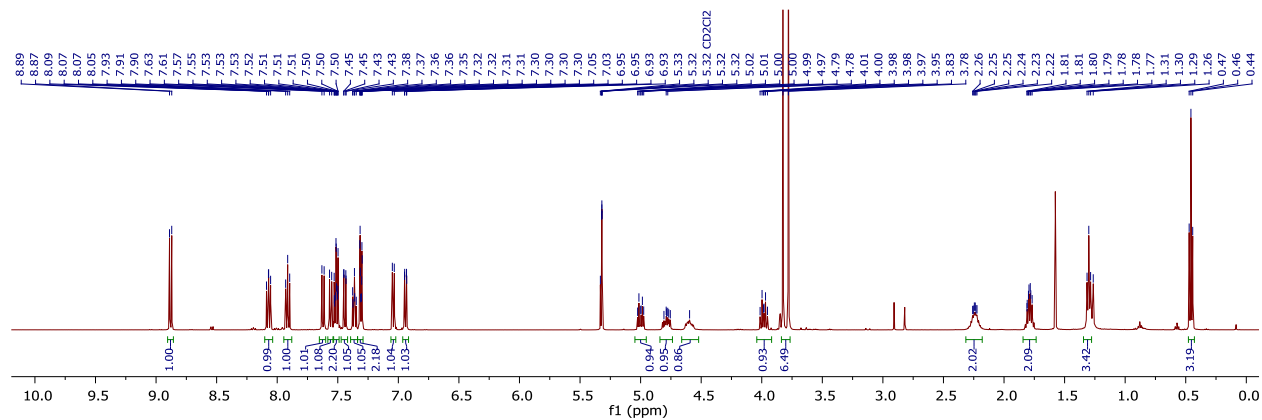

**<sup>13</sup>C NMR (125 MHz, CD<sub>2</sub>Cl<sub>2</sub>)**

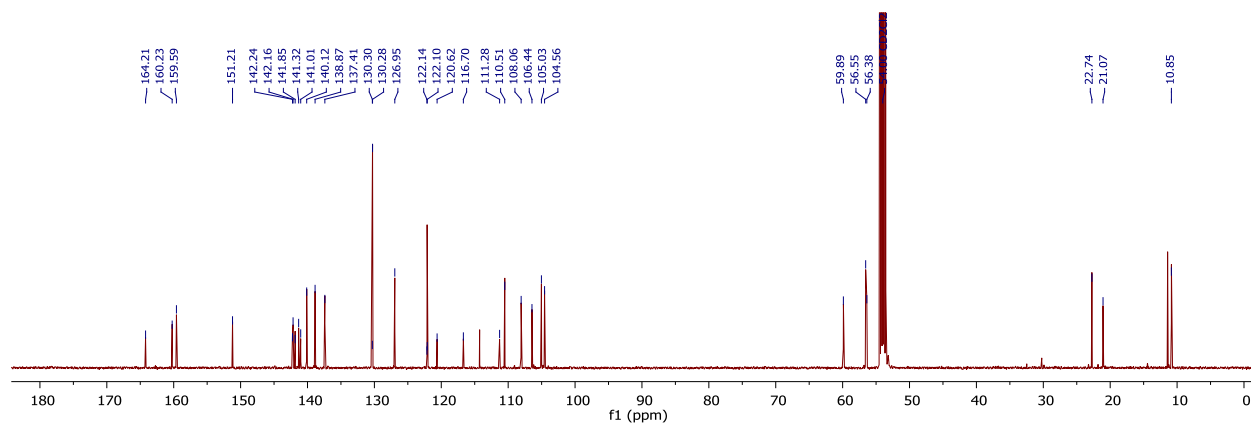

**<sup>19</sup>F NMR (282 MHz, CD<sub>2</sub>Cl<sub>2</sub>)**

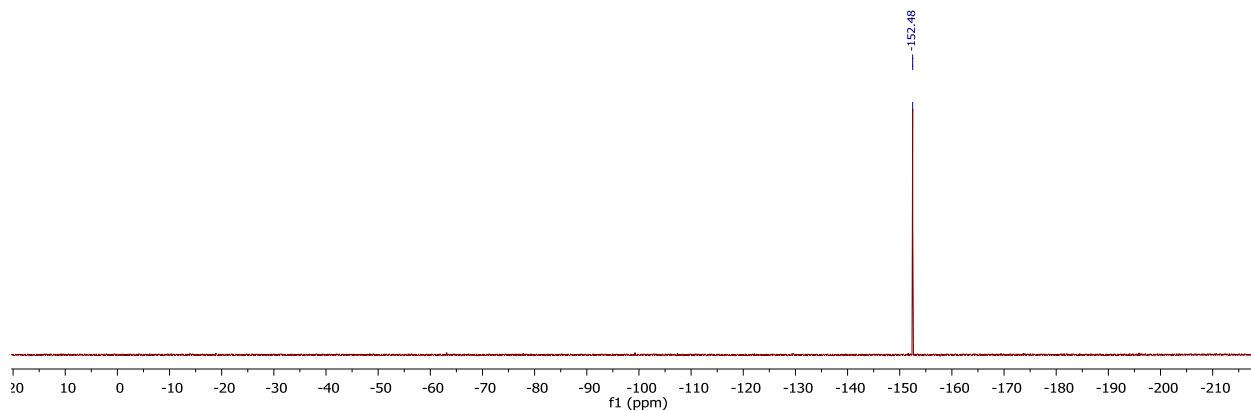

# UNIVERSITY OF GENEVA

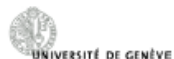

Faculty of Sciences

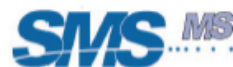

Sciences Mass Spectrometry

|                         |                     |                      |                             |
|-------------------------|---------------------|----------------------|-----------------------------|
| Submitter:              | PASCAL              | Date of reception:   | 24/03/15                    |
| Sample name:            | SPA045              | Date of certificate: | 08/04/15                    |
| Sample number:          | 7752                | Data filename:       | SMS10GE-150407-ES-A001      |
| Operator:               | Eliane Sandmeier    | Instrument:          | QSTAR Pulsar (AB/MDS Sciex) |
| Principal investigator: | Dr. Sophie Michalet | Ionisation mode:     | ESI (positive mode)         |

| Expected Formula                                              | Observed $m/z$ [M] <sup>+</sup> | Expected $m/z$ (amu) | Accuracy (ppm) |
|---------------------------------------------------------------|---------------------------------|----------------------|----------------|
| C <sub>34</sub> H <sub>33</sub> N <sub>2</sub> O <sub>4</sub> | 533.2436                        | 533.2435             | 0.2            |

**SPA045**  
 Chemical Formula: C<sub>34</sub>H<sub>33</sub>N<sub>2</sub>O<sub>4</sub><sup>+</sup>  
 Exact Mass: 533.2435  
 Molecular Weight: 533.6363

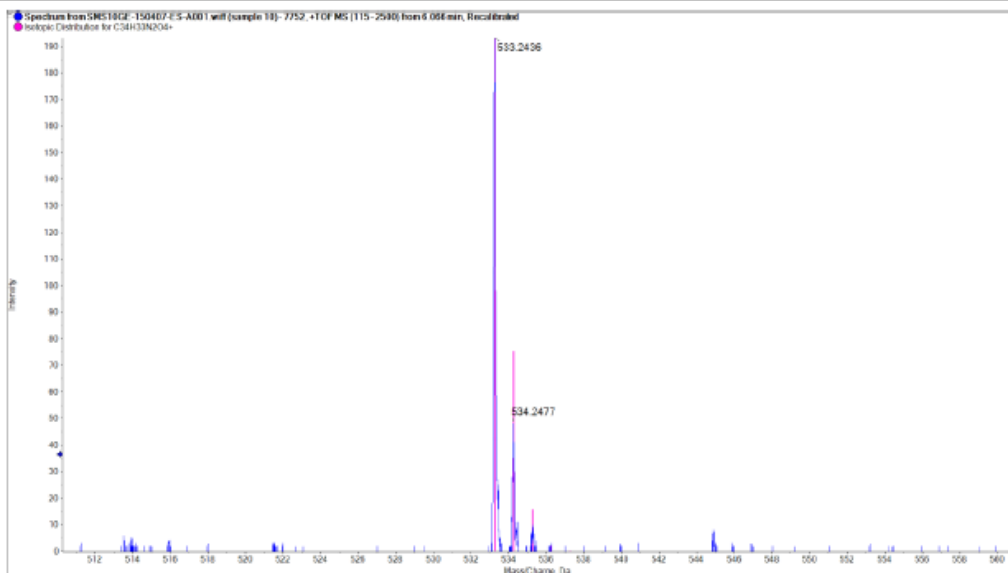

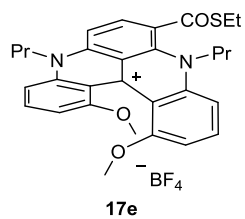

**<sup>1</sup>H NMR (500 MHz, CD<sub>2</sub>Cl<sub>2</sub>)**

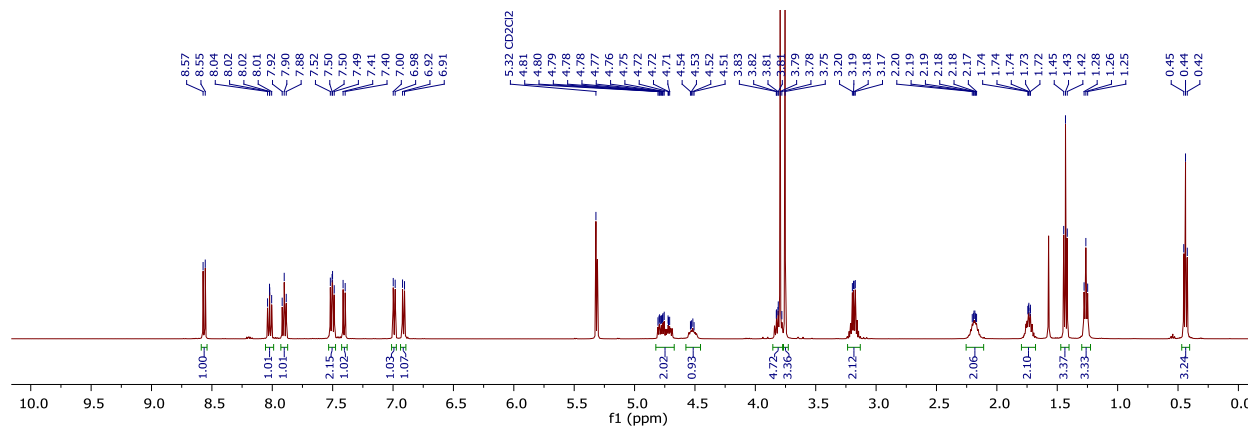

**<sup>13</sup>C NMR (125 MHz, CD<sub>2</sub>Cl<sub>2</sub>)**

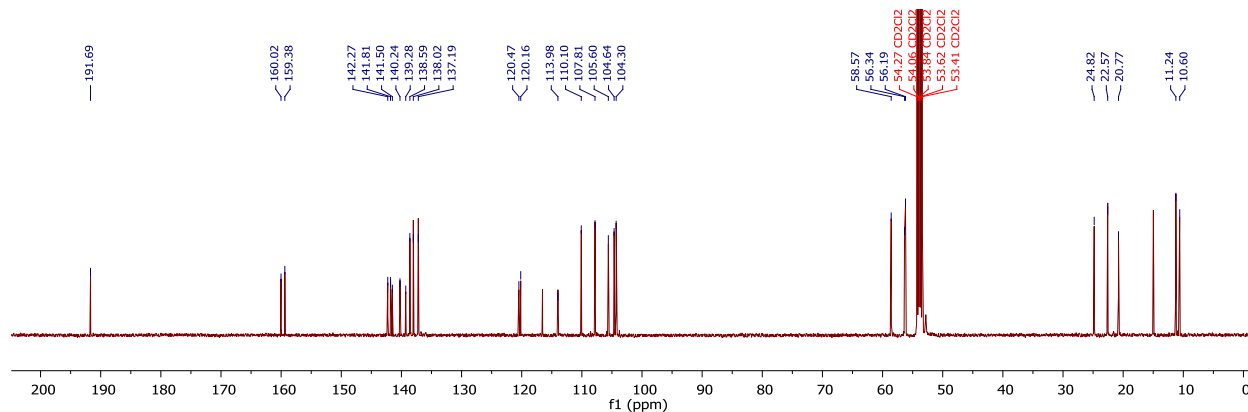

**<sup>19</sup>F NMR (282 MHz, CD<sub>2</sub>Cl<sub>2</sub>)**

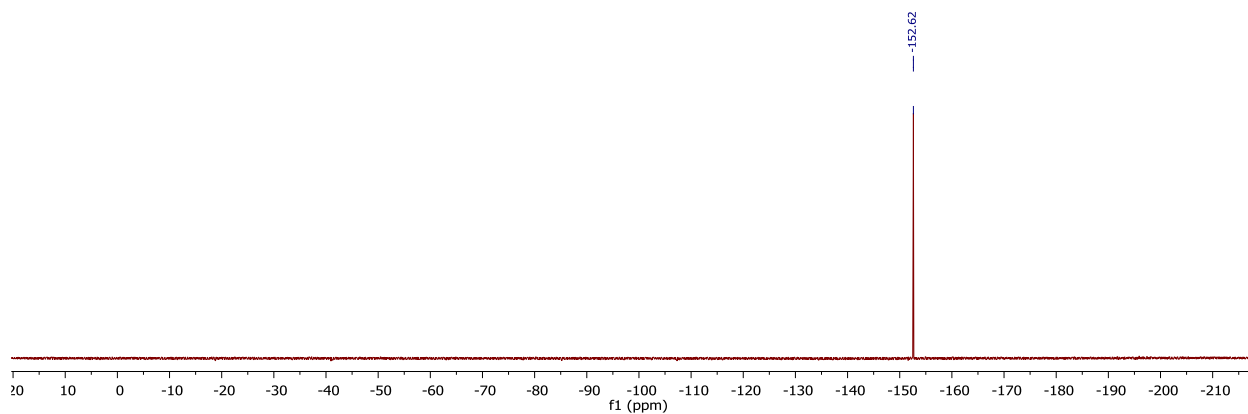

# UNIVERSITY OF GENEVA

Faculty of Sciences

Sciences Mass Spectrometry

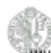

UNIVERSITÉ DE GENÈVE

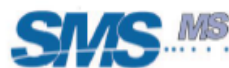

|                                             |                                         |
|---------------------------------------------|-----------------------------------------|
| Submitter: PASCAL                           | Date of reception: 26/03/15             |
| Sample name: SPA065                         | Date of certificate: 02/04/15           |
| Sample number: 7759                         | Data filename: SMS03GE-150401-ES-A002   |
| Operator: Eliane Sandmeier                  | Instrument: QSTAR Pulsar (AB/MDS Sciex) |
| Principal investigator: Dr. Sophie Michalet | Ionisation mode: ESI (positive mode)    |

| Expected Formula                                                | Observed $m/z$ [ $M$ ] <sup>+</sup> | Expected $m/z$ (amu) | Accuracy (ppm) |
|-----------------------------------------------------------------|-------------------------------------|----------------------|----------------|
| C <sub>30</sub> H <sub>33</sub> N <sub>2</sub> O <sub>3</sub> S | 501.2217                            | 501.2207             | 2.2            |

**SPA065**  
 Chemical Formula: C<sub>30</sub>H<sub>33</sub>N<sub>2</sub>O<sub>3</sub>S<sup>+</sup>  
 Exact Mass: 501.2206  
 Molecular Weight: 501.6591

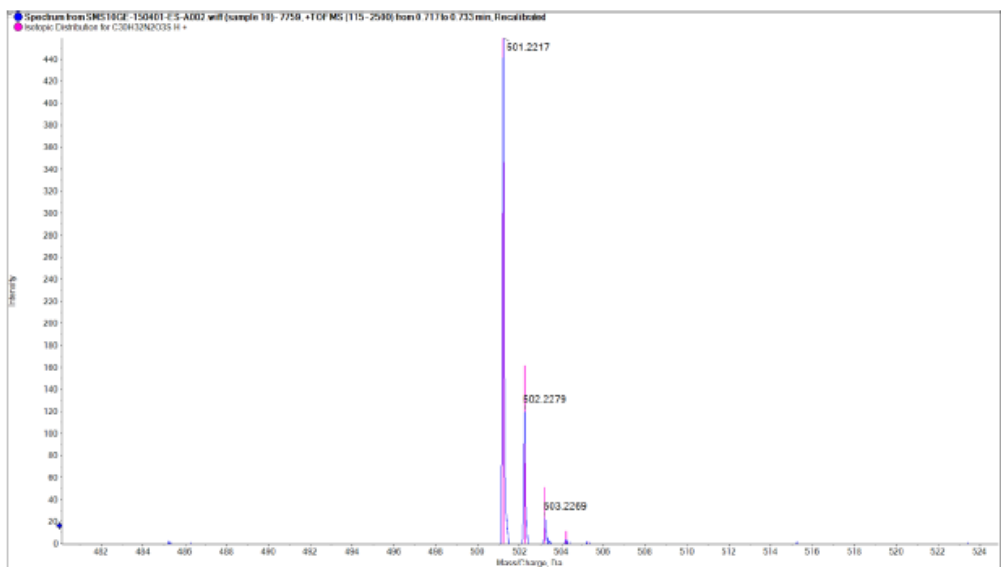



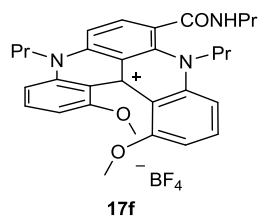

**<sup>1</sup>H NMR (500 MHz, CD<sub>2</sub>Cl<sub>2</sub>)**

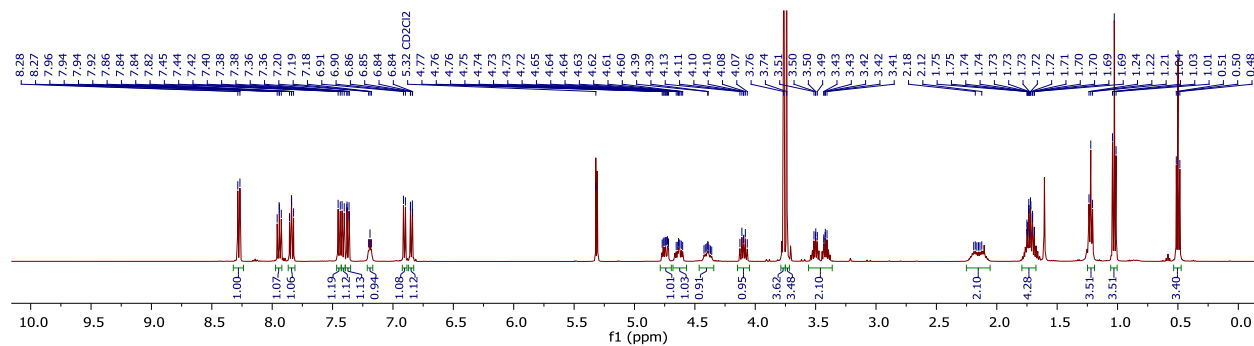

**<sup>13</sup>C NMR (125 MHz, CD<sub>2</sub>Cl<sub>2</sub>)**

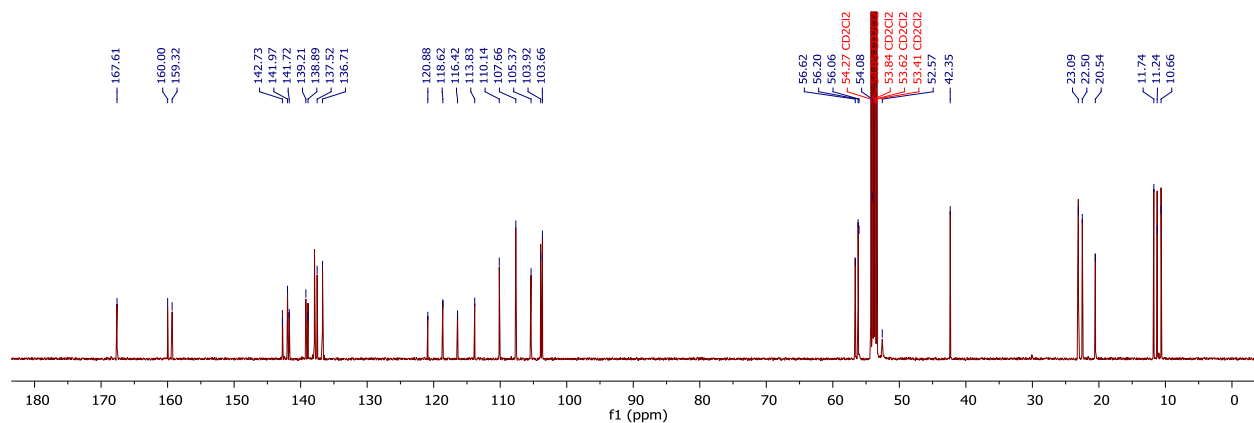

**<sup>19</sup>F NMR (282 MHz, CD<sub>2</sub>Cl<sub>2</sub>)**

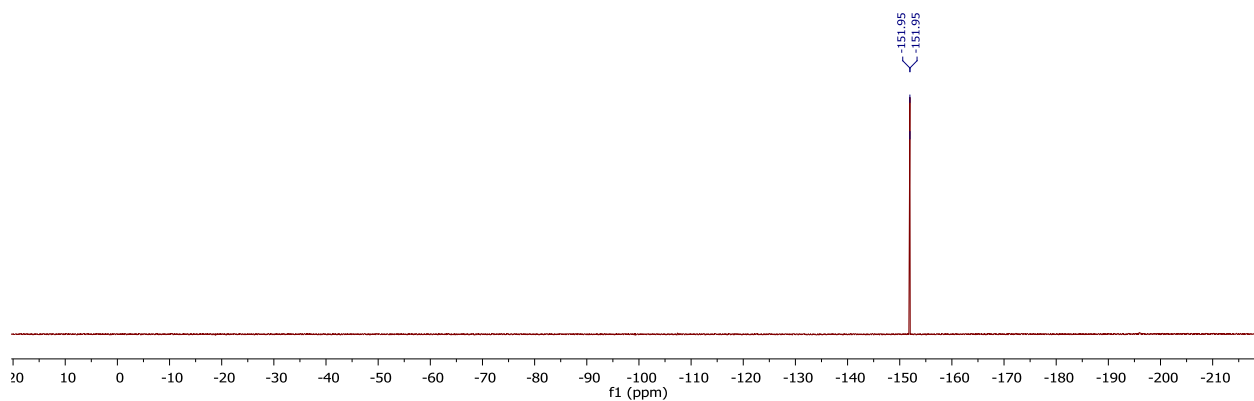

# UNIVERSITY OF GENEVA

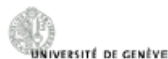

Faculty of Sciences

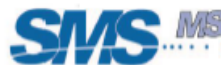

Sciences Mass Spectrometry

|                         |                     |                      |                             |
|-------------------------|---------------------|----------------------|-----------------------------|
| Submitter:              | PASCAL              | Date of reception:   | 24/03/15                    |
| Sample name:            | SPA062              | Date of certificate: | 01/04/15                    |
| Sample number:          | 7755                | Data filename:       | SMS03GE-150331-ES-A001      |
| Operator:               | Eliane Sandmeier    | Instrument:          | QSTAR Pulsar (AB/MDS Sciex) |
| Principal investigator: | Dr. Sophie Michalet | Ionisation mode:     | ESI (positive mode)         |

| Expected Formula                                              | Observed $m/z$ [M] <sup>+</sup> | Expected $m/z$ (amu) | Accuracy (ppm) |
|---------------------------------------------------------------|---------------------------------|----------------------|----------------|
| C <sub>31</sub> H <sub>38</sub> N <sub>3</sub> O <sub>3</sub> | 498.2752                        | 498.2751             | 0.2            |

**SPA062**  
 Chemical Formula: C<sub>31</sub>H<sub>38</sub>N<sub>3</sub>O<sub>3</sub><sup>+</sup>  
 Exact Mass: 498.2751  
 Molecular Weight: 498.6353

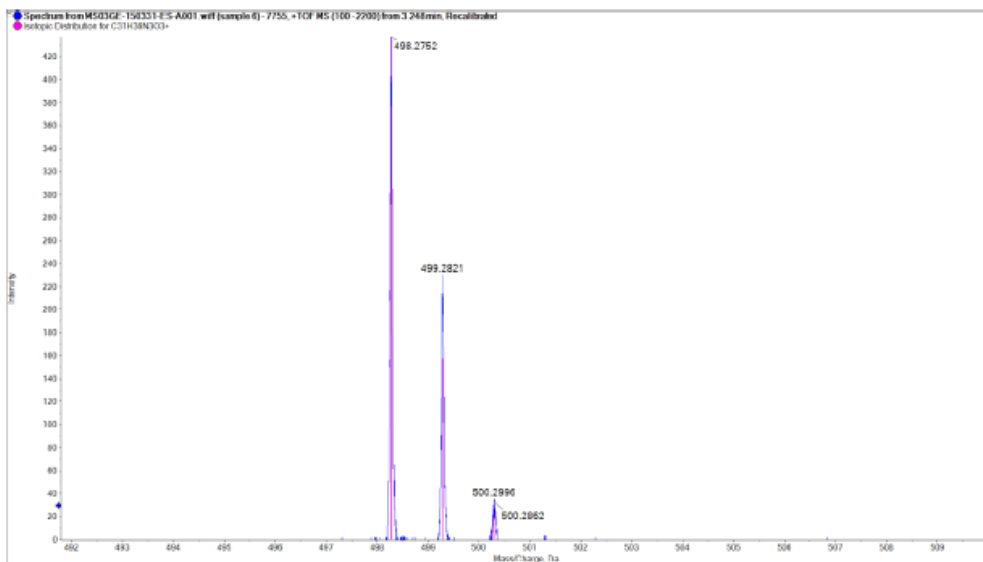

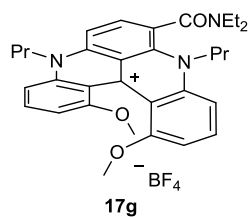

<sup>1</sup>H NMR (DMSO-d<sub>6</sub>, 368 K, 400 MHz)

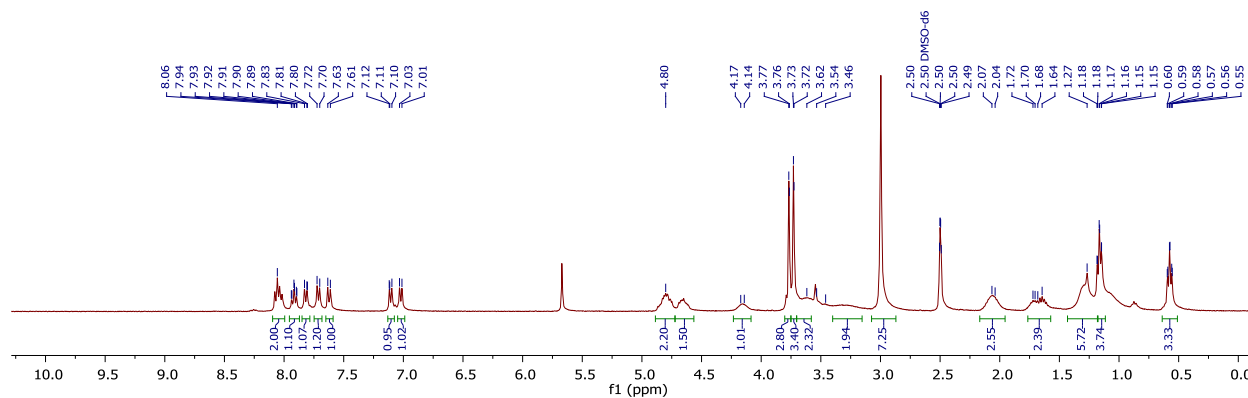

<sup>13</sup>C NMR (DMSO-d<sub>6</sub>, 343 K, 125 MHz)

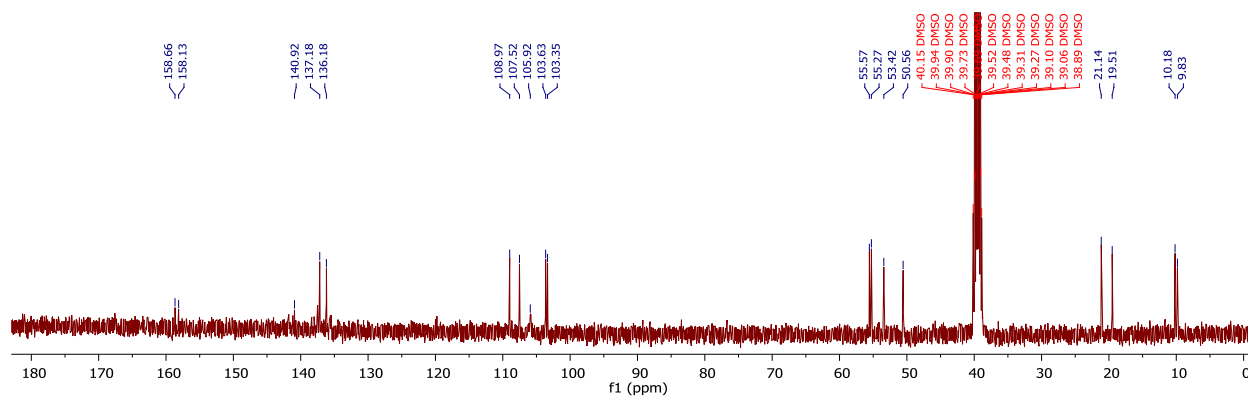

<sup>19</sup>F NMR (282 MHz, DMSO-d<sub>6</sub>)

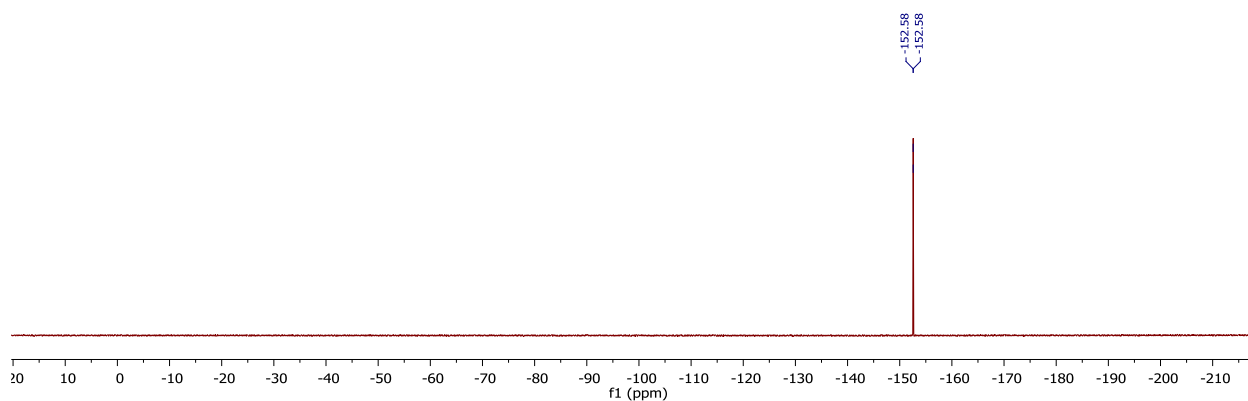

# <sup>1</sup>H NMR (DMSO-d<sub>6</sub>, variable temperature, 400 MHz)

SPA064-6-CHIAM 400MHz DMSO HT.5.fid  
1H spectrum  
Sample: SPA064-6  
Simon Pascal  
Solvent: DMSO-d6  
T=368K  
04.06.2015  
M. Pupier 3

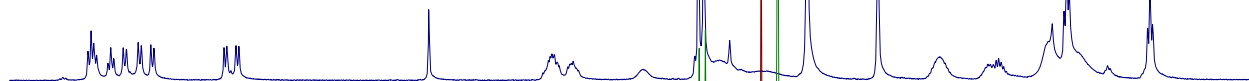

SPA064-6-CHIAM 400MHz DMSO HT.2.fid  
1H spectrum  
Sample: SPA064-6  
Simon Pascal  
Solvent: DMSO-d6  
T=323K  
04.06.2015  
M. Pupier 2

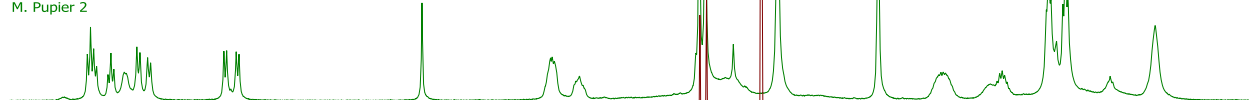

SPA064-6-CHIAM 400MHz DMSO HT.1.fid  
1H spectrum  
Sample: SPA064-6  
Simon Pascal  
Solvent: DMSO-d6  
T=298K  
04.06.2015  
M. Pupier 1

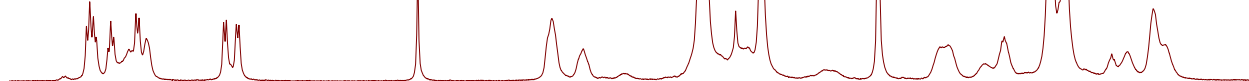

8.5 8.0 7.5 7.0 6.5 6.0 5.5 5.0 4.5 4.0 3.5 3.0 2.5 2.0 1.5 1.0 0.5 0.0  
f1 (ppm)

## 4. X-ray diffraction

Details for the refinement for each structure can be found below with, for each structure, a representation of the cation and of the content of the asymmetric units shown as displacement ellipsoids drawn at 50 percent probability. For disordered structures, comments on the modelling of the disorder are included in this table. More detailed information can be found in the deposited cif files which can be obtained free of charge at the CCDC. For all structure, a view of the packing is included showing that the molecules are forming stacks along the small unit-cell axis. The distances between adjacent molecules is between 3.8 and 4.2 Å. However, adjacent molecules are most of the time shifted, not allowing good  $\pi$ - $\pi$  overlap.

Table S 1. Relevant crystallographic data.

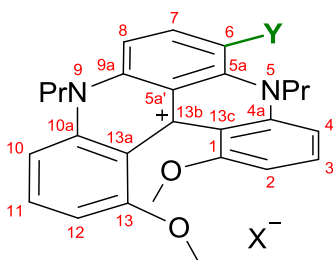

| Molecule   | Functional group (Y) | Helical pitch / Å | Helical angle / ° | $\Phi_{C(13)-C(13a)-C(13b)-C(13c)}$ / ° | $\Phi_{C(13a)-C(13b)-C(13c)-C(1)}$ / ° |
|------------|----------------------|-------------------|-------------------|-----------------------------------------|----------------------------------------|
| <b>1</b>   | H                    | 3.19              | 41.1              | 27.4                                    | 27.4                                   |
| <b>5</b>   | NO <sub>2</sub>      | 3.22              | 41.2              | 25.8                                    | 27.7                                   |
| <b>6</b>   | CHO                  | 3.26              | 45.9              | 28.2                                    | 29.1                                   |
| <b>7</b>   | NH <sub>2</sub>      | 3.19              | 39.8              | 25.4                                    | 27.7                                   |
| <b>14</b>  | OH                   | 3.18              | 39.3              | 23.2                                    | 29.5                                   |
| <b>15</b>  | OMe                  | 3.18              | 39.2              | 25.2                                    | 27.0                                   |
| <b>17c</b> | CO <sub>2</sub> Et   | 3.24              | 42.0              | 26.1                                    | 27.7                                   |
| <b>17e</b> | COSEt                | 3.25              | 42.0              | 26.8                                    | 26.9                                   |
| <b>17f</b> | CONHPr               | 3.22              | 42.4              | 24.8                                    | 30.7                                   |
| <b>17g</b> | CONEt <sub>2</sub>   | 3.23              | 43.4              | 26.9                                    | 28.6                                   |

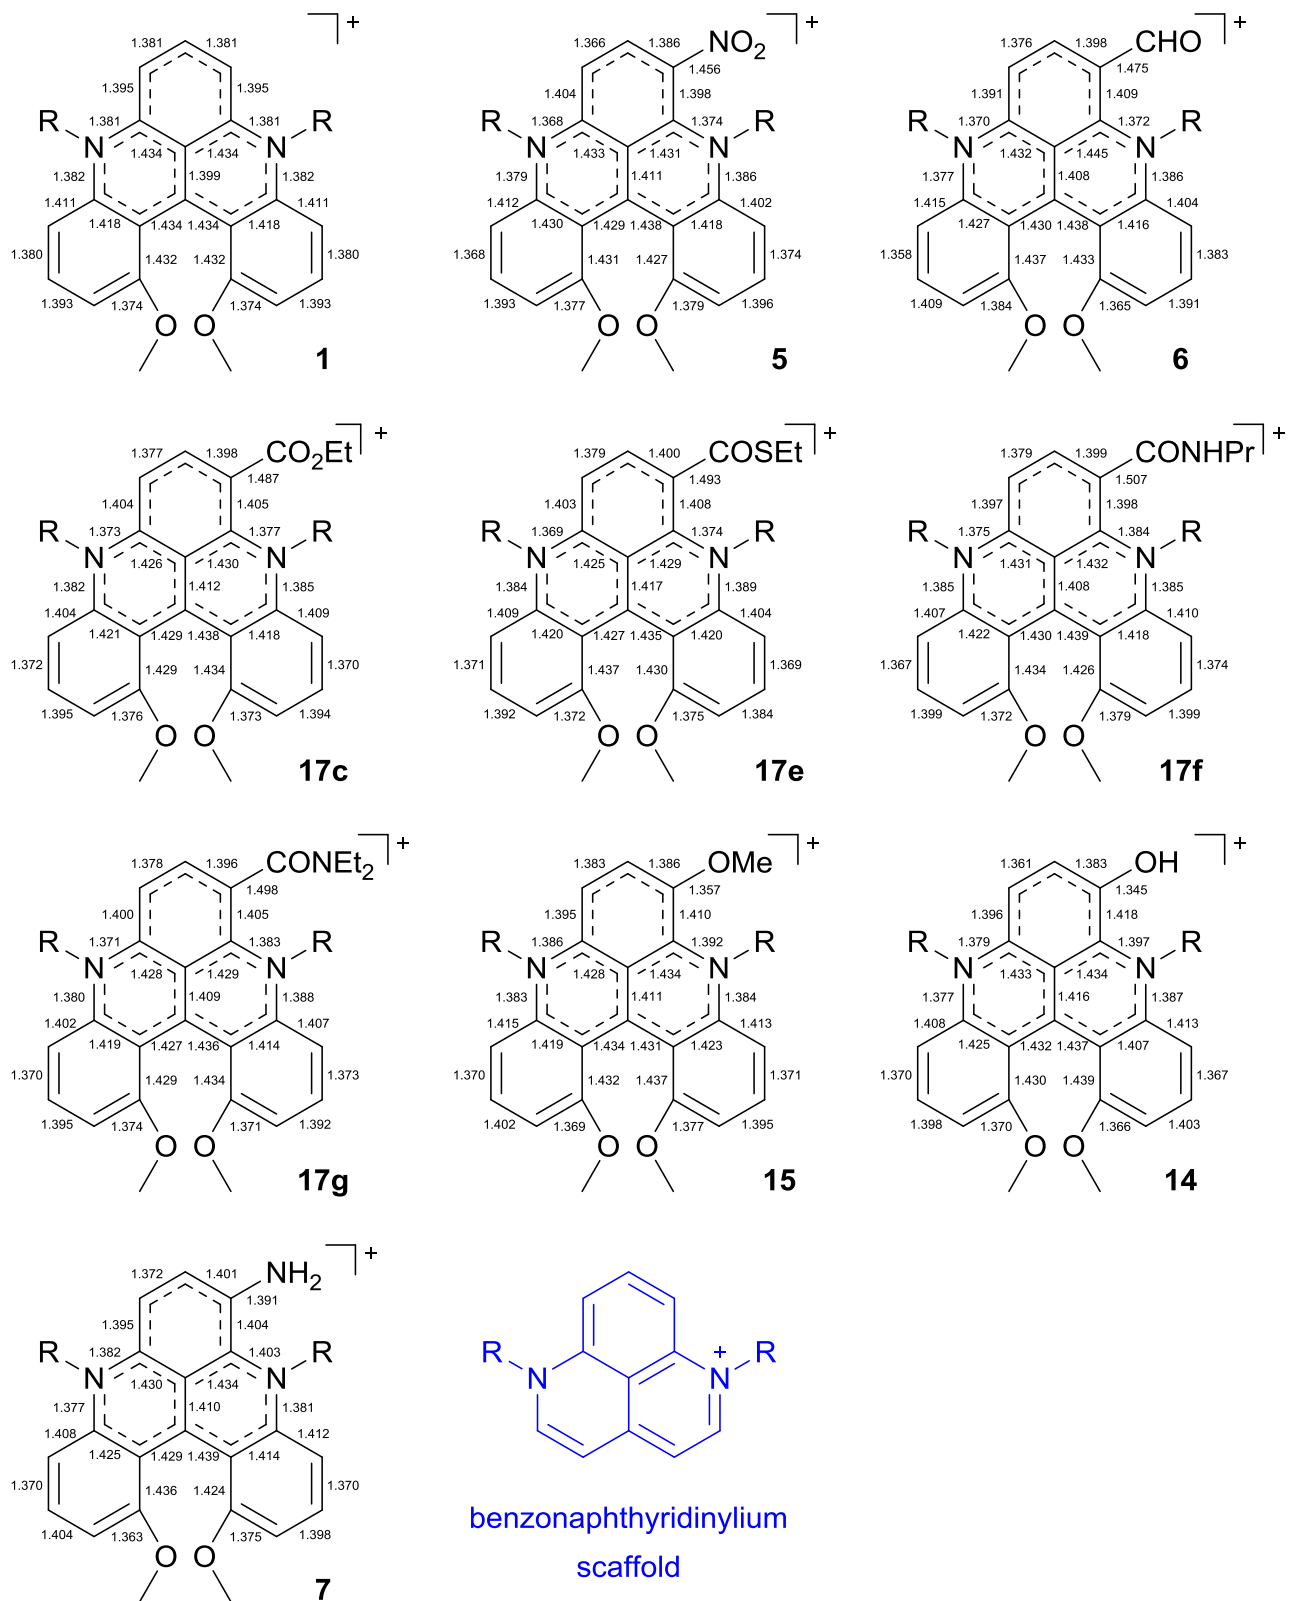

Figure S 1. Bond lengths (Å) extracted from X-ray analysis.

## Compound 1 (Y=H)

|                              |                          |
|------------------------------|--------------------------|
| CCDC                         | 1443641                  |
| Formula                      | $C_{27}H_{29}BF_4N_2O_2$ |
| $D_{calc.}/g\text{ cm}^{-3}$ | 1.342                    |
| $\mu/\text{mm}^{-1}$         | 0.878                    |
| Formula Weight               | 500.33                   |
| Colour                       | brown                    |
| Shape                        | prism                    |
| Max Size/mm                  | 0.57                     |
| Mid Size/mm                  | 0.16                     |
| Min Size/mm                  | 0.08                     |
| $T/K$                        | 180(2)                   |
| Crystal System               | monoclinic               |
| Space Group                  | I2/a                     |
| $a/\text{\AA}$               | 10.0250(5)               |
| $b/\text{\AA}$               | 19.7722(8)               |
| $c/\text{\AA}$               | 12.5456(6)               |
| $\alpha^\circ$               | 90.00                    |
| $\beta^\circ$                | 95.411(4)                |
| $\gamma^\circ$               | 90.00                    |
| $V/\text{\AA}^3$             | 2475.66(19)              |
| $Z$                          | 4                        |
| $Z'$                         | 0.5                      |
| $\theta_{min}^\circ$         | 4.19                     |
| $\theta_{max}^\circ$         | 73.63                    |
| Measured Refl.               | 9790                     |
| Independent Refl.            | 2475                     |
| Reflections Used             | 2079                     |
| $R_{int}$                    | 0.0286                   |
| Parameters                   | 174                      |
| Restraints                   | 0                        |
| Largest Peak                 | 0.494                    |
| Deepest Hole                 | -0.267                   |
| GooF                         | 1.067                    |
| $wR_2$ (all data)            | 0.1905                   |
| $wR_2$                       | 0.1794                   |
| $R_1$ (all data)             | 0.0705                   |
| $R_1$                        | 0.0621                   |

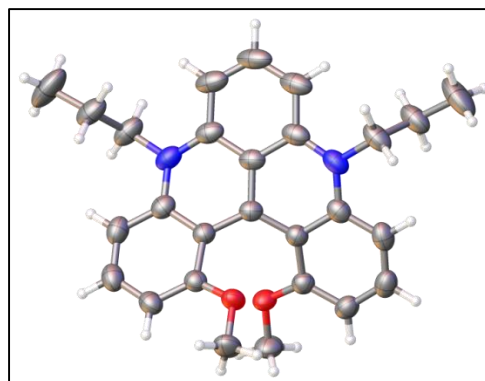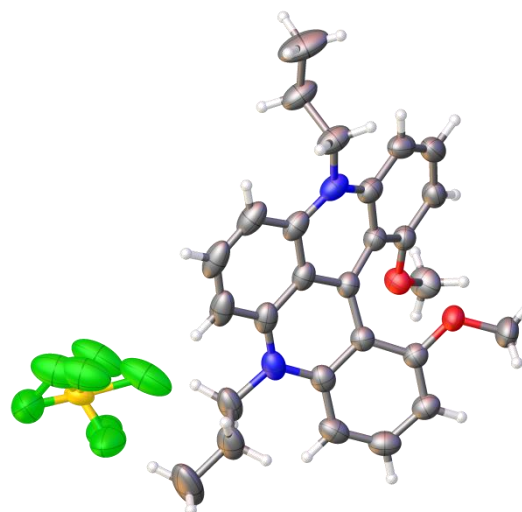

View of the asymmetric unit. (Displacement parameters are drawn at 50 percent probability.)

View along the a axis.

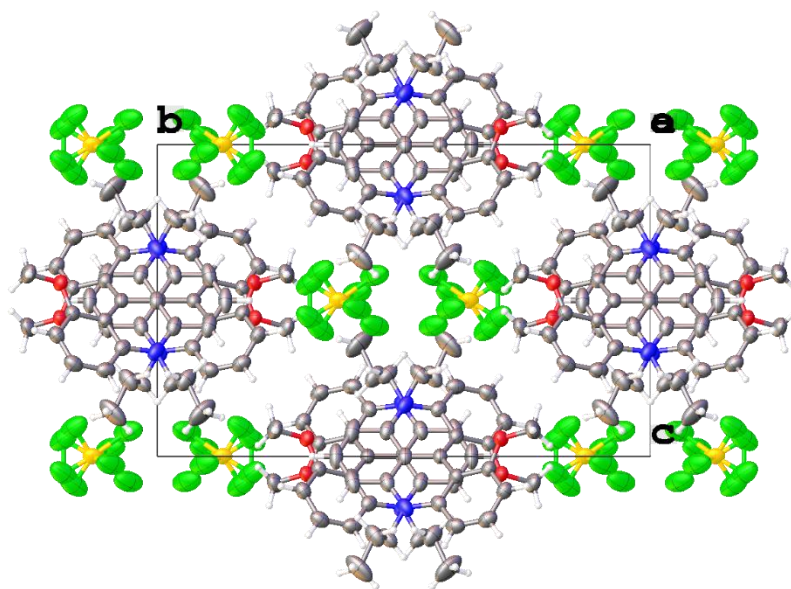

## Compound 5 (Y=NO<sub>2</sub>)

|                              |                                                                |
|------------------------------|----------------------------------------------------------------|
| CCDC                         | 1470066                                                        |
| Formula                      | C <sub>27</sub> H <sub>29</sub> N <sub>5</sub> O <sub>10</sub> |
| $D_{calc.}/g\text{ cm}^{-3}$ | 1.420                                                          |
| $\mu/\text{mm}^{-1}$         | 0.930                                                          |
| Formula Weight               | 500.33                                                         |
| Colour                       | orange                                                         |
| Shape                        | block                                                          |
| Max Size/mm                  | 0.4757                                                         |
| Mid Size/mm                  | 0.3328                                                         |
| Min Size/mm                  | 0.1608                                                         |
| $T/K$                        | 180(2)                                                         |
| Crystal System               | triclinic                                                      |
| Space Group                  | P-1                                                            |
| $a/\text{\AA}$               | 11.8159(7)                                                     |
| $b/\text{\AA}$               | 14.3381(7)                                                     |
| $c/\text{\AA}$               | 17.9959(9)                                                     |
| $\alpha^\circ$               | 78.648(4)                                                      |
| $\beta^\circ$                | 84.294(4)                                                      |
| $\gamma^\circ$               | 66.016(5)                                                      |
| $V/\text{\AA}^3$             | 2730.4(3)                                                      |
| $Z$                          | 4                                                              |
| $Z'$                         | 2                                                              |
| $\theta_{min}^\circ$         | 6.85                                                           |
| $\theta_{max}^\circ$         | 147.69                                                         |
| Measured Refl.               | 42101                                                          |
| Independent Refl.            | 10854                                                          |
| Reflections Used             | 10854                                                          |
| $R_{int}$                    | 0.0260                                                         |
| Parameters                   | 773                                                            |
| Restraints                   | 2                                                              |
| Largest Peak                 | 0.53                                                           |
| Deepest Hole                 | -0.31                                                          |
| GooF                         | 1.052                                                          |
| $wR_2$ (all data)            | 0.1227                                                         |
| $wR_2$                       | 0.1164                                                         |
| $R_1$ (all data)             | 0.0466                                                         |
| $R_1$                        | 0.0407                                                         |

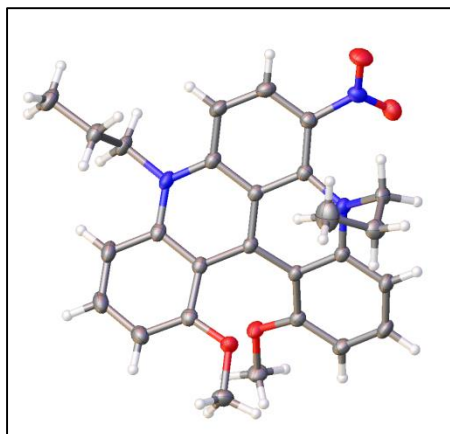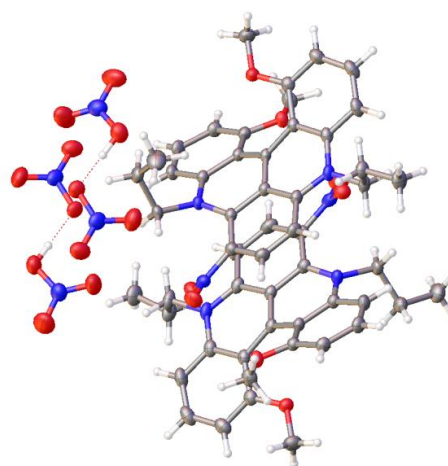

View of the asymmetric unit. (Displacement parameters are drawn at 50 percent probability.)

View along the [-1,1,-1] direction

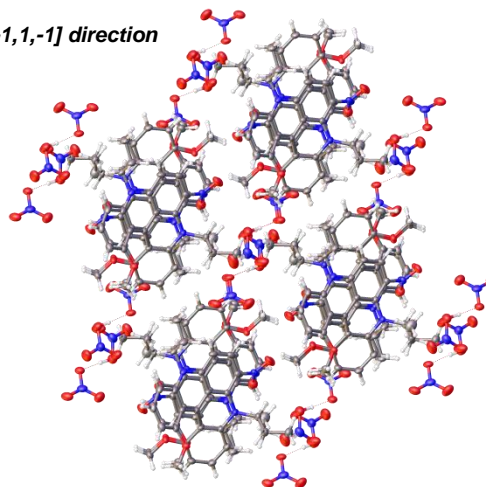

There are two cations in the asymmetric unit that are almost superimposable apart from the positions of the atom C30. H atoms on HNO<sub>3</sub> groups were placed using difference Fourier map and geometrical considerations. They were refined using DFIX restraints.



## Compound 6 (Y=CHO)

|                              |                                                                               |
|------------------------------|-------------------------------------------------------------------------------|
| CCDC                         | 1443633                                                                       |
| Formula                      | C <sub>28</sub> H <sub>29</sub> BF <sub>4</sub> N <sub>2</sub> O <sub>3</sub> |
| $D_{calc.}/\text{g cm}^{-3}$ | 1.384                                                                         |
| $\mu/\text{mm}^{-1}$         | 0.919                                                                         |
| Formula Weight               | 528.34                                                                        |
| Colour                       | dark red                                                                      |
| Shape                        | plate                                                                         |
| Max Size/mm                  | 0.43                                                                          |
| Mid Size/mm                  | 0.13                                                                          |
| Min Size/mm                  | 0.07                                                                          |
| $T/\text{K}$                 | 180.00(14)                                                                    |
| Crystal System               | orthorhombic                                                                  |
| Space Group                  | Pn2 <sub>1</sub> a                                                            |
| $a/\text{\AA}$               | 22.69881(19)                                                                  |
| $b/\text{\AA}$               | 21.08434(17)                                                                  |
| $c/\text{\AA}$               | 10.59460(9)                                                                   |
| $\alpha^\circ$               | 90                                                                            |
| $\beta^\circ$                | 90                                                                            |
| $\gamma^\circ$               | 90                                                                            |
| $V/\text{\AA}^3$             | 5070.46(7)                                                                    |
| $Z$                          | 8                                                                             |
| $Z'$                         | 2                                                                             |
| $\theta_{min}^\circ$         | 3.895                                                                         |
| $\theta_{max}^\circ$         | 73.413                                                                        |
| Measured Refl.               | 38343                                                                         |
| Independent Refl.            | 9318                                                                          |
| Reflections Used             | 8670                                                                          |
| $R_{int}$                    | 0.0313                                                                        |
| Parameters                   | 713                                                                           |
| Restraints                   | 84                                                                            |
| Largest Peak                 | 0.686                                                                         |
| Deepest Hole                 | -0.403                                                                        |
| Goof                         | 1.033                                                                         |
| $wR_2$ (all data)            | 0.1533                                                                        |
| $wR_2$                       | 0.1480                                                                        |
| $R_1$ (all data)             | 0.0546                                                                        |
| $R_1$                        | 0.0510                                                                        |

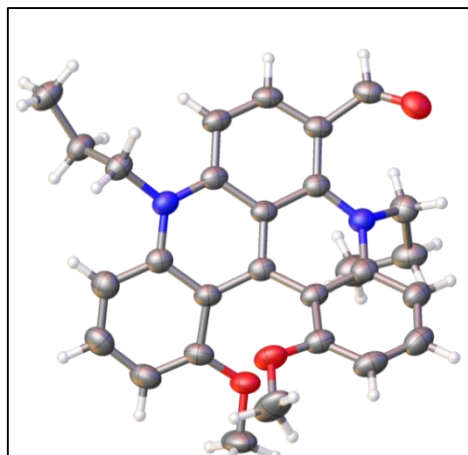

View of the asymmetric unit.  
(Displacement parameters are drawn at  
50 percent probability)

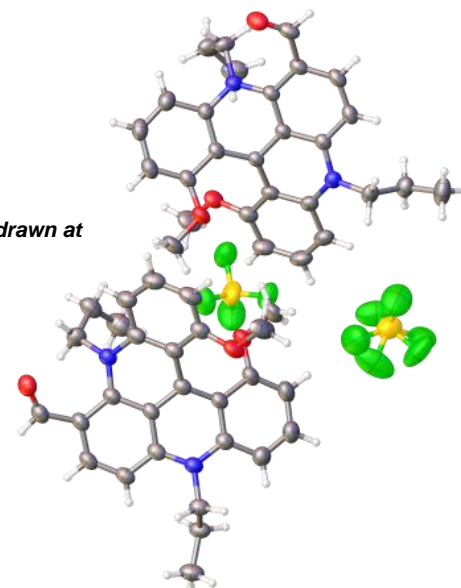

View along the a axis.

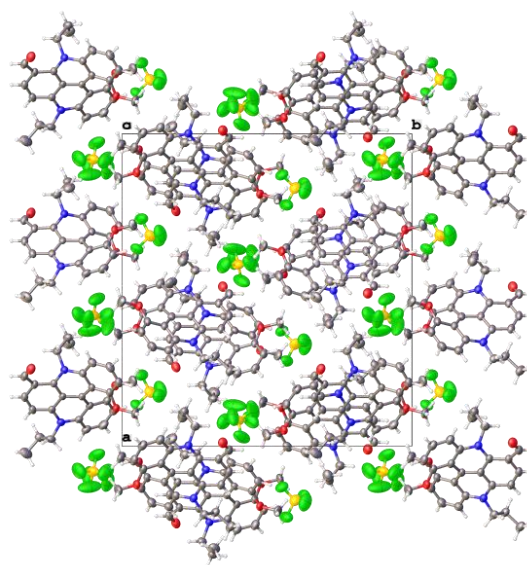

## Compound 7 (Y=NH<sub>2</sub>)

|                        |                                                                               |
|------------------------|-------------------------------------------------------------------------------|
| CCDC                   | 1443632                                                                       |
| Formula                | C <sub>27</sub> H <sub>30</sub> BF <sub>4</sub> N <sub>3</sub> O <sub>2</sub> |
| $D_{calc.}/g\ cm^{-3}$ | 1.412                                                                         |
| $\mu/mm^{-1}$          | 0.926                                                                         |
| Formula Weight         | 515.35                                                                        |
| Colour                 | green                                                                         |
| Shape                  | plate                                                                         |
| Max Size/mm            | 0.12                                                                          |
| Mid Size/mm            | 0.11                                                                          |
| Min Size/mm            | 0.01                                                                          |
| $T/K$                  | 180.00(14)                                                                    |
| Crystal System         | triclinic                                                                     |
| Space Group            | P-1                                                                           |
| $a/\text{\AA}$         | 7.8922(4)                                                                     |
| $b/\text{\AA}$         | 12.0779(7)                                                                    |
| $c/\text{\AA}$         | 13.8862(7)                                                                    |
| $\alpha^\circ$         | 67.020(5)                                                                     |
| $\beta^\circ$          | 84.303(4)                                                                     |
| $\gamma^\circ$         | 85.759(4)                                                                     |
| $V/\text{\AA}^3$       | 1211.69(12)                                                                   |
| $Z$                    | 2                                                                             |
| $Z'$                   | 1                                                                             |
| $\theta_{min}^\circ$   | 3.467                                                                         |
| $\theta_{max}^\circ$   | 73.395                                                                        |
| Measured Refl.         | 15168                                                                         |
| Independent Refl.      | 4747                                                                          |
| Reflections Used       | 3681                                                                          |
| $R_{int}$              | 0.0305                                                                        |
| Parameters             | 346                                                                           |
| Restraints             | 0                                                                             |
| Largest Peak           | 0.226                                                                         |
| Deepest Hole           | -0.258                                                                        |
| GooF                   | 0.960                                                                         |
| $wR_2$ (all data)      | 0.0977                                                                        |
| $wR_2$                 | 0.0904                                                                        |
| $R_1$ (all data)       | 0.0566                                                                        |

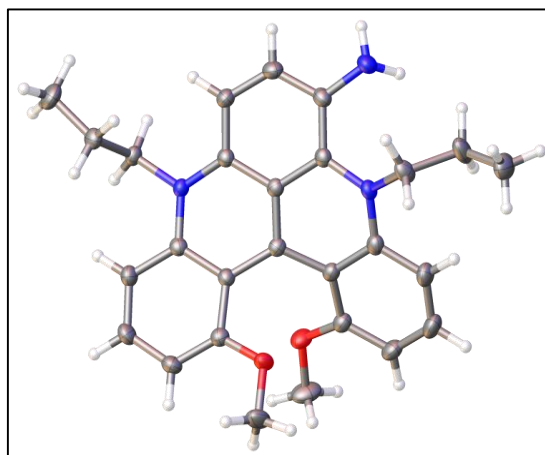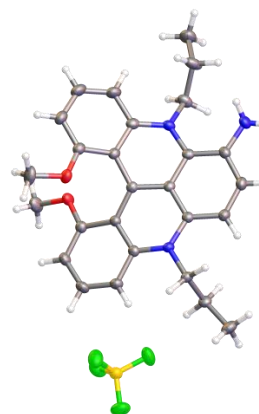

**View of the asymmetric unit. Displacement parameters are drawn at 50 percent probability.**

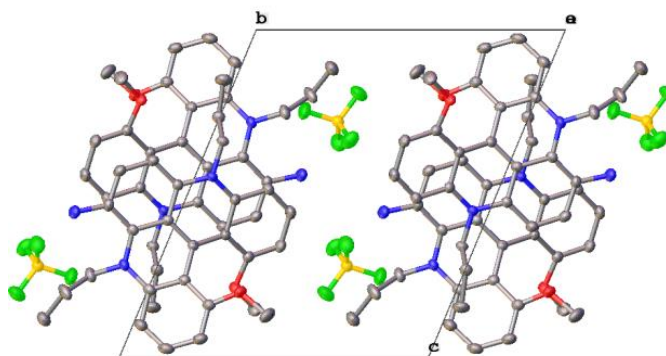

**Packing of the molecules** : The molecules forms stacks along the b axis.

## Compound 14 (Y=OH)

|                              |                        |
|------------------------------|------------------------|
| CCDC                         | 1443635                |
| Formula                      | $C_{27}H_{29}ClN_2O_3$ |
| $D_{calc.}/g\text{ cm}^{-3}$ | 1.382                  |
| $\mu/\text{mm}^{-1}$         | 1.780                  |
| Formula Weight               | 464.97                 |
| Colour                       | colourless             |
| Shape                        | needle                 |
| Max Size/mm                  | 0.34                   |
| Mid Size/mm                  | 0.05                   |
| Min Size/mm                  | 0.03                   |
| $T/K$                        | 180.00(14)             |
| Crystal System               | monoclinic             |
| Space Group                  | $P2_1/n$               |
| $a/\text{\AA}$               | 7.9972(4)              |
| $b/\text{\AA}$               | 20.6791(7)             |
| $c/\text{\AA}$               | 13.5143(4)             |
| $\alpha^\circ$               | 90                     |
| $\beta^\circ$                | 90.901(3)              |
| $\gamma^\circ$               | 90                     |
| $V/\text{\AA}^3$             | 2234.66(15)            |
| $Z$                          | 4                      |
| $Z'$                         | 1                      |
| $\theta_{min}^\circ$         | 3.908                  |
| $\theta_{max}^\circ$         | 73.599                 |
| Measured Refl.               | 16344                  |
| Independent Refl.            | 4437                   |
| Reflections Used             | 3331                   |
| $R_{int}$                    | 0.0509                 |
| Parameters                   | 305                    |
| Restraints                   | 1                      |
| Largest Peak                 | 0.428                  |
| Deepest Hole                 | -0.410                 |
| GooF                         | 1.046                  |
| $wR_2$ (all data)            | 0.1636                 |
| $wR_2$                       | 0.1508                 |
| $R_1$ (all data)             | 0.0733                 |
| $R_1$                        | 0.0545                 |

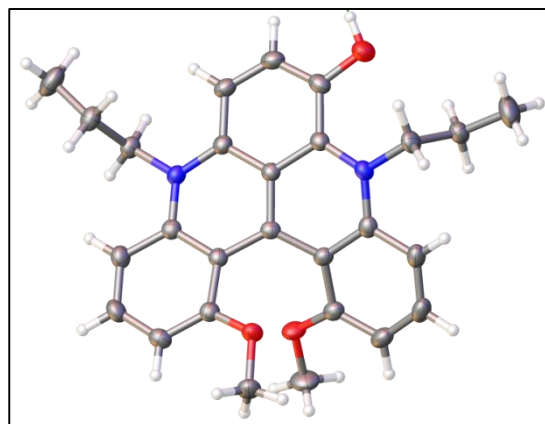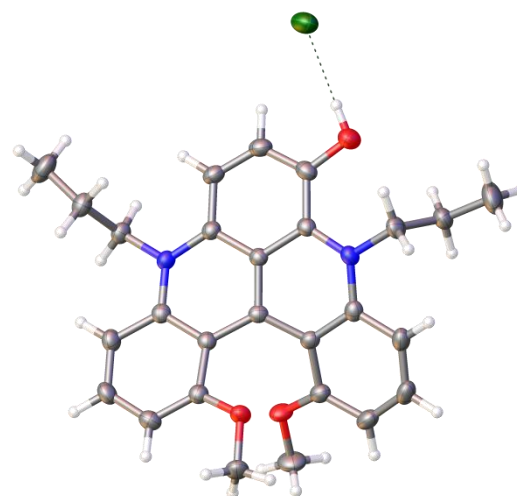

View of the asymmetric unit. Displacement parameters are drawn at 50 percent probability

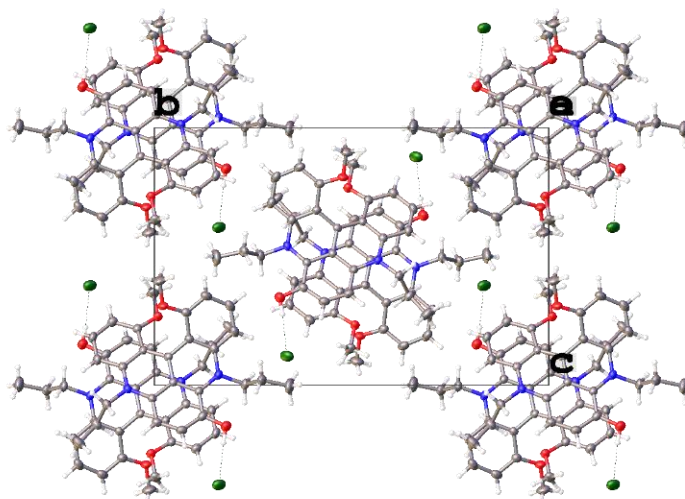

View along the a axis.

## Compound 15 (Y=OMe)

|                              |                                                                               |
|------------------------------|-------------------------------------------------------------------------------|
| CCDC                         | 1443640                                                                       |
| Formula                      | C <sub>28</sub> H <sub>31</sub> BF <sub>4</sub> N <sub>2</sub> O <sub>3</sub> |
| $D_{calc.}/\text{g cm}^{-3}$ | 1.392                                                                         |
| $\mu/\text{mm}^{-1}$         | 0.922                                                                         |
| Formula Weight               | 530.36                                                                        |
| Colour                       | red                                                                           |
| Shape                        | plate                                                                         |
| Max Size/mm                  | 0.52                                                                          |
| Mid Size/mm                  | 0.15                                                                          |
| Min Size/mm                  | 0.03                                                                          |
| $T/\text{K}$                 | 180.00(14)                                                                    |
| Crystal System               | triclinic                                                                     |
| Space Group                  | P-1                                                                           |
| $a/\text{\AA}$               | 7.8446(4)                                                                     |
| $b/\text{\AA}$               | 12.7594(7)                                                                    |
| $c/\text{\AA}$               | 13.7549(8)                                                                    |
| $\alpha^\circ$               | 69.935(5)                                                                     |
| $\beta^\circ$                | 78.524(5)                                                                     |
| $\gamma^\circ$               | 82.802(5)                                                                     |
| $V/\text{\AA}^3$             | 1264.90(13)                                                                   |
| $Z$                          | 2                                                                             |
| $Z'$                         | 1                                                                             |
| $\theta_{min}^\circ$         | 3.470                                                                         |
| $\theta_{max}^\circ$         | 73.474                                                                        |
| Measured Refl.               | 19658                                                                         |
| Independent Refl.            | 5013                                                                          |
| Reflections Used             | 3876                                                                          |
| $R_{int}$                    | 0.0527                                                                        |
| Parameters                   | 348                                                                           |
| Restraints                   | 0                                                                             |
| Largest Peak                 | 0.296                                                                         |
| Deepest Hole                 | -0.276                                                                        |
| GooF                         | 1.026                                                                         |
| $wR_2$ (all data)            | 0.1349                                                                        |
| $wR_2$                       | 0.1223                                                                        |
| $R_1$ (all data)             | 0.0615                                                                        |
| $R_1$                        | 0.0468                                                                        |

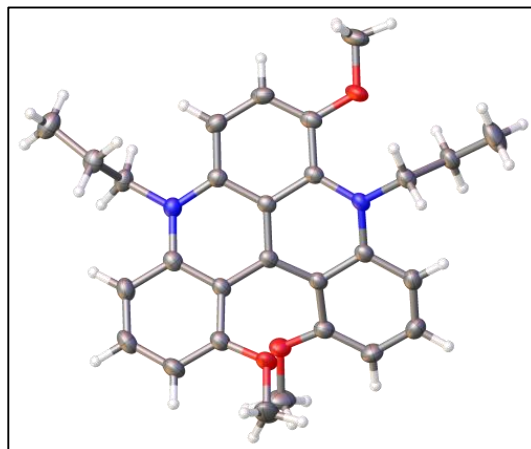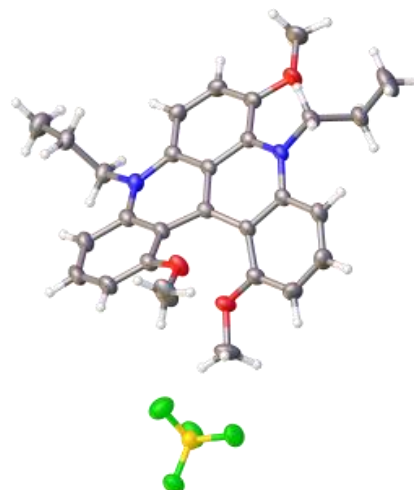

View of the asymmetric unit. Displacement parameters are drawn at 50 percent probability.

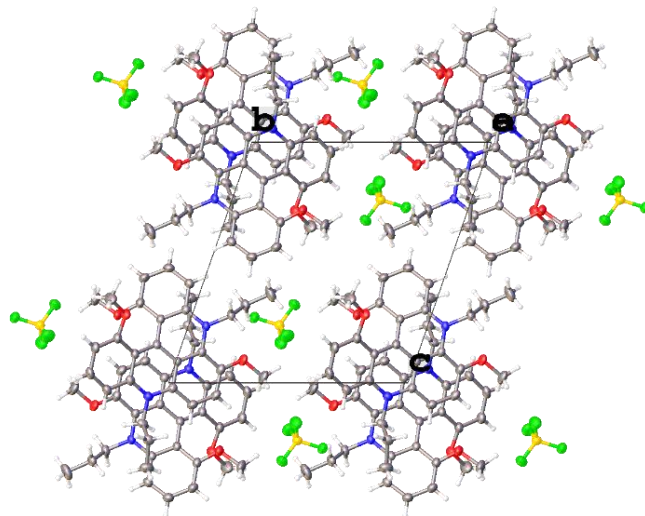

View along the a axis.

## Compound 17c (Y=CO<sub>2</sub>Et)

|                              |                                                                                               |
|------------------------------|-----------------------------------------------------------------------------------------------|
| CCDC                         | 1443636                                                                                       |
| Formula                      | C <sub>31</sub> H <sub>35</sub> BCl <sub>2</sub> F <sub>4</sub> N <sub>2</sub> O <sub>4</sub> |
| $D_{calc.}/g\text{ cm}^{-3}$ | 1.391                                                                                         |
| $\mu/\text{mm}^{-1}$         | 2.407                                                                                         |
| Formula Weight               | 657.32                                                                                        |
| Colour                       | red                                                                                           |
| Shape                        | plate                                                                                         |
| Max Size/mm                  | 0.30                                                                                          |
| Mid Size/mm                  | 0.19                                                                                          |
| Min Size/mm                  | 0.04                                                                                          |
| $T/\text{K}$                 | 180.00(14)                                                                                    |
| Crystal System               | triclinic                                                                                     |
| Space Group                  | P-1                                                                                           |
| $a/\text{\AA}$               | 10.9867(6)                                                                                    |
| $b/\text{\AA}$               | 12.0208(6)                                                                                    |
| $c/\text{\AA}$               | 13.2458(8)                                                                                    |
| $\alpha^\circ$               | 82.687(5)                                                                                     |
| $\beta^\circ$                | 66.161(6)                                                                                     |
| $\gamma^\circ$               | 79.273(5)                                                                                     |
| $V/\text{\AA}^3$             | 1569.51(17)                                                                                   |
| $Z$                          | 2                                                                                             |
| $Z'$                         | 1                                                                                             |
| $\theta_{min}^\circ$         | 3.654                                                                                         |
| $\theta_{max}^\circ$         | 73.622                                                                                        |
| Measured Refl.               | 24305                                                                                         |
| Independent Refl.            | 6249                                                                                          |
| Reflections Used             | 5628                                                                                          |
| $R_{int}$                    | 0.0278                                                                                        |
| Parameters                   | 402                                                                                           |
| Restraints                   | 0                                                                                             |
| Largest Peak                 | 0.682                                                                                         |
| Deepest Hole                 | -0.627                                                                                        |
| GooF                         | 1.067                                                                                         |
| $wR_2$ (all data)            | 0.1362                                                                                        |
| $wR_2$                       | 0.1320                                                                                        |
| $R_1$ (all data)             | 0.0545                                                                                        |

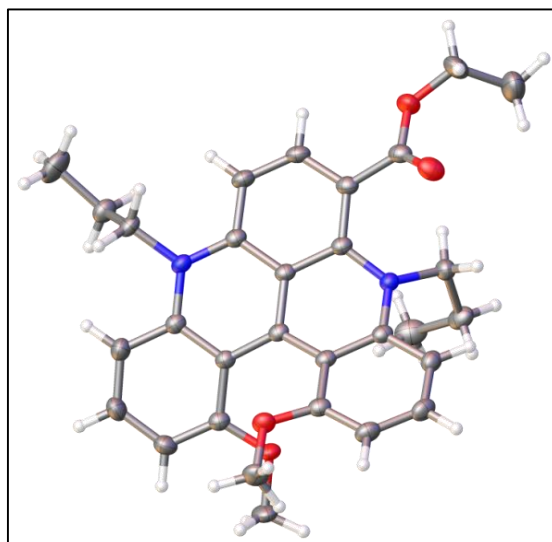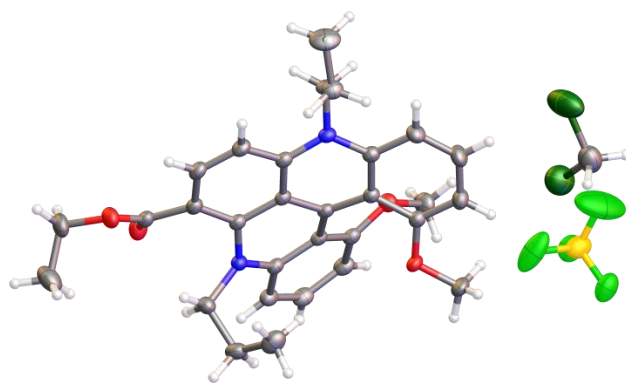

View of the asymmetric unit. Displacement parameters are drawn at 50 percent probability

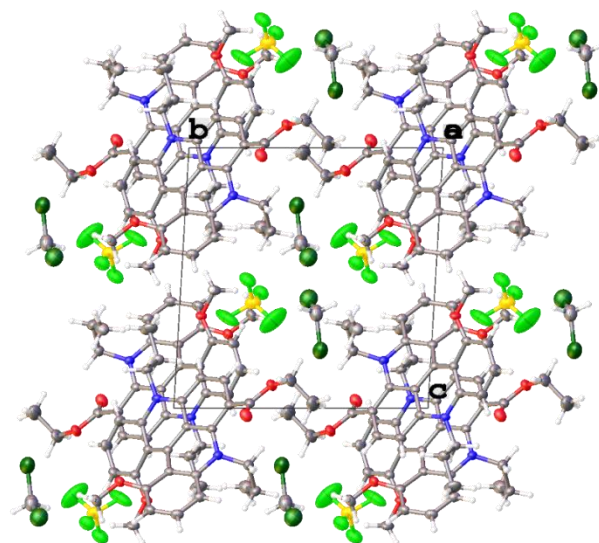

View along the a axis.

## Compound 17e (Y=COSEt)

|                        |                                                                                                 |
|------------------------|-------------------------------------------------------------------------------------------------|
| CCDC                   | 1443639                                                                                         |
| Formula                | C <sub>31</sub> H <sub>35</sub> BCl <sub>2</sub> F <sub>4</sub> N <sub>2</sub> O <sub>3</sub> S |
| $D_{calc.}/g\ cm^{-3}$ | 1.407                                                                                           |
| $\mu/mm^{-1}$          | 2.964                                                                                           |
| Formula Weight         | 673.38                                                                                          |
| Colour                 | red                                                                                             |
| Shape                  | plate                                                                                           |
| Max Size/mm            | 0.44                                                                                            |
| Mid Size/mm            | 0.24                                                                                            |
| Min Size/mm            | 0.11                                                                                            |
| $T/K$                  | 180(2)                                                                                          |
| Crystal System         | triclinic                                                                                       |
| Space Group            | P-1                                                                                             |
| $a/\text{\AA}$         | 11.1714(6)                                                                                      |
| $b/\text{\AA}$         | 11.8849(6)                                                                                      |
| $c/\text{\AA}$         | 13.3323(7)                                                                                      |
| $\alpha^\circ$         | 84.422(4)                                                                                       |
| $\beta^\circ$          | 65.830(5)                                                                                       |
| $\gamma^\circ$         | 79.905(4)                                                                                       |
| $V/\text{\AA}^3$       | 1589.31(16)                                                                                     |
| $Z$                    | 2                                                                                               |
| $Z'$                   | 1                                                                                               |
| $\theta_{min}^\circ$   | 3.635                                                                                           |
| $\theta_{max}^\circ$   | 73.778                                                                                          |
| Measured Refl.         | 24488                                                                                           |
| Independent Refl.      | 6301                                                                                            |
| Reflections Used       | 5791                                                                                            |
| $R_{int}$              | 0.0233                                                                                          |
| Parameters             | 402                                                                                             |
| Restraints             | 0                                                                                               |
| Largest Peak           | 0.835                                                                                           |
| Deepest Hole           | -1.018                                                                                          |
| Goof                   | 1.066                                                                                           |
| $wR_2$ (all data)      | 0.1786                                                                                          |
| $wR_2$                 | 0.1750                                                                                          |
| $R_1$ (all data)       | 0.0643                                                                                          |
| $R_1$                  | 0.0610                                                                                          |

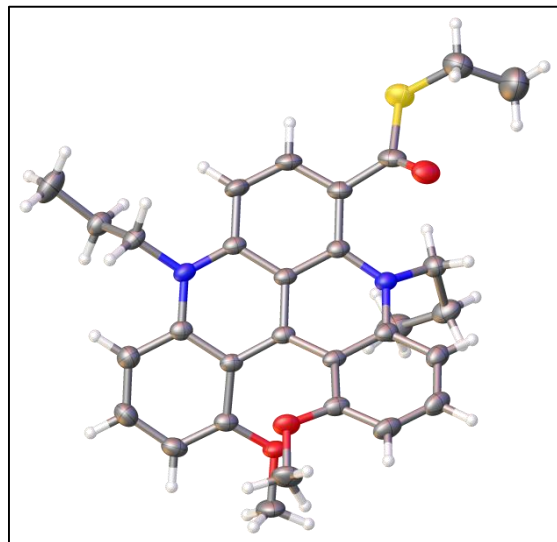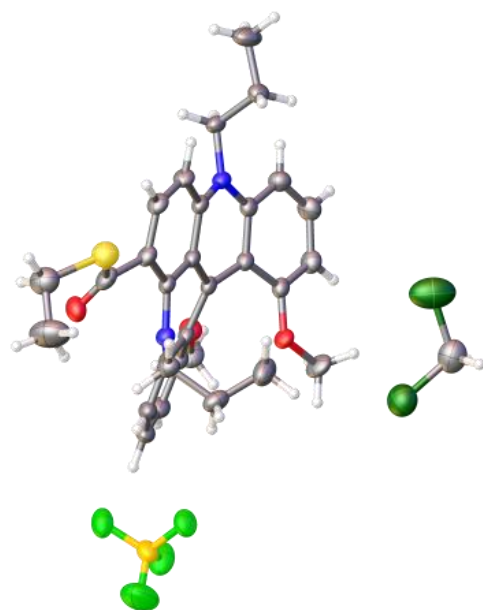

View of the asymmetric unit. Displacement parameters are drawn at 50 percent probability

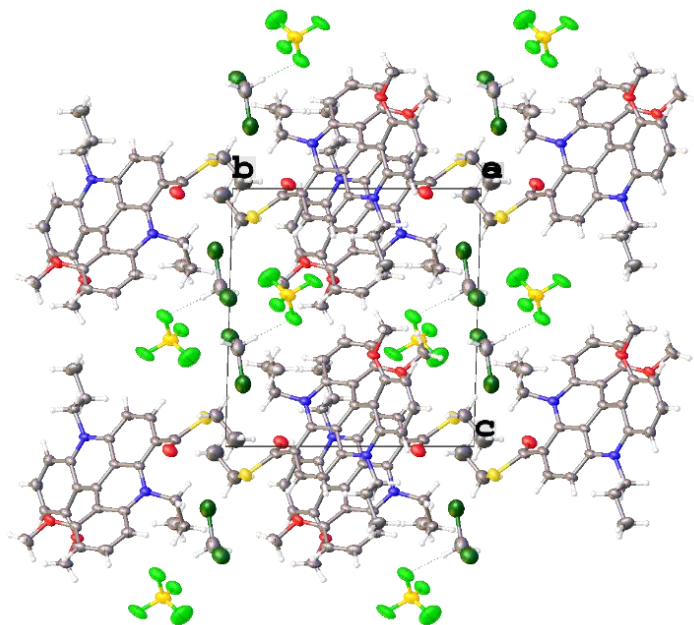

View along the a axis.



## Compound 17f (Y=CONHPr)

|                              |                                                                               |
|------------------------------|-------------------------------------------------------------------------------|
| CCDC                         | 1443637                                                                       |
| Formula                      | C <sub>31</sub> H <sub>36</sub> BF <sub>4</sub> N <sub>3</sub> O <sub>3</sub> |
| $D_{calc.}/\text{g cm}^{-3}$ | 1.340                                                                         |
| $\mu/\text{mm}^{-1}$         | 0.865                                                                         |
| Formula Weight               | 585.44                                                                        |
| Colour                       | red                                                                           |
| Shape                        | plate                                                                         |
| Max Size/mm                  | 0.31                                                                          |
| Mid Size/mm                  | 0.18                                                                          |
| Min Size/mm                  | 0.03                                                                          |
| $T/\text{K}$                 | 179.95(10)                                                                    |
| Crystal System               | triclinic                                                                     |
| Space Group                  | P-1                                                                           |
| $a/\text{\AA}$               | 8.8012(3)                                                                     |
| $b/\text{\AA}$               | 13.0835(4)                                                                    |
| $c/\text{\AA}$               | 14.2973(4)                                                                    |
| $\alpha^\circ$               | 108.555(3)                                                                    |
| $\beta^\circ$                | 106.512(3)                                                                    |
| $\gamma^\circ$               | 97.631(3)                                                                     |
| $V/\text{\AA}^3$             | 1450.56(8)                                                                    |
| $Z$                          | 2                                                                             |
| $Z'$                         | 1                                                                             |
| $\theta_{min}^\circ$         | 3.477                                                                         |
| $\theta_{max}^\circ$         | 73.803                                                                        |
| Measured Refl.               | 22881                                                                         |
| Independent Refl.            | 5761                                                                          |
| Reflections Used             | 5022                                                                          |
| $R_{int}$                    | 0.0256                                                                        |
| Parameters                   | 420                                                                           |
| Restraints                   | 127                                                                           |
| Largest Peak                 | 0.323                                                                         |
| Deepest Hole                 | -0.419                                                                        |
| GooF                         | 1.063                                                                         |
| $wR_2$ (all data)            | 0.1179                                                                        |
| $wR_2$                       | 0.1129                                                                        |
| $R_1$ (all data)             | 0.0480                                                                        |
| $R_1$                        | 0.0421                                                                        |

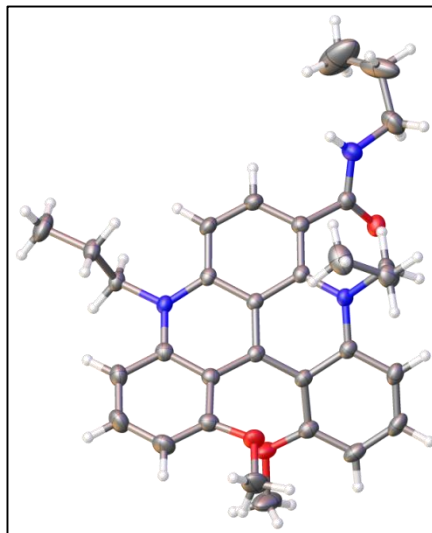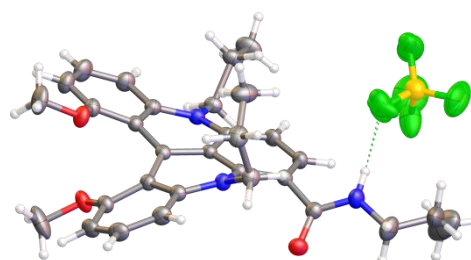

View of the asymmetric unit. Displacement parameters are drawn at 50 percent probability

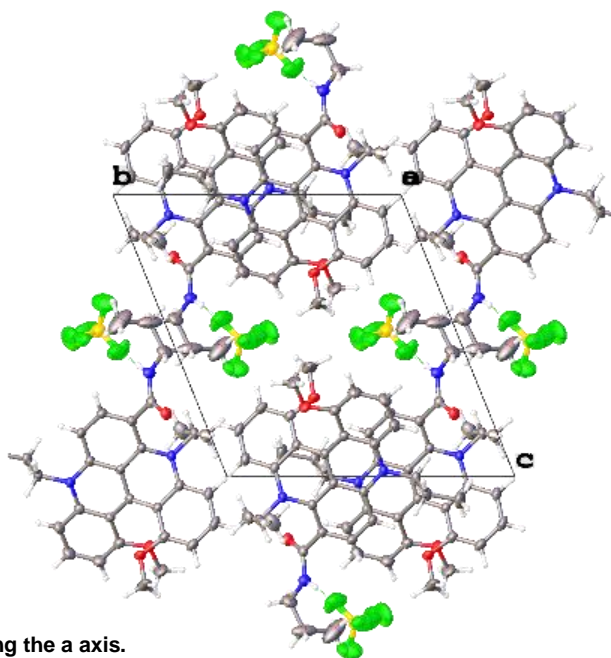

View along the a axis.

The BF<sub>4</sub><sup>-</sup> anion is disordered and was refined using restraints on 1-2 and 1-3 distances. Anisotropic displacement parameters were also restrained.

## Compound 17c (Y=CONEt<sub>2</sub>)

|                              |                                                                                 |
|------------------------------|---------------------------------------------------------------------------------|
| CCDC                         | 1443638                                                                         |
| Formula                      | C <sub>35.5</sub> H <sub>42</sub> BF <sub>4</sub> N <sub>3</sub> O <sub>3</sub> |
| $D_{calc.}/g\text{ cm}^{-3}$ | 1.287                                                                           |
| $\mu/\text{mm}^{-1}$         | 0.803                                                                           |
| Formula Weight               | 645.53                                                                          |
| Colour                       | red                                                                             |
| Shape                        | plate                                                                           |
| Max Size/mm                  | 0.53                                                                            |
| Mid Size/mm                  | 0.42                                                                            |
| Min Size/mm                  | 0.07                                                                            |
| $T/K$                        | 180.00(14)                                                                      |
| Crystal System               | triclinic                                                                       |
| Space Group                  | P-1                                                                             |
| $a/\text{\AA}$               | 11.0563(3)                                                                      |
| $b/\text{\AA}$               | 13.2880(4)                                                                      |
| $c/\text{\AA}$               | 14.0408(5)                                                                      |
| $\alpha^\circ$               | 115.683(3)                                                                      |
| $\beta^\circ$                | 92.594(3)                                                                       |
| $\gamma^\circ$               | 112.243(3)                                                                      |
| $V/\text{\AA}^3$             | 1665.63(11)                                                                     |
| $Z$                          | 2                                                                               |
| $Z'$                         | 1                                                                               |
| $\theta_{min}^\circ$         | 4.116                                                                           |
| $\theta_{max}^\circ$         | 73.407                                                                          |
| Measured Refl.               | 25669                                                                           |
| Independent Refl.            | 6598                                                                            |
| Reflections Used             | 5743                                                                            |
| $R_{int}$                    | 0.0282                                                                          |
| Parameters                   | 531                                                                             |
| Restraints                   | 257                                                                             |
| Largest Peak                 | 0.512                                                                           |
| Deepest Hole                 | -0.327                                                                          |
| GooF                         | 1.049                                                                           |
| $wR_2$ (all data)            | 0.1748                                                                          |
| $wR_2$                       | 0.1675                                                                          |
| $R_1$ (all data)             | 0.0631                                                                          |
| $R_1$                        | 0.0574                                                                          |

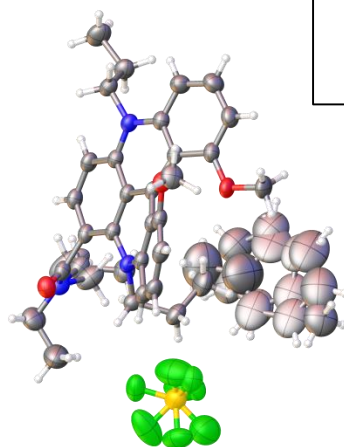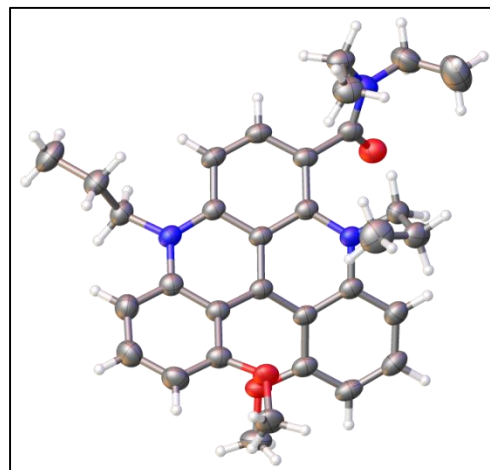

View of the asymmetric unit. Displacement parameters are drawn at 50 percent probability

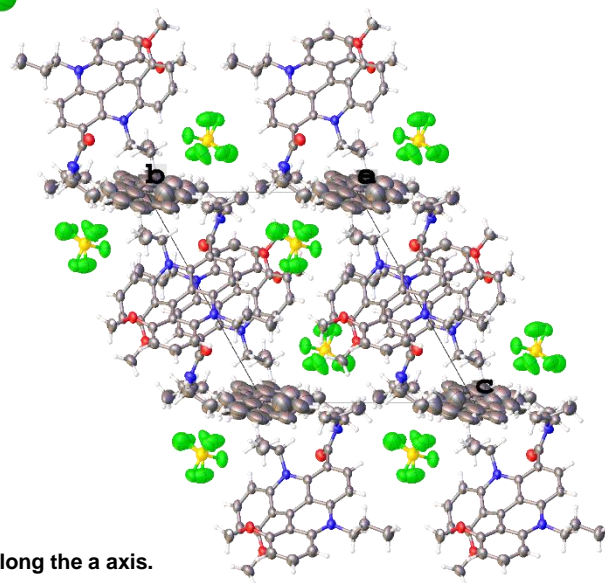

View along the a axis.

The  $\text{BF}_4^-$  ion is slightly disordered and was refined with 2 components (occupancy 0.8 and 0.2, respectively). SADI restraints were applied on 1,2 and 1,3 distances. RIGU restraints were applied on anisotropic displacement parameters. There is one ethyl chain that is disordered. It was refined using two positions (occupancy 0.567 and 0.433). Restraints were applied on distances and anisotropic displacement parameters. Finally, there is a very disordered toluene molecule which was modelled using two rigid bodies with occupancy 0.25 each. The anisotropic displacement parameters are large but the stoichiometry is well-consistent with the SQUEEZE/BYPASS procedure where the hole at the position of the toluene molecule (0.5 0 0 on the symmetry center) contained 50 electrons. Using the "squeezed" data gave slightly better agreement factor for the refinement but the model with the solvent molecule was preferred.



## 5. <sup>1</sup>H-NOESY experiment of compound 6

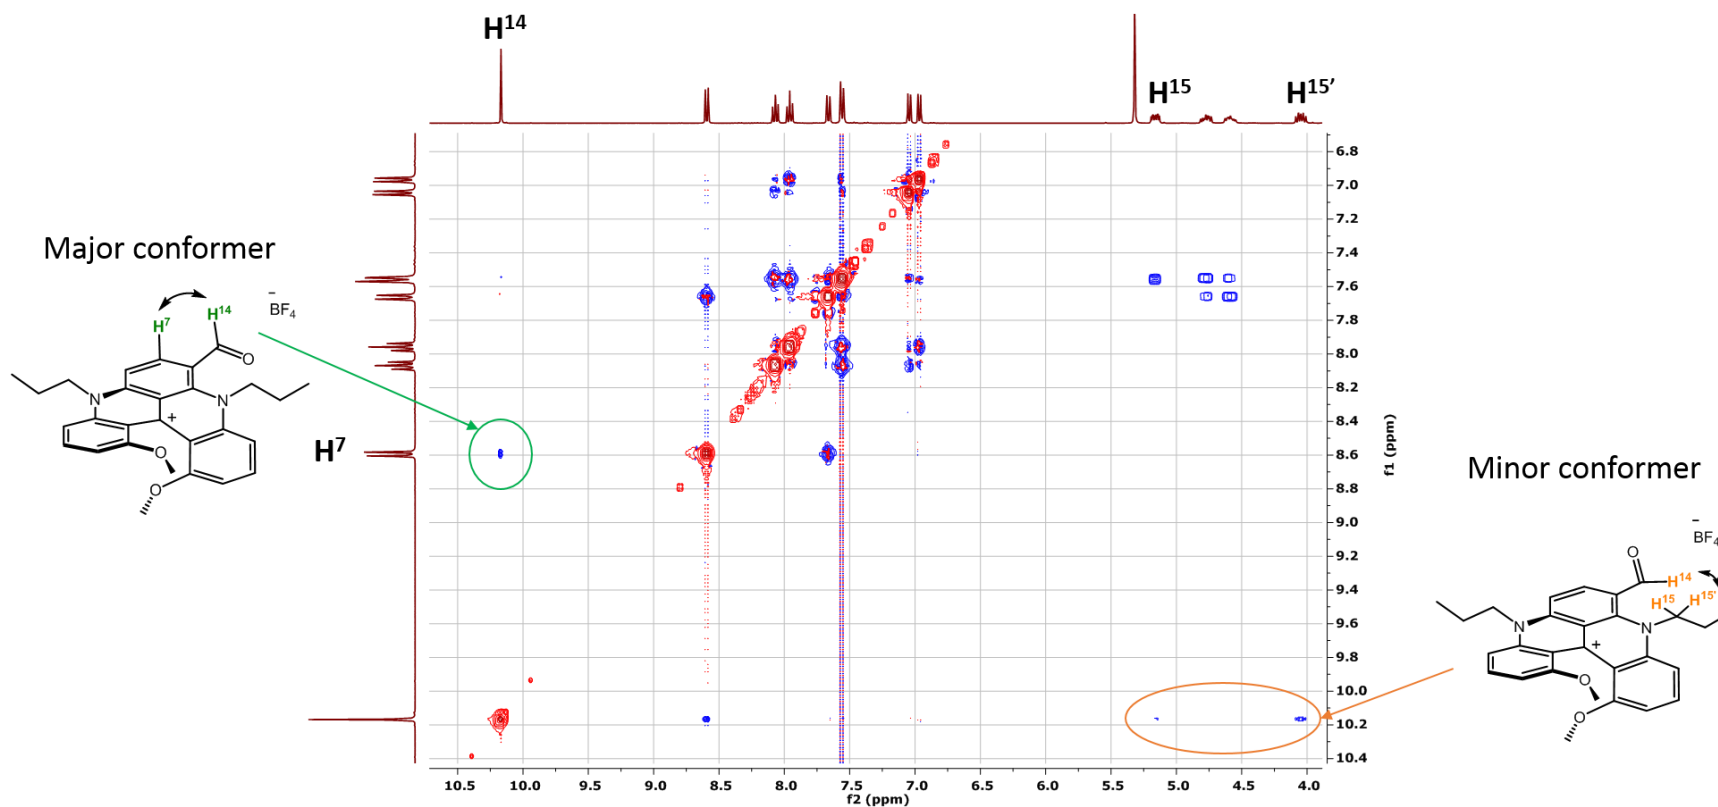

Figure S 2. <sup>1</sup>H-NOESY map of compound 6, CD<sub>2</sub>Cl<sub>2</sub>, 400 MHz, 298 K. The <sup>1</sup>H-NOESY experiment shows two different correlation spots. The major conformer presents H<sup>14</sup> in front of H<sup>7</sup> (circled in green on the map) and the minor conformer presents H<sup>14</sup> in front of H<sup>15</sup> and H<sup>15'</sup> (circled in orange on the map)

## 6. Additional cyclic voltammetry data

Table S 2. Anodic and cathodic peak potentials ( $E_{pa}$ ,  $E_{pc}$ ) and half-wave potentials ( $E_{1/2}$ ) values (mV) measured by CV for [4]helicenes ( $10^{-3}$  M) in acetonitrile ([TBA][PF<sub>6</sub>]  $10^{-1}$  M) at a Pt electrode ( $\varnothing = 3$  mm,  $\nu = 0.1$  V.s<sup>-1</sup>), E vs Ag/Ag<sup>+</sup>. Red<sub>n</sub> and Ox<sub>n</sub> represent the n successive reduction and oxidation processes, respectively.

| Molecule   | Functional group (Y)         | Red <sub>3</sub> |          |          | Red <sub>2</sub> |          |          | Red <sub>1</sub> |          |          | Ox <sub>1</sub> |          |          | Ox <sub>2</sub> |          |          | Fc/Fc <sup>+</sup> |  |  |
|------------|------------------------------|------------------|----------|----------|------------------|----------|----------|------------------|----------|----------|-----------------|----------|----------|-----------------|----------|----------|--------------------|--|--|
|            |                              | $E_{pc}$         | $E_{pa}$ | $E_{pc}$ | $E_{1/2}$        | $E_{pa}$ | $E_{pc}$ | $E_{1/2}$        | $E_{pa}$ | $E_{pc}$ | $E_{1/2}$       | $E_{pa}$ | $E_{pc}$ | $E_{1/2}$       | $E_{pa}$ | $E_{pc}$ | $E_{1/2}$          |  |  |
| <b>1</b>   | H                            | -                | -        | -        | -                | -1109    | -1178    | -1144            | 1002     | 929      | 966             | -        | -        | -               | 114      | 50       | 82                 |  |  |
| <b>5</b>   | NO <sub>2</sub>              | -                | -1626    | -1765    | -1696            | -854     | -922     | -888             | 1417     | -        | -               | -        | -        | -               | 113      | 51       | 82                 |  |  |
| <b>6</b>   | CHO                          | -1892            | -1126    | -1243    | -1185            | -942     | -1009    | -976             | 1257     | 1172     | 1215            | -        | -        | -               | 116      | 51       | 84                 |  |  |
| <b>7</b>   | NH <sub>2</sub>              | -                | -        | -        | -                | -1071    | -1148    | -1110            | 487      | 403      | 445             | 915      | -        | -               | 134      | 49       | 92                 |  |  |
| <b>8</b>   | NMe <sub>2</sub>             | -                | -        | -        | -                | -1065    | -1136    | -1101            | 463      | 400      | 432             | 819      | 707      | 763             | 129      | 51       | 90                 |  |  |
| <b>9</b>   | N <sub>3</sub>               | -                | -        | -1780    | -                | -0.972   | -1036    | -1004            | 897      | 820      | 859             | 1401     | -        | -               | 126      | 54       | 90                 |  |  |
| <b>15</b>  | OMe                          | -                | -        | -        | -                | -1042    | -1107    | -1075            | 764      | 695      | 730             | 1380     | -        | -               | 122      | 57       | 90                 |  |  |
| <b>16</b>  | CO <sub>2</sub> <sup>-</sup> | -                | -        | -        | -                | -1158    | -1240    | -1199            | 831      | -        | -               | 1137     | 1047     | 1092            | 120      | 51       | 86                 |  |  |
| <b>17c</b> | CO <sub>2</sub> Et           | -                | -        | -        | -                | -972     | -1041    | -1007            | 1211     | 1126     | 1169            | -        | -        | -               | 118      | 51       | 85                 |  |  |
| <b>17f</b> | CONHPr                       | -                | -1727    | -1856    | -1792            | -1001    | -1070    | -1036            | 1127     | 1042     | 1085            | -        | -        | -               | 118      | 51       | 85                 |  |  |

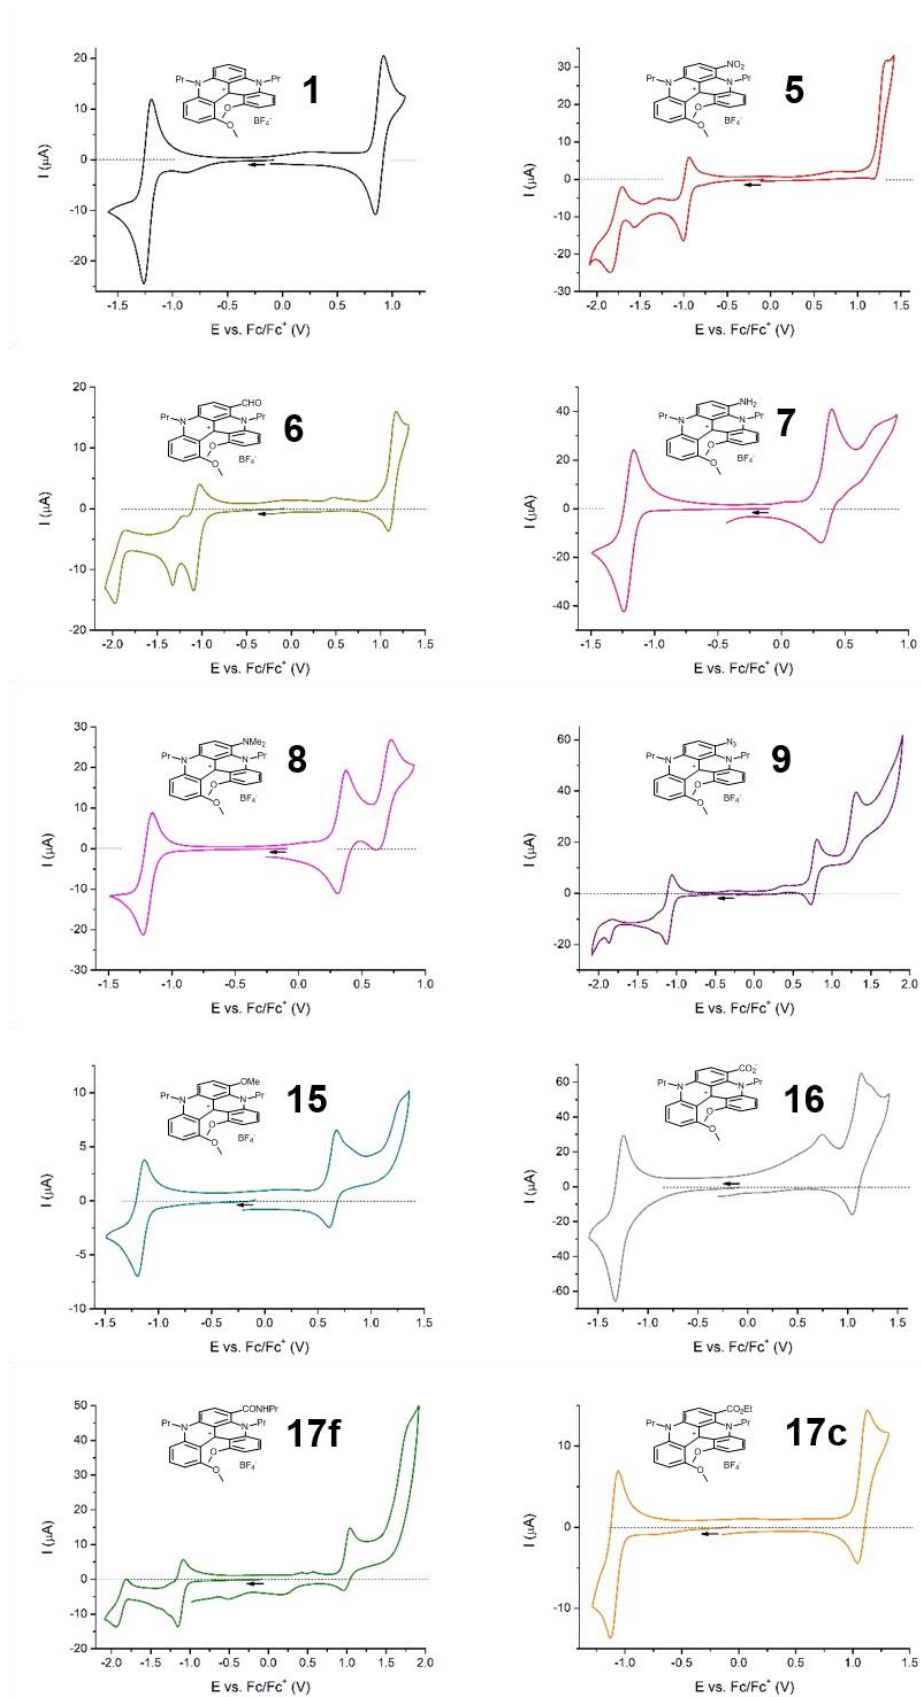

Figure S 3. Voltammetric curves of acetonitrile ( $[TBA][PF_6] 10^{-1} M$ ) solutions of [4]helicenes ( $10^{-3} M$ ) recorded at a Pt working electrode ( $v = 0.1 V \cdot s^{-1}$ ).

## 7. Additional optical data

### 1. Solvatochromism

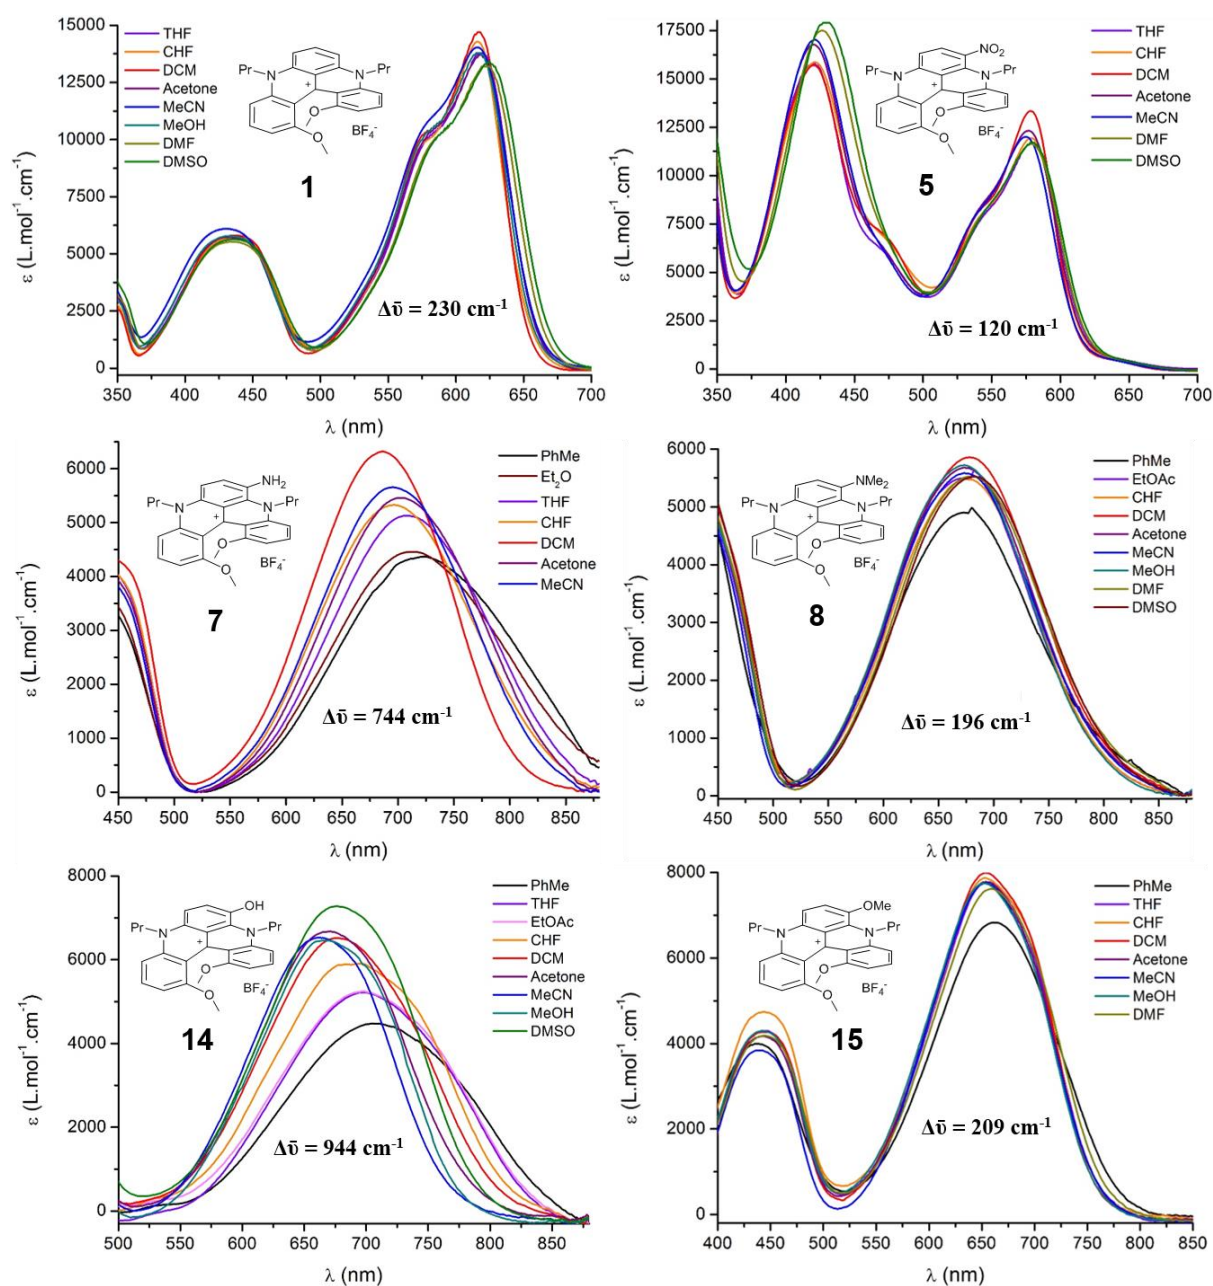

Figure S 4. Absorption solvatochromism ( $10^{-5}$  M) of compounds **1** (top left), **5** (top right), **7** (middle left), **8** (middle right), **14** (bottom left) and **15** (bottom right).

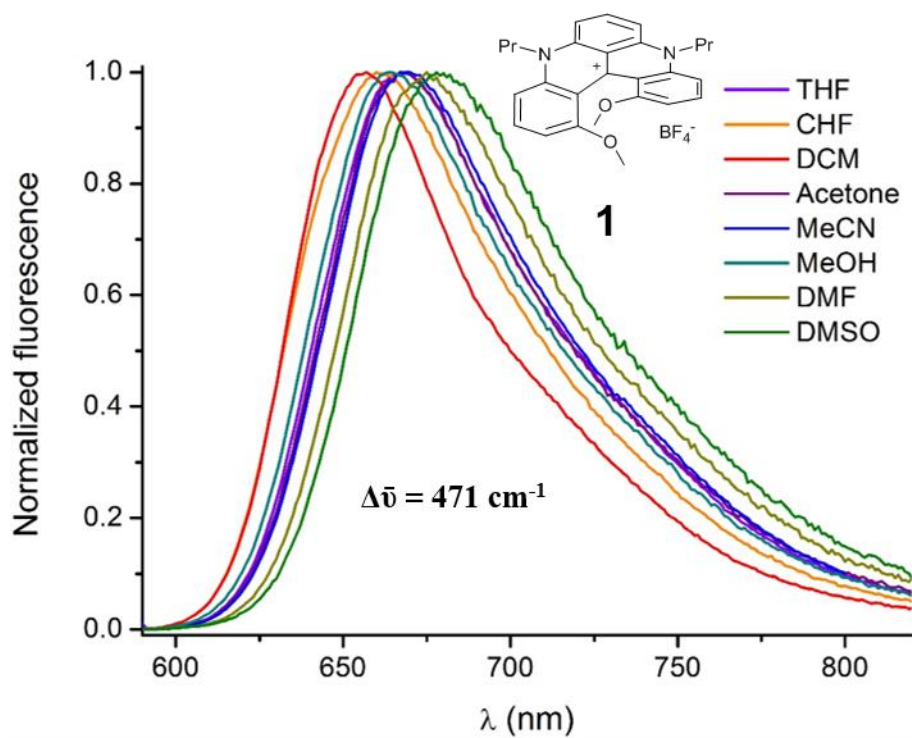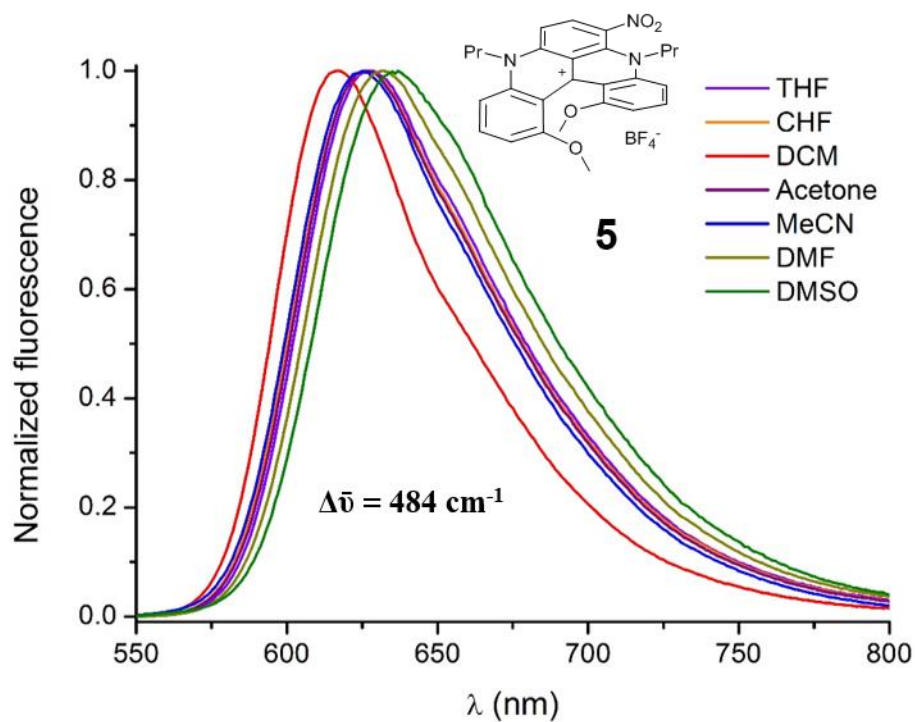

Figure S 5. Emission solvatochromism of compounds **1** (top) and **5** (bottom).

## 2. Fluorescence

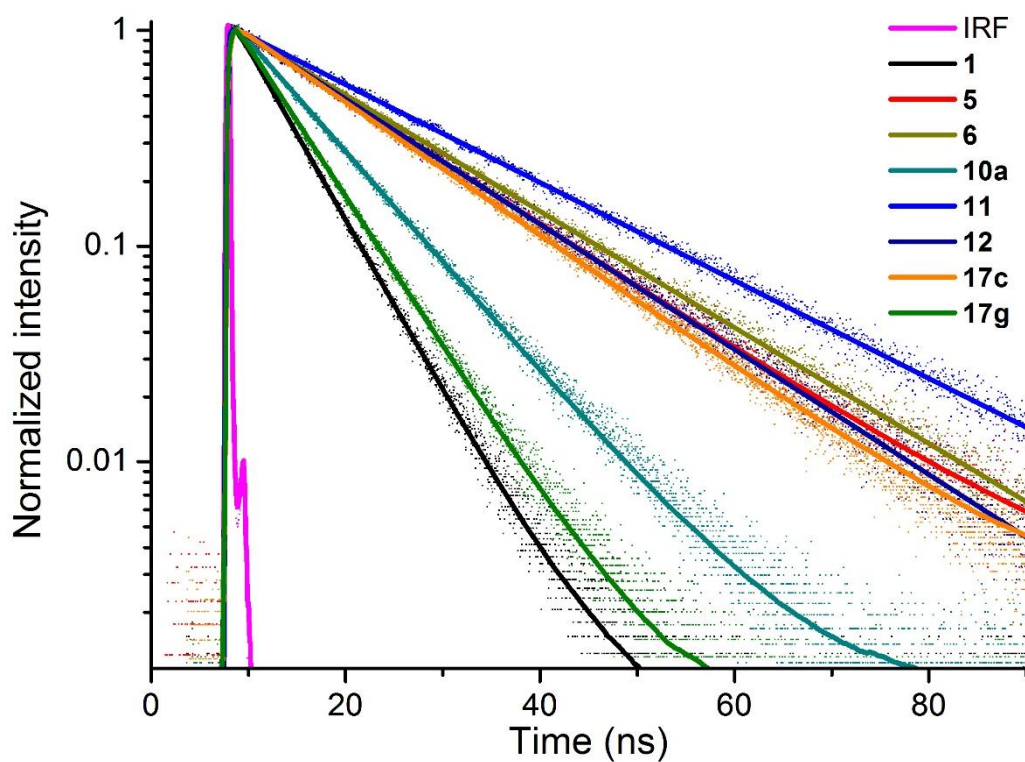

Figure S 6. Intensity normalized fluorescence time profiles and best single exponential fit of selected [4]helicene dyes in acetonitrile.

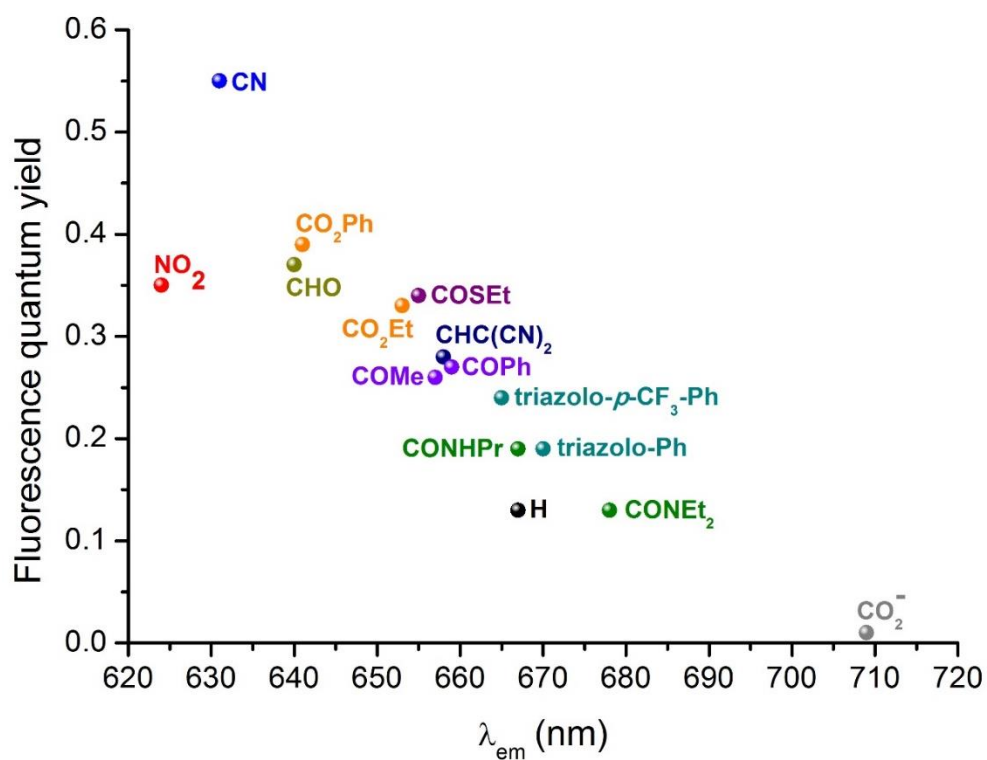

Figure S 7. Plot of fluorescence quantum yield depending on the emission maxima in acetonitrile.

### 3. ECD and OR data

Cationic [4]helicenes are dyes that absorb light efficiently in most of the visible region, leading to high errors during OR measurements. Thus very dilute solutions and restricted wavelengths were required to measure the specific optical rotations with Hg lamp.

#### 1,13-dimethoxy-5,9-dipropyl-5,9-dihydro-13bH-quinolino[2,3,4-kl]acridin-13b-ylium tetrafluoroborate (1)

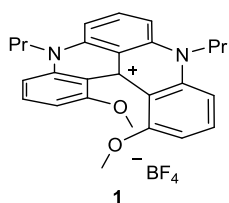

*M* enantiomer: **CD** (CH<sub>3</sub>CN, 1.16.10<sup>-5</sup> M, 20°C) λ (Δε) 640 (-2.2), 456 (7.2), 403 (-1.8), 350 (-27.8), 307 (23.4), 281 (-63.7). **OR** [α]<sub>365</sub> = - 13600 (CH<sub>3</sub>CN, c = 5.80.10<sup>-6</sup> g.mL<sup>-1</sup>, 20°C).

*P* enantiomer: **CD** (CH<sub>3</sub>CN, 1.18.10<sup>-5</sup> M, 20°C) λ (Δε) 648 (1.3), 455 (-6.4), 407 (2.2), 351 (31.7), 306 (-27.0), 281 (70.6). **OR** [α]<sub>365</sub> = + 13900 (CH<sub>3</sub>CN, c = 5.88.10<sup>-6</sup> g.mL<sup>-1</sup>, 20°C).

#### 1,13-dimethoxy-6-nitro-5,9-dipropyl-5,9-dihydro-13bH-quinolino[2,3,4-kl]acridin-13b-ylium tetrafluoroborate (5)

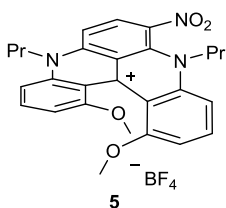

*M* enantiomer: **CD** (CH<sub>3</sub>CN, 1.09.10<sup>-5</sup> M, 20°C) λ (Δε) 579 (-5.6), 476 (6.3), 412 (-5.3), 340 (-31.1), 308 (-44.1), 287 (35.0). **OR** [α]<sub>365</sub> = - 7600 (CH<sub>3</sub>CN, c = 5.92.10<sup>-6</sup> g.mL<sup>-1</sup>, 20°C).

*P* enantiomer: **CD** (CH<sub>3</sub>CN, 1.17.10<sup>-5</sup> M, 20°C) λ (Δε) 582 (5.7), 473 (-7.8), 413 (4.5), 340 (32.7), 308 (47.0), 287 (-40.9). **OR** [α]<sub>365</sub> = + 7100 (CH<sub>3</sub>CN, c = 6.36.10<sup>-6</sup> g.mL<sup>-1</sup>, 20°C).

#### 6-formyl-1,13-dimethoxy-5,9-dipropyl-5,9-dihydro-13bH-quinolino[2,3,4-kl]acridin-13b-ylium tetrafluoroborate (6)

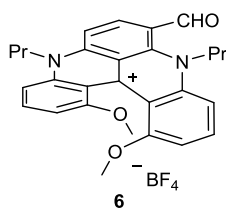

*M* enantiomer: **CD** (CH<sub>3</sub>CN, 1.05.10<sup>-5</sup> M, 20°C) λ (Δε) 594 (-4.6), 464 (8.9), 410 (-1.7), 380 (11.2), 337 (-10.9), 305 (-51.5), 263 (-7.1). **OR** [α]<sub>365</sub> = - 9800 (CH<sub>3</sub>CN, c = 5.52.10<sup>-6</sup> g.mL<sup>-1</sup>, 20°C).

*P* enantiomer: **CD** (CH<sub>3</sub>CN, 1.11.10<sup>-5</sup> M, 20°C) λ (Δε) 592 (3.9), 463 (-8.3), 412 (4.1), 381 (-11.9), 337 (14.3), 305 (63.5), 264 (10.2). **OR** [α]<sub>365</sub> = + 11700 (CH<sub>3</sub>CN, c = 5.88.10<sup>-6</sup> g.mL<sup>-1</sup>, 20°C).

#### 6-amino-1,13-dimethoxy-5,9-dipropyl-5,9-dihydro-13bH-quinolino[2,3,4-kl]acridin-13b-ylium tetrafluoroborate (7)

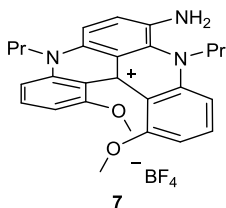

*M* enantiomer: **CD** (CH<sub>3</sub>CN, 1.13.10<sup>-5</sup> M, 20°C) λ (Δε) 723 (-3.8), 459 (10.3), 408 (-1.3), 363 (-14.3), 340 (-18.3), 313 (20.7), 283 (-37.9), 262 (-45.4). **OR** [α]<sub>365</sub> = - 4100 (CH<sub>3</sub>CN, c = 5.80.10<sup>-6</sup> g.mL<sup>-1</sup>, 20°C).

*P* enantiomer: **CD** (CH<sub>3</sub>CN, 1.15.10<sup>-5</sup> M, 20°C) λ (Δε) 726 (4.3), 462 (-11.0), 409 (1.1), 363 (14.4), 340 (18.0), 313 (-21.9), 283 (38.3), 262 (47.3). **OR** [α]<sub>365</sub> = + 4600 (CH<sub>3</sub>CN, c = 5.92.10<sup>-6</sup> g.mL<sup>-1</sup>, 20°C).



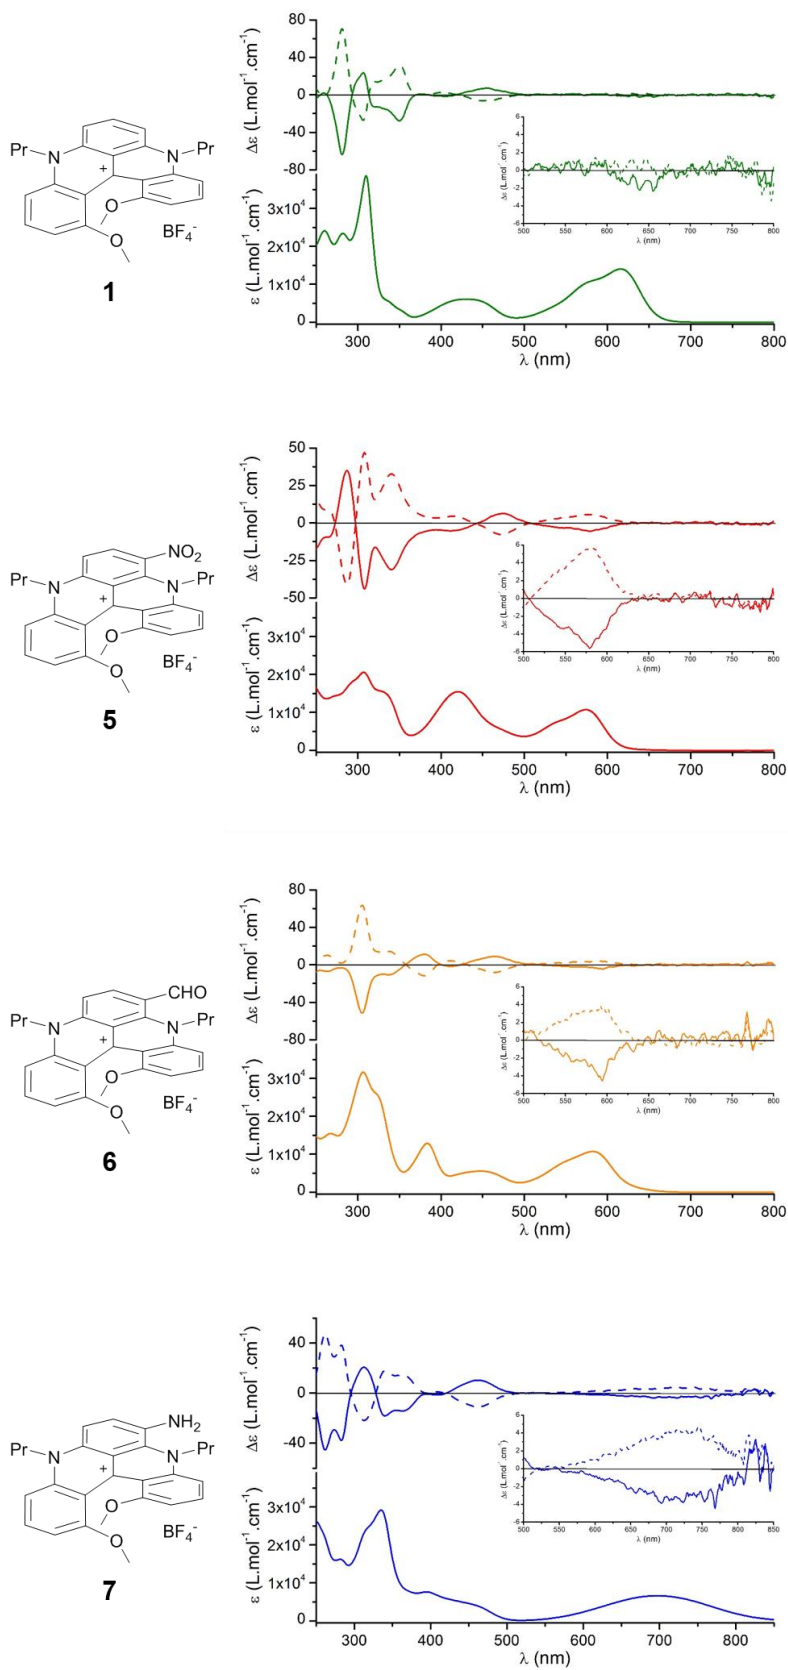

Figure S 8. Absorption versus ECD spectra of (*M*) (plain lines) and (*P*)-helices (dashed lines) for compounds **1** (green), **5** (red), **6** (orange) and **7** (blue) in acetonitrile (10<sup>-5</sup> M) at 293 K. Insets: zoom of ECD in the Vis-NIR range.



## 8. References

- (1) Laursen, B. W.; Krebs, F. C. *Angew. Chem. Int. Ed.* **2000**, *39*, 3432.
- (2) Herse, C.; Bas, D.; Krebs, F. C.; Bürgi, T.; Weber, J.; Wesolowski, T.; Laursen, B. W.; Lacour, J. *Angew. Chem. Int. Ed.* **2003**, *42*, 3162.
- (3) CrysAlisPro Software system, Agilent Technologies UK Ltd., Oxford, UK.
- (4) Sheldrick, G. *Acta Crystallogr. A* **2008**, *64*, 112.
- (5) Burla, M. C.; Caliandro, R.; Camalli, M.; Carrozzini, B.; Cascarano, G. L.; De Caro, L.; Giacovazzo, C.; Polidori, G.; Spagna, R. *J. Appl. Crystallogr.* **2005**, *38*, 381.
- (6) Palatinus, L.; Chapuis, G. *J. Appl. Crystallogr.* **2007**, *40*, 786.
- (7) Dolomanov, O. V.; Bourhis, L. J.; Gildea, R. J.; Howard, J. A. K.; Puschmann, H. *J. Appl. Crystallogr.* **2009**, *42*, 339.
- (8) Muller, P.-A.; Högemann, C.; Allonas, X.; Jacques, P.; Vauthey, E. *Chem. Phys. Lett.* **2000**, *326*, 321.
- (9) Furstenberg, A.; Vauthey, E. *Photochem. Photobiol. Sci.* **2005**, *4*, 260.
- (10) Brunet, E.; Jiménez, L.; de Victoria-Rodríguez, M.; Luu, V.; Muller, G.; Juanes, O.; Rodríguez-Ubis, J. C. *Microporous Mesoporous Mater.* **2013**, *169*, 222, and references therein.
- (11) Dekkers, H. P. J. M.; Moraal, P. F.; Timper, J. M.; Riehl, J. P. *Appl. Spectrosc.* **1985**, *39*, 818.
